# Supplementary material for: The global burden of pathogens and pests on major food crops
Source: Springer Nature journal article supplement (doi:10.1038/s41559-018-0793-y), 2019-02-04
Supplement: 41559_2018_793_MOESM1_ESM.pdf [file 41559_2018_793_MOESM1_ESM.pdf]

In the format provided by the authors and unedited.

# The global burden of pathogens and pests on major food crops

Serge Savary<sup>1</sup>, Laetitia Willocquet<sup>1</sup>, Sarah Jane Pethybridge <sup>2</sup>, Paul Esker <sup>3</sup>, Neil McRoberts <sup>4</sup> and Andy Nelson <sup>5\*</sup>

---

<sup>1</sup>AGIR, INRA, Université de Toulouse, INPT, INP-EI Purpan, Castanet-Tolosan, France. <sup>2</sup>School of Integrative Plant Science, Cornell University, Cornell AgriTech at The New York State Agricultural Experiment Station, Geneva, NY, USA. <sup>3</sup>Department of Plant Pathology and Environmental Microbiology, Penn State University, University Park, PA, USA. <sup>4</sup>Plant Pathology Department, University of California, Davis, Davis, CA, USA. <sup>5</sup>Faculty of Geo-Information Science and Earth Observation, University of Twente, Enschede, the Netherlands. \*e-mail: [a.nelson@utwente.nl](mailto:a.nelson@utwente.nl)

## **The global burden of pathogens and pests on major food crops**

Serge Savary, Laetitia Willocquet, Sarah Jane Pethybridge, Paul Esker, Neil McRoberts, Andy Nelson

### **Supplementary Information**

**Supplementary Figure 1.** Survey responses and crop area. Each map shows the approximate location of survey responses per crop. Land area from the Global Administrative Areas Database<sup>54</sup>. Background shows the harvested area per crop<sup>55</sup> in quintiles. Symbol size scaled by the product of crop loss magnitude and crop loss frequency.

**Supplementary Figure 2.** Bar chart of distributions of survey responses by crop and by increasing quartiles of national crop production. PQ1: countries with national production below the first quartile; PQ2: countries with national production between the first and the second quartile (i.e., the median); PQ3: countries with national production between the second (i.e., the median) and the third quartile; PQ4: countries with national production above the third quartile. Percentage figures at the top of the bars indicate the proportion of world production (not of the total production covered by the survey) of each crop accounted for by successive groups of countries.

**Supplementary Figure 3.** Crop specific associations between losses, yield, climate, food security hotspots and key pests. Each panel is a correspondence analysis map based on the survey responses for that crop. Active variables (loss magnitude, yield quartiles, climate type) are in bold and supplemental variables (food security hotspot, key pests) are in italics. ARID=Arid; CONT=Humid continental; EQUAT=Equatorial; MEDIT= Mediterranean; MONSO= Monsoon; OCEAN=Oceanic; SUBTR=Subtropics; TROPH=Humid tropics. USM&C=US Midwest and Canada; SB&A=South Brazil, Paraguay, Uruguay and Argentina; NWE=Northwest Europe; WANA=West Asia and North Africa; SSA=Sub-Saharan Africa; CHINA=Mainland China; IGP=Indo-Gangetic Plain; SEA=Southeast Asia.

**Supplementary Figure 4.** Screen capture of web-page of the online survey (<http://globalcrophealth.org>) for wheat, and accompanying explanatory text from the web-page.

**Supplementary Table 1.** List of contributors to the Global Survey on Crop Losses.

**Supplementary Table 2.** Characterisation of pathogens and pests. Common and scientific names, emergence status, number of survey responses, extent and diversity.

**Supplementary Table 3.** Crop loss estimates. Losses by individual pests and pathogens globally and in food security hotspots.

**Supplementary Table 4.** Summary of analyses on contingency tables. Chi-square analyses and interpretations to examine different factors related to global crop losses.

**Supplementary Table 5.** Interpretations of correspondence analyses. Main statistical results and their interpretation.

**Supplementary Table 6.** Outputs of correspondence analyses.

**Supplementary Note 1.** Email sent by Serge Savary, Vice-President of the ISPP and Chair of the ISPP Subject Matter Committee on Crop Losses to the members of the ISPP.

**Supplementary Note 2.** Note published in the ISPP Newsletter of November 2016<sup>49</sup>, republished with permission of the ISPP, announcing the conduct of the survey to the total membership of the ISPP.

### **Supplementary References**

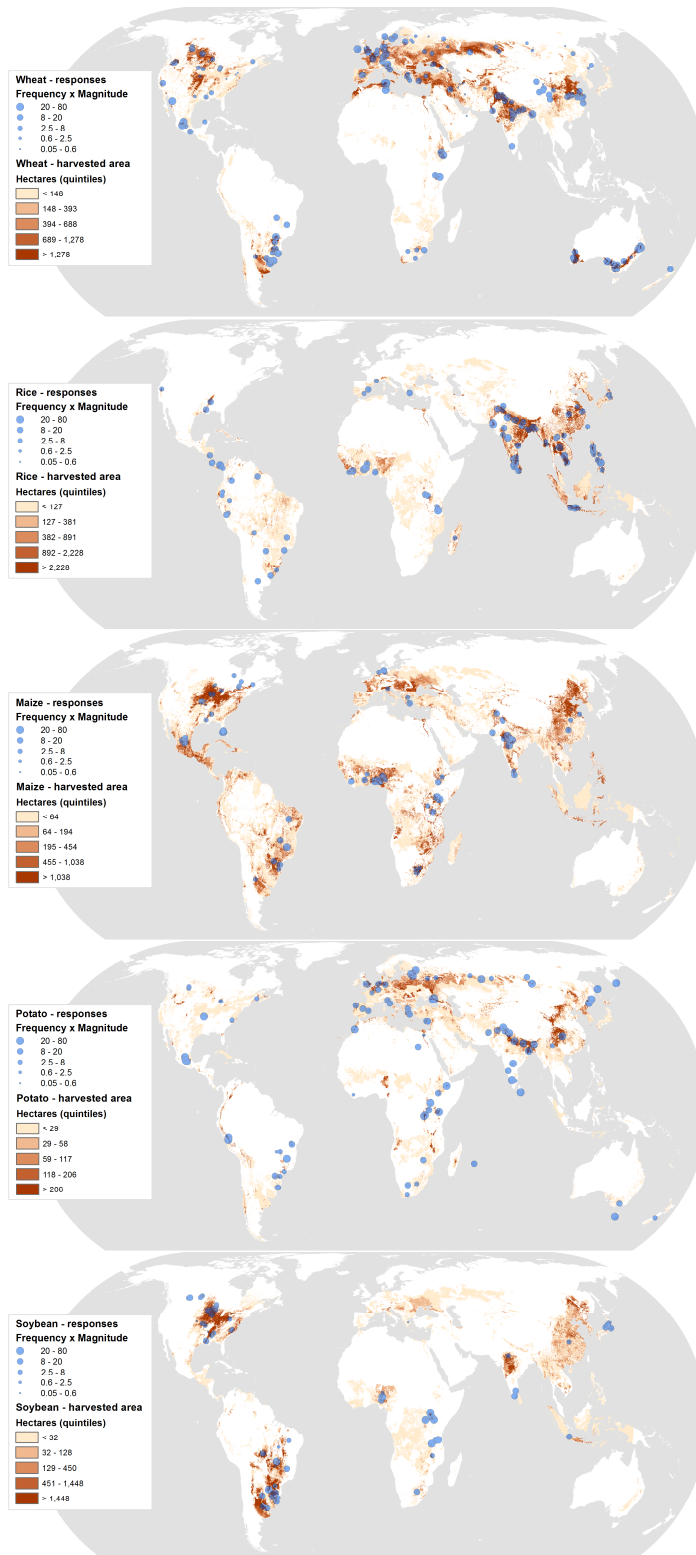

**Supplementary Figure 1. Survey responses and crop area.** Each map shows the approximate location of survey responses per crop. Land area from the Global Administrative Areas Database<sup>54</sup>. Background shows the harvested area per crop<sup>55</sup> in quintiles. Symbol size scaled by the product of crop loss magnitude and crop loss frequency.

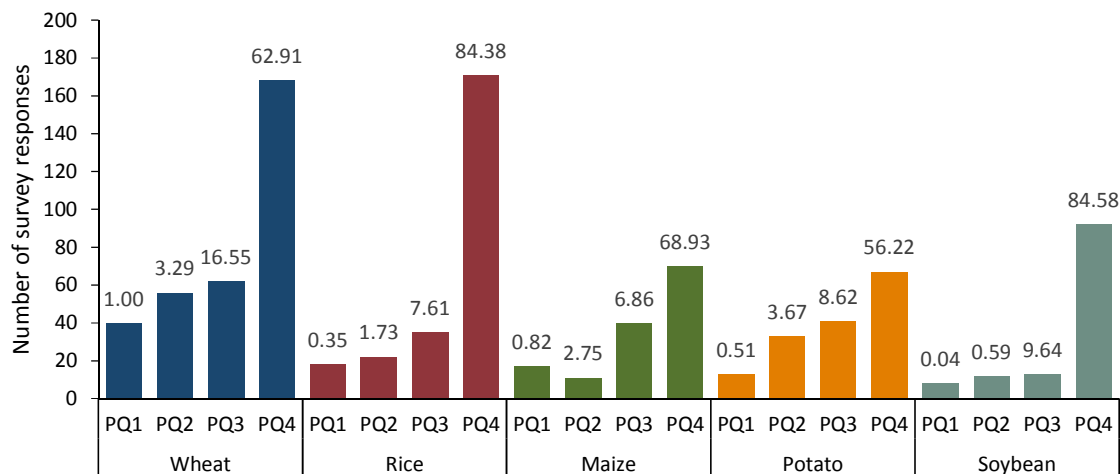

**Supplementary Figure 2.** Bar chart of distributions of survey responses by crop and by increasing quartiles of national crop production. PQ1: countries with national production below the first quartile; PQ2: countries with national production between the first and the second quartile (i.e., the median); PQ3: countries with national production between the second (i.e., the median) and the third quartile; PQ4: countries with national production above the third quartile. Percentage figures at the top of the bars indicate the proportion of world production (not of the total production covered by the survey) of each crop accounted for by successive groups of countries.

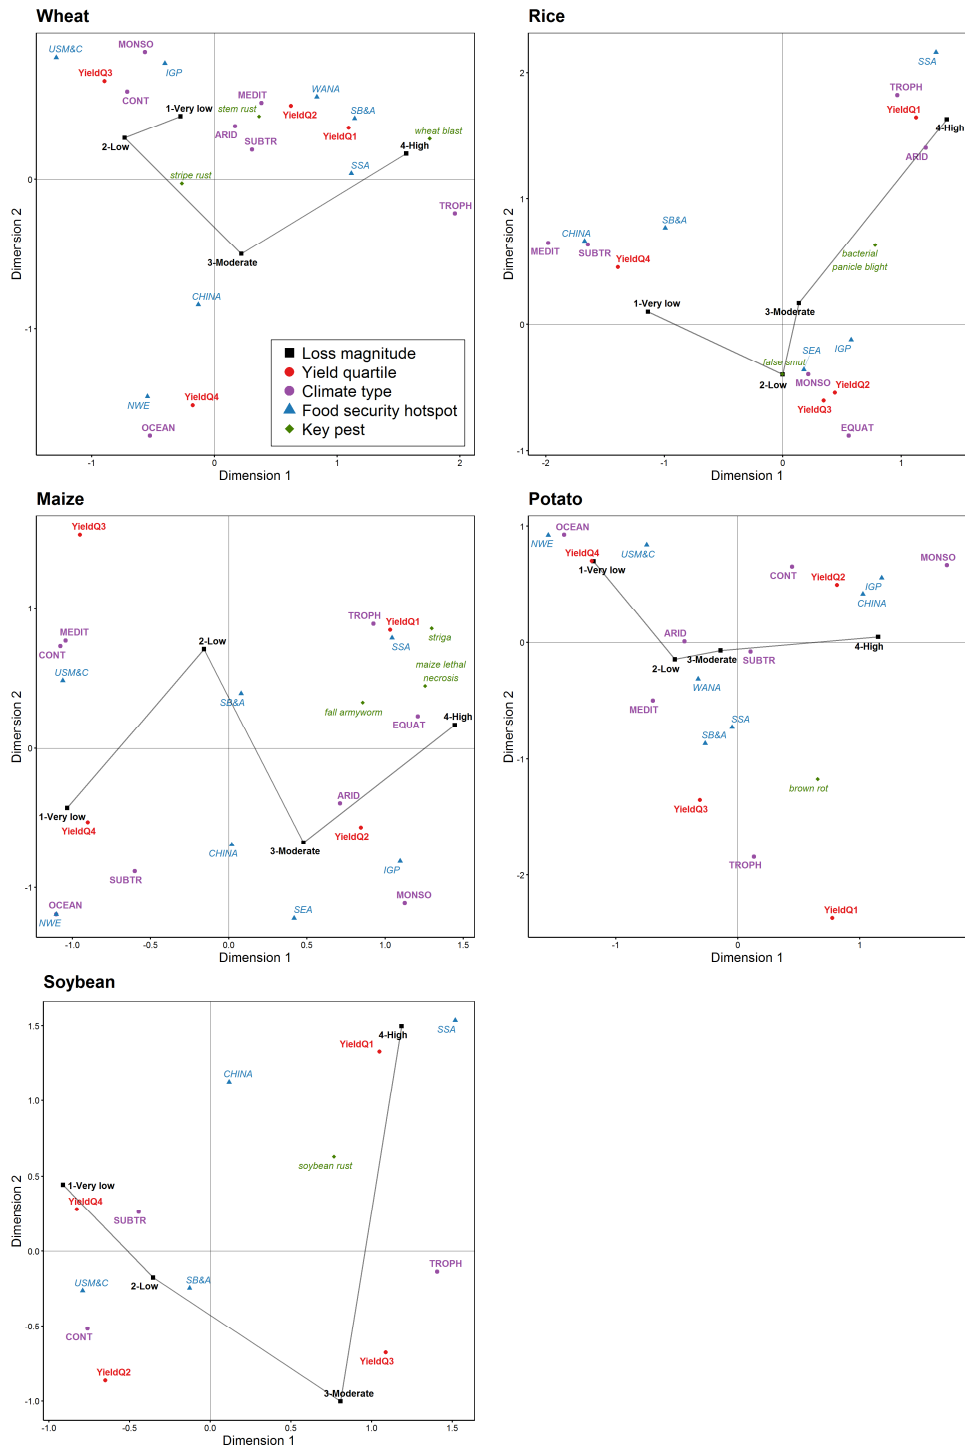

**Supplementary Figure 3.** Crop specific associations between losses, yield, climate, food security hotspots and key pests. Each panel is a correspondence analysis map based on the survey responses for that crop. Active variables (loss magnitude, yield quartiles, climate type) are in bold and supplemental variables (food security hotspot, key pests) are in italics. ARID=Arid; CONT=Humid continental; EQUAT=Equatorial; MEDIT= Mediterranean; MONSO= Monsoon; OCEAN=Oceanic; SUBTR=Subtropics; TROPH=Humid tropics. USM&C=US Midwest and Canada; SB&A=South Brazil, Paraguay, Uruguay and Argentina; NWE=Northwest Europe; WANA=West Asia and North Africa; SSA=Sub-Saharan Africa; CHINA=Mainland China; IGP=Indo-Gangetic Plain; SEA=Southeast Asia.

## Expert Assessment on Global Wheat Health

1) Move the red marker to the approximate location where the pest or disease occurred. You can also zoom in and/or type the name of the location.



2) Pest/disease name \*

If you choose "Other", you will be asked to provide the name

3) Frequency of losses \*  Does not occur  
 Every season  
 Every other season  
 One season in five  
 Less frequent than one season in five  
Select the option that best represents the frequency

4) Level of yield losses \*  < 1% (less than 1%)  
 1 - 5%  
 5 - 20%  
 20 - 60%  
 > 60% (more than 60%)  
Select the option that best represents the loss

5) Your full name

To acknowledge your contribution in any report from this survey

6) Your email

You will receive a copy of your responses

7) Your institute

To acknowledge your institute in any report from this survey

**Please check your responses and the map location before you submit the survey**

### Global Crop Health Survey

You are invited to contribute to a global survey on the losses caused by crop diseases and pests. If you would like to participate in this global effort, **please use the links on the left to submit information for one or more of the main staple crops**. The questionnaire has been devised to be simple and flexible, so that you would need as little of your time to provide inputs. If you have any queries about this survey, please [email us](mailto:us).

### Background

Quantification of the importance of crop diseases and pests is a necessary first step towards better understanding of crop health and its management. However, the information pertaining to the losses caused by plant diseases and pests in agriculture is fragmented, heterogeneous, and is very incomplete. Undertaking this survey is a project that has been considered for a long time. It has first been discussed by the Crop Loss Subject Matter Committee of the International Society for Plant Pathology during its first meeting in August 2013 in Beijing. Documenting the importance of crop diseases and pests is also one goal of several international research networks, such as AgMiP and MacSur.

### About the survey

This survey is intended to help document crop losses in major world crops. As you will see, the information sought on each crop disease or pest (location, frequency and loss) is very simplified, in order to both reduce the time required to answering the questionnaire, and to generate homogeneous information across multiple diseases and pests of several crops.

**The survey also asks you to provide your name, institute and e-mail address. Please note that providing this information is optional. However, providing this information will enable us to recognize your valuable contribution to this survey in future reports.**

Hopefully, this survey will collect as many inputs from numerous contributors worldwide, on as many diseases and pests as possible. **The survey will end on 31 Jan 2017. If the survey is successful and we obtain a sufficient number of responses, we will generate a global crop health report which will be made public by 31 Apr 2017. The report will contain summarised crop health assessments, where individual contributions will not be presented, but your contribution will be explicitly acknowledged.**

S. Savary, INRA, Centre INRA de Toulouse, France  
 A. Nelson, ITC, University of Twente, The Netherlands  
 L. Willocquet, INRA, Centre INRA de Toulouse, France  
 Sarah Pethybridge, Cornell University, USA  
 Asimina Mila, North Carolina State University, USA  
 Paul Esker, University of Costa Rica

**Supplementary Figure 4.** Screen capture of web-page of the online survey (<http://globalcrophealth.org>) for wheat, and accompanying explanatory text from the web-page.

**Supplementary Table 1. List of contributors to the Global Survey on Crop Losses. Listed alphabetically by surname.**

| <b>Name*</b>                      | <b>Country</b>  | <b>Institution</b>                                                                        |
|-----------------------------------|-----------------|-------------------------------------------------------------------------------------------|
| Araz Abdullah                     | Australia       | Curtin University, Centre for Crop and Disease Management                                 |
| Adewale Adetayo                   | Nigeria         | Ministry of Agriculture Ogun State Nigeria                                                |
| Dante Adorada                     | Australia       | University of Southern Queensland, Centre for Crop Health                                 |
| Vanina Alemandri                  | Argentina       | IPAVE CIAP INTA (Instituto Nacional de Tecnología Agropecuaria)                           |
| Shaukat Ali                       | USA             | South Dakota State University                                                             |
| Thomas W. Allen                   | USA             | Mississippi State University                                                              |
| Eduardo Alves                     | Brazil          | Universidade Federal de Lavras                                                            |
| Lamia Aouini                      | The Netherlands | WUR (Wageningen University and Research)                                                  |
| Christos Athanassiou              | Greece          | University of Thessaly                                                                    |
| Renuka Nilmini Attanayake         | Sri Lanka       | University of Kelaniya                                                                    |
| Julián Ayala                      | Spain           | AIMCRA (Asociación de Investigación para la Mejora del Cultivo de la Remolacha Azucarera) |
| Arun Balasubramaniam              | India           | Banaras Hindu University                                                                  |
| Ranjit Bandyopadhyay              | Nigeria         | IITA (International Institute of Tropical Agriculture)                                    |
| Biruta Bankina                    | Latvia          | Latvia University of Agriculture                                                          |
| Robert Beiriger                   | USA             | University of Florida                                                                     |
| Samia Berraies                    | Tunisia         | INRAT (National Institute of Agricultural Research of Tunisia)                            |
| Suma S. Biradar                   | India           | University of Agricultural Sciences, Dharwad Karnataka                                    |
| Leonardo Silva Boiteux            | Brazil          | Embrapa Vegetable Crops (Brazilian Agricultural Research Corporation)                     |
| Claude Bragard                    | Belgium         | Université Catholique de Louvain                                                          |
| Toby Bruce                        | UK              | Rothamsted Research                                                                       |
| Adalberto Correa Cafe Filho       | Brazil          | Universidade de Brasilia                                                                  |
| Nancy Castilla                    | Philippines     | IRRI (International Rice Research Institute)                                              |
| Xianming Chen                     | USA             | USDA ARS                                                                                  |
| Angela Cherunya                   | Kenya           | KALRO (Kenya Agriculture and Livestock Research Organization)                             |
| Godfree Chigeza                   | Nigeria         | IITA (International Institute of Tropical Agriculture)                                    |
| Il-Ryong Choi                     | Philippines     | IRRI (International Rice Research Institute)                                              |
| Michalakis Christoforou           | Cyprus          | Cyprus University of Technology                                                           |
| Glenda Clezy                      | Canada          | Saskatchewan Pulse Growers                                                                |
| Fernando Correa                   | Colombia        | CIAT (International Center for Tropical Agriculture)                                      |
| Leila Maria Costamilan            | Brazil          | Embrapa Trigo (Brazilian Agricultural Research Corporation)                               |
| Eric Cother                       | Australia       | New South Wales Department of Primary Industries                                          |
| Gilles Couleaud                   | France          | ARVALIS (French Arable Crops R&D Institute)                                               |
| Henry Creissen                    | Ireland         | Teagasc (The Agriculture and Food Development Authority)                                  |
| Leonardo Crespo-Herrera           | Mexico          | CIMMYT (International Maize and Wheat Improvement Center)                                 |
| Adriano Augusto de Paiva Custódio | Brazil          | Instituto Agronômico do Paraná                                                            |
| Dagma Dionísia da Silva           | Brazil          | Embrapa maize and sorghum (Brazilian Agricultural Research Corporation)                   |
| Frederick K. Danso                | UK              | Department of Food and Agriculture                                                        |
| Matthias Daub                     | Germany         | Julius Kuehn Institute                                                                    |
| Emerson Del Ponte                 | Brazil          | Universidade Federal de Viçosa                                                            |
| Matthew Denton-Giles              | Australia       | Centre for Crop and Disease Management Curtin University                                  |
| Ruth Dill-Macky                   | USA             | University of Minnesota                                                                   |
| Jessica Dohmen-Vereijssen         | New Zealand     | New Zealand Institute for Plant and Food Research                                         |
| Anne Dorrance                     | USA             | The Ohio State University                                                                 |
| Daniel Dostaler                   | Canada          | University Laval                                                                          |
| Benjamin Dumont                   | Belgium         | Gembloux Agro Bio Tech                                                                    |
| Etienne Duveiller                 | Côte d'Ivoire   | AfricaRice                                                                                |
| Jacqueline Edwards                | Australia       | Agriculture Victoria                                                                      |
| Juan Pablo Edwards Molina         | Brazil          | ESALQ USP (Luiz de Queiroz College of Agriculture, University of São Paulo)               |
| Oliver Ellingham                  | UK              | University of Reading                                                                     |
| Luis Espino                       | USA             | University of California Cooperative Extension                                            |
| Ieuan Evans                       | USA             | Private consultant                                                                        |

|                            |                    |                                                                              |
|----------------------------|--------------------|------------------------------------------------------------------------------|
| Bert Evenhuis              | The Netherlands    | WUR (Wageningen University and Research)                                     |
| Washiq Faisal              | Bangladesh         | IRRI (International Rice Research Institute)                                 |
| Mohamed Moez Fakhfakh      | Tunisia            | National Institute of field crops                                            |
| Travis Faske               | USA                | University of Arkansas                                                       |
| Andrea Ficke               | Norway             | NIBIO                                                                        |
| Alexey Filippov            | Russian Federation | All Russian Research Institute of Phytopathology                             |
| John Fletcher              | New Zealand        | New Zealand Institute for Plant and Food Research                            |
| Gregory Forbes             | China              | CIP (International Potato Center)                                            |
| Gabriela Morel Gadea       | Paraguay           | IPTA (Instituto Paraguayo de Tecnología Agraria)                             |
| Tatiana Gagkaeva           | Russian Federation | All Russian Institute of Plant Protection                                    |
| Fernanda Gamba             | Uruguay            | Facultad de Agronomía                                                        |
| Seelavarn Ganeshan         | Mauritius          | Mauritius Sugarcane Industry Research Institute                              |
| Philipp Gannibal           | Russian Federation | All Russian Institute of Plant Protection                                    |
| Denis Gaucher              | France             | ARVALIS (French Arable Crops R&D Institute)                                  |
| Dattatray Gawade           | India              | Mahatma Phule Krishi Vidyapeeth Maharashtra India                            |
| Alaerson Maia Geraldine    | Brazil             | Instituto Federal Goiano                                                     |
| Claudia Vieira Godoy       | Brazil             | Embrapa (Brazilian Agricultural Research Corporation)                        |
| Jos Groten                 | The Netherlands    | WUR (Wageningen University and Research)                                     |
| Russell L. Groves          | USA                | University of Wisconsin                                                      |
| Elena Gulyaeva             | Russian Federation | All Russian Institute of Plant Protection                                    |
| Ashish Kumar Gupta         | India              | IARI (Indian Agricultural Research Institute)                                |
| Göran Gustafsson           | Sweden             | Swedish Board of Agriculture                                                 |
| Michael Harding            | Canada             | Alberta Agriculture and Forestry                                             |
| Xinyao He                  | Mexico             | CIMMYT (International Maize and Wheat Improvement Center)                    |
| Andrea Hills               | Australia          | Dept Agriculture and Food Western Australia                                  |
| Dave Hodson                | Ethiopia           | CIMMYT (International Maize and Wheat Improvement Center)                    |
| Grant Hollaway             | Australia          | Agriculture Victoria                                                         |
| Clayton A. Hollier         | USA                | Louisiana State University                                                   |
| Nyo Me Htwe                | Philippines        | IRRI (International Rice Research Institute)                                 |
| Touseff Hussain            | India              | ICAR Indian Agricultural Research Institute New Delhi                        |
| Agape Ishabakaki           | Tanzania           | Research and Development Network                                             |
| Kiyoshi Ishiguro           | Japan              | National Agricultural Center for Tohoku Region, Morioka, Iwate               |
| Jai Prakash Jaiswal        | India              | G B Pant University of Agriculture and Technology Pantnagar India            |
| Mohammad Reza Jalal Kamali | Iran               | CIMMYT (International Maize and Wheat Improvement Center)                    |
| Prashant Jambhulkar        | India              | Maharana Pratap University of Agriculture and Technology Udaipur India       |
| Douglas J. Jardine         | USA                | Kansas State University                                                      |
| Stewart Jennings           | UK                 | University of Leeds                                                          |
| Fernando Cezar Juliatti    | Brazil             | Uberlândia Federal University                                                |
| Santoso Kadrawi            | Indonesia          | Indonesian Center for Rice Research                                          |
| George Karaoglanidis       | Greece             | Aristotelian University of Thessaloniki                                      |
| Ute Kastirr                | Germany            | Julius Kühn Institute, Federal Research Centre for Cultivated Plants         |
| Masayasu Kato              | Japan              | JIRCAS (Japan International Research Center for Agricultural Sciences)       |
| Shakiro Adewale Kazeem     | Nigeria            | Nigeria Agricultural Quarantine Service                                      |
| Yodit Kebede               | The Netherlands    | WUR (Wageningen University and Research)                                     |
| Thomas Kelly Turkington    | Canada             | Agriculture and AgriFood Canada                                              |
| Aleksandr Khiutti          | Russian Federation | All Russian Institute of Plant Protection                                    |
| Zakir Khursheed            | India              | Sher-e-Kashmir University of Agricultural Sciences and Technology of Kashmir |
| J Kumar                    | India              | G B Pant University of Agriculture and Technology Pantnagar India            |
| Lava Kumar                 | Nigeria            | IITA (International Institute of Tropical Agriculture)                       |
| Sundeep Kumar              | India              | National Bureau of Plant Genetic Resources New Delhi                         |
| Uttam Kumar                | India              | Borlaug Institute for South Asia                                             |
| Susamoy Kundu              | India              | Bidhan Chandra Krishi Viswavidyalaya                                         |
| Marcos Lana                | Germany            | ZALF (Leibniz Centre for Agricultural Landscape Research)                    |
| Douglas Lau                | Brazil             | Embrapa (Brazilian Agricultural Research Corporation)                        |



|                                     |              |                                                                                      |
|-------------------------------------|--------------|--------------------------------------------------------------------------------------|
| Miguel Angel Lavilla                | Argentina    | National University of Northwestern Buenos Aires Province                            |
| Maria Imaculada Pontes Moreira Lima | Brazil       | Embrapa Trigo (Brazilian Agricultural Research Corporation)                          |
| Anders Lindgren                     | Sweden       | Jordbruksverket                                                                      |
| Tai Guo Liu                         | China        | Institute of Plant Protection of Chinese Academy of Agricultural Sciences            |
| Aleksandre Loladze                  | Mexico       | CIMMYT (International Maize and Wheat Improvement Center)                            |
| Carlos Alberto Lopes                | Brazil       | Embrapa (Brazilian Agricultural Research Corporation)                                |
| Jagjeet Lore                        | India        | Punjab Agricultural University Ludhiana India                                        |
| Zhanhong Ma                         | China        | China Agricultural University                                                        |
| Zhonghua Ma                         | China        | Zhejiang University                                                                  |
| Khaled Makkouk                      | Lebanon      | National Council for Scientific Research                                             |
| Febina Mathew                       | USA          | South Dakota State University                                                        |
| Sarra Ben MBarek                    | Tunisia      | Center of Biotechnology of Borj Cédria                                               |
| Bruce A. McDonald                   | Switzerland  | Plant Pathology Group ETH Zurich                                                     |
| Ana María Pesqueira Méndez          | Spain        | Universidad de Santiago de Compostela                                                |
| Walter R. Meza                      | Belgium      | Gembloux Agro Bio Tech                                                               |
| Thomas Miedaner                     | Germany      | University of Hohenheim, State Plant Breeding Institute                              |
| Asimina Mila                        | USA          | North Carolina State University                                                      |
| Eduardo S.G. Mizubuti               | Brazil       | Universidade Federal de Vicosa                                                       |
| Atef Mohamed                        | Egypt        | Fayoum University                                                                    |
| Kalyan K. Mondal                    | India        | ICAR Indian Agricultural Research Institute New Delhi                                |
| Alexey Morgounov                    | Turkey       | CIMMYT (International Maize and Wheat Improvement Center)                            |
| Gloria Mosquera                     | Colombia     | CIAT (International Center for Tropical Agriculture)                                 |
| Daren Mueller                       | USA          | Iowa State University                                                                |
| Norma Mujica                        | Peru         | CIP (International Potato Center)                                                    |
| Harun Murithi                       | Tanzania     | IITA (International Institute of Tropical Agriculture)                               |
| Norman Muzhinji                     | South Africa | University of Pretoria, South Africa                                                 |
| Meshack Mwenda                      | Tanzania     | Agricultural Research Institute Uyole Mbeya                                          |
| Bitá Naseri                         | Iran         | Kermanshah Agricultural and Natural Resources Research Center                        |
| Kedar Nath                          | India        | Navsari Agricultural University                                                      |
| Nilceu R.X. de Nazareno             | Brazil       | Instituto Agronomico do Parana                                                       |
| Innocent Ndikumana                  | Rwanda       | Rwanda Agriculture Board                                                             |
| Stephen Neate                       | Australia    | University of Southern Queensland                                                    |
| Cley Donizeti Martins Nunes         | Brazil       | Embrapa Clima Temperado (Brazilian Agricultural Research Corporation)                |
| Sunao Ochi                          | Japan        | National Agriculture and Food Research Organization                                  |
| Christopher Yao Ocloo               | Ghana        | Plant Protection and Regulatory Services Ministry of Food and Agriculture            |
| Godfried Ohene-Mensah               | Ghana        | Crops Research Institute                                                             |
| Ricardo Oliva                       | Philippines  | IRRI (International Rice Research Institute)                                         |
| Richard Oliver                      | Australia    | Centre for Crop and Disease Management, Curtin University                            |
| Kirsty Owen                         | Australia    | University of Southern Queensland                                                    |
| Ayu Kartini Parawansa               | Indonesia    | Muslim University of Indonesia                                                       |
| Monica Parker                       | Peru         | CIP (International Potato Center)                                                    |
| Salina Parvin Banu                  | Bangladesh   | BARI (Bangladesh Agricultural Research Institute)                                    |
| Silvia Pereyra                      | Uruguay      | INIA (National Institute of Agricultural Research of Uruguay)                        |
| Willmer Perez Barrera               | Peru         | CIP (International Potato Center)                                                    |
| Bui Xuan Phong                      | Vietnam      | Plant Protection Department Vietnam                                                  |
| Danilo Batista Pinho                | Brazil       | Universidade de Brasilia                                                             |
| T.L. Prakasha                       | India        | IARI (Indian Agricultural Research Institute) Regional Station Indore Madhya Pradesh |
| Godfried J. Prinsloo                | South Africa | Agricultural Research Council Small Grain Institute                                  |
| Alejandro Rago                      | Argentina    | INTA (Instituto Nacional de Tecnología Agropecuaria)                                 |
| Senthil Ramu                        | India        | Central Integrated Pest Management Centre Vijayawada                                 |
| Angel Rebollar Alviter              | Mexico       | Universidad Autonoma Chapingo                                                        |
| Abdul Rehman                        | Pakistan     | University of Agriculture, Faisalabad Pakistan                                       |
| Ailton Reis                         | Brazil       | Embrapa                                                                              |
| Elei Melo Reis                      | Brazil       | OR melhoramento de sementes Ltda                                                     |

|                            |                 |                                                                           |
|----------------------------|-----------------|---------------------------------------------------------------------------|
| Bert Rijk                  | The Netherlands | WUR (Wageningen University and Research)                                  |
| Alison Robertson           | USA             | Iowa State University                                                     |
| Gianfranco Romanazzi       | Italy           | Marche Polytechnic University                                             |
| Vittorio Rossi             | Italy           | Department of Sustainable Crop Production, University of Piacenza         |
| Hannah Rostad              | Australia       | University of Southern Queensland                                         |
| Concepcion Rubies Autonell | Italy           | Department of Agricultural Sciences, Università di Bologna                |
| Jason Rudd                 | UK              | Rothamsted Research                                                       |
| M.S. Saharan               | India           | IARI (Indian Agricultural Research Institute) New Delhi                   |
| Flavio Santana             | Brazil          | Embrapa (Brazilian Agricultural Research Corporation)                     |
| Serge Savary               | France          | INRA (French National Institute for Agricultural Research)                |
| Parthasarathy Seethapathy  | India           | Tamil Nadu Agricultural University                                        |
| Ane Sesma                  | Spain           | Centre for Plant Biotechnology and Genomics                               |
| S.K. Sethi                 | India           | Haryana Agricultural University India                                     |
| Rajiv Sharma               | Mexico          | CIMMYT (International Maize and Wheat Improvement Center)                 |
| Arslan Shehroz             | Pakistan        | University of Agriculture, Faisalabad                                     |
| Meena Shekhar              | India           | Indian Institute of Maize Research New Delhi                              |
| Abubacker Siddick          | India           | Hand in Hand India                                                        |
| Hamood Ahmed Siddiqui      | Pakistan        | PPSL                                                                      |
| Richard W. Smiley          | USA             | Oregon State University                                                   |
| Damon Smith                | USA             | University of Wisconsin                                                   |
| Marcella Viana de Sousa    | Brazil          | Monsanto, Brazil                                                          |
| Gomathinayagam Subramanain | Guyana          | University of Guyana                                                      |
| Frédéric Suffert           | France          | INRA (French National Institute for Agricultural Research)                |
| W. Tadesse                 | Turkey          | ICARDA (International Center for Agricultural Research in the Dry Areas)  |
| Oliver Boye Teekpeh        | Liberia         | Ministry of Agriculture, Liberia                                          |
| Didier Tharreau            | France          | CIRAD (Agricultural Research for Development)                             |
| Kelly Tiller               | Canada          | Syngenta Canada Inc                                                       |
| Ruud Timmer                | The Netherlands | WUR (Wageningen University and Research)                                  |
| Vicki L. Tolmay            | South Africa    | Agricultural Research Council Small Grain Institute                       |
| Juan Manuel Tovar-Pedraza  | Mexico          | Universidad Autonoma Chapingo                                             |
| Atma Nand Tripathi         | India           | ICAR India Institute of Vegetable Research IIVR, Varanasi UP              |
| Dimitrios Tsitsigiannis    | Greece          | Agricultural University of Athens                                         |
| Anne D. Turner             | Tanzania        | Independent Consultant                                                    |
| Gupta Vadakattu            | Australia       | CSIRO (Commonwealth Scientific and Industrial Research Organisation)      |
| Johnnie van den Berg       | South Africa    | North West University South Africa                                        |
| Jacquie E. van der Waals   | South Africa    | University of Pretoria                                                    |
| Joseph-Alexander Verreet   | Germany         | Institute of Phytopathology, University of Kiel Germany                   |
| Antonio Vicent             | Spain           | IVIA (Instituto Valenciano de Investigaciones Agrarias)                   |
| Hugh Wallwork              | Australia       | SARDI (South Australian Research and Development Institute)               |
| Jianhua Wang               | China           | Shanghai Academy of Agricultural Sciences                                 |
| Shiwen Wang                | China           | CNRRI (China National Rice Research Institute)                            |
| K. L. Wasantha Kumara      | Sri Lanka       | University of Ruhuna                                                      |
| Johnson Belamai Weefah     | Liberia         | Cuttington University                                                     |
| Caroline Wesp Guterres     | Brazil          | Cooperativa Central Gaucha Ltda                                           |
| Jonathan S. West           | UK              | Rothamsted Research                                                       |
| Calum Wilson               | Australia       | University of Tasmania                                                    |
| Kaoru Zenbayashi-Sawata    | Japan           | National Agriculture and Food Research Organization                       |
| Yilin Zhou                 | China           | Institute of Plant Protection of Chinese Academy of Agricultural Sciences |
| Xiaoyang Zhu               | Canada          | Ottawa Research and Development Centre                                    |

\*An additional 31 responses were submitted anonymously.

**Supplementary Table 2. Characterisation of pathogens and pests.** Common and scientific names, emergence status, number of survey responses, extent and diversity.

| Common name <sup>*,†</sup>                            | Latin or scientific name                                                                                                                                                                                               | Number of responses | Extent Code <sup>‡</sup> | Explanation - Extent                                                                                                                     | Diversity code <sup>§</sup> | Explanation - Diversity                                 |
|-------------------------------------------------------|------------------------------------------------------------------------------------------------------------------------------------------------------------------------------------------------------------------------|---------------------|--------------------------|------------------------------------------------------------------------------------------------------------------------------------------|-----------------------------|---------------------------------------------------------|
| <b>Wheat</b>                                          |                                                                                                                                                                                                                        |                     |                          |                                                                                                                                          |                             |                                                         |
| Aphids <sup>a</sup>                                   | <i>Sitobion avenae</i> ,<br><i>Rhopalosiphum padi</i> ,<br><i>Diuraphis noxia</i> <sup>72</sup>                                                                                                                        | 16                  | L                        | Local: Long dispersal ability but local outbreaks associated with crop management. <sup>72</sup>                                         | U                           | No deployed host plant resistance (HPRs). <sup>72</sup> |
| Aster Yellows <sup>b</sup>                            | <i>Aster yellows phytoplasma</i> <sup>85</sup>                                                                                                                                                                         | 1                   | L                        | Local: Wheat is not considered a main host. Several possible flying vectors with limited dispersal range. <sup>85</sup>                  | U                           | No major diversity factor reported. <sup>85</sup>       |
| Barley yellow dwarf (BYD) <sup>a</sup>                | BYD viruses <sup>72,73,86</sup>                                                                                                                                                                                        | 14                  | G <sup>‡</sup>           | General: Transmission by flying insects. <sup>72,73</sup>                                                                                | U                           | No major diversity factor reported. <sup>72,73</sup>    |
| Black Point (multiple pathogens) <sup>b</sup>         | <i>Alternaria</i> spp.,<br><i>Cochliobolus sativus</i> ,<br><i>Cladosporium</i> spp.,<br><i>Epicoccum</i> spp., <i>Fusarium</i> spp.,<br><i>Stemphylium</i> spp.,<br><i>Pyrenophora tritici-repentis</i> <sup>87</sup> | 1                   | L                        | Local: Seed borne. Local dispersal. <sup>87</sup>                                                                                        | U                           | No major diversity factor reported. <sup>87</sup>       |
| Heterodera avenae (Cereal cyst nematode) <sup>b</sup> | <i>Heterodera avenae</i> <sup>88</sup>                                                                                                                                                                                 | 1                   | F                        | Focal: Soil borne. <sup>88</sup>                                                                                                         | U                           | No major diversity factor reported. <sup>88</sup>       |
| Crown and Root Rot <sup>b</sup>                       | <i>Fusarium</i> spp. <sup>89</sup>                                                                                                                                                                                     | 5                   | G                        | General: Air borne dispersal of spores over long distances. Survival in residues. <sup>89</sup>                                          | U                           | No major diversity factor reported. <sup>89</sup>       |
| False armyworm <sup>b</sup>                           | <i>Leucania loreyi</i> Syn.<br><i>Mythimna loreyi</i> <sup>90</sup>                                                                                                                                                    | 1                   | L                        | Local: Strong flying dispersal ability, although outbreaks are initiated from relatively limited (dense vegetation) areas. <sup>90</sup> | U                           | No major diversity factor reported. <sup>90</sup>       |
| Fusarium head blight (FHB) – Scab <sup>a</sup>        | <i>Fusarium</i> spp.,<br><i>Microdochium</i> spp. <sup>72,73</sup>                                                                                                                                                     | 41                  | G                        | General: Air borne dispersal of spores over long distances. Survival in residues. <sup>72,73</sup>                                       | U                           | No (or limited) deployed HPRs. <sup>72,73</sup>         |
| Fusarium seedling blight <sup>b</sup>                 | <i>Fusarium</i> spp.,<br><i>Monographella nivalis</i> <sup>91</sup>                                                                                                                                                    | 1                   | L                        | Local: Soil borne and seed borne with limited dispersal. <sup>91</sup>                                                                   | U                           | No major diversity factor reported. <sup>91</sup>       |
| (Grass) leaf miner <sup>b</sup>                       | <i>Agromyza ocularis</i> <sup>92</sup>                                                                                                                                                                                 | 1                   | L                        | Local: Only local infestations reported. <sup>92</sup>                                                                                   | U                           | No major diversity factor reported. <sup>92</sup>       |
| Heterodera filipjevi <sup>b</sup>                     | <i>Heterodera filipjevi</i> <sup>93</sup>                                                                                                                                                                              | 1                   | F                        | Focal: Soil borne. <sup>93</sup>                                                                                                         | U                           | No major diversity factor reported. <sup>93</sup>       |
| Leaf (brown) rust <sup>a</sup>                        | <i>Puccinia triticina</i> <sup>72,73,94</sup>                                                                                                                                                                          | 33                  | G                        | General: Air borne dispersal of spores over long distances. <sup>72,73</sup>                                                             | H                           | Deployed HPRs - many genes. <sup>72,73</sup>            |
| Pratylenchus neglectus <sup>b</sup>                   | <i>Pratylenchus neglectus</i> <sup>95</sup>                                                                                                                                                                            | 1                   | F                        | Focal: Soil borne. <sup>95</sup>                                                                                                         | U                           | No major diversity factor reported. <sup>95</sup>       |
| Pratylenchus thornei <sup>b</sup>                     | <i>Pratylenchus thornei</i> <sup>96</sup>                                                                                                                                                                              | 3                   | F                        | Focal: Soil borne. <sup>96</sup>                                                                                                         | U                           | No major diversity factor reported. <sup>96</sup>       |
| Loose smut <sup>b</sup>                               | <i>Ustilago tritici</i> <sup>97</sup>                                                                                                                                                                                  | 1                   | L                        | Local: Seed borne. Local dispersal. <sup>97</sup>                                                                                        | U                           | No major diversity factor reported. <sup>97</sup>       |
| (Northern) armyworm <sup>b</sup>                      | <i>Mythimna separata</i> <sup>98</sup>                                                                                                                                                                                 | 1                   | L                        | Local: Strong flying dispersal ability, although outbreaks are initiated from relatively limited (dense vegetation) areas. <sup>98</sup> | U                           | No major diversity factor reported. <sup>98</sup>       |
| Powdery mildew <sup>b</sup>                           | <i>Blumeria graminis</i> f. sp. <i>tritici</i> <sup>99</sup>                                                                                                                                                           | 7                   | G                        | General: Air borne dispersal of spores over long distances. <sup>99</sup>                                                                | H                           | Deployed HPRs -many genes. <sup>99</sup>                |

|                                                |                                                                                                                             |    |   |                                                                                                                                                         |                |                                                        |
|------------------------------------------------|-----------------------------------------------------------------------------------------------------------------------------|----|---|---------------------------------------------------------------------------------------------------------------------------------------------------------|----------------|--------------------------------------------------------|
| Rhizoctonia root rot (bare patch) <sup>p</sup> | <i>Rhizoctonia solani</i> AG-8 <sup>100</sup>                                                                               | 4  | L | Local: Soil borne and limited dispersal - survival through sclerotia. <sup>100</sup>                                                                    | U              | No major diversity factor reported. <sup>100</sup>     |
| Russian wheat aphid <sup>b</sup>               | <i>Diuraphis noxia</i> <sup>101</sup>                                                                                       | 1  | G | General: Long-range flying insect. <sup>101</sup>                                                                                                       | U              | No major diversity factor reported. <sup>101</sup>     |
| Sclerotium foot and root rot <sup>b</sup>      | <i>Sclerotium rolfsii</i> Syn. <i>Athelia rolfsii</i> <sup>72</sup>                                                         | 1  | F | Focal: Soil borne. <sup>72</sup>                                                                                                                        | U              | No major diversity factor reported. <sup>72</sup>      |
| Tritici blotch <sup>a</sup>                    | <i>Zymoseptoria tritici</i> <sup>72,73,102</sup>                                                                            | 60 | G | General: Rain splash and air borne dispersal of spores over moderate distances. Survival in residues. <sup>72,73</sup>                                  | U <sup>1</sup> | No deployed HPRs. <sup>72,73</sup>                     |
| Sharp eye spot <sup>b</sup>                    | <i>Ceratobasidium cereale</i> <sup>103</sup>                                                                                | 1  | F | Focal: Soil borne. <sup>103</sup>                                                                                                                       | U              | Resistances exist - limited deployment. <sup>103</sup> |
| Spot blotch <sup>a</sup>                       | <i>Cochliobolus sativus</i> <sup>72,73,104</sup>                                                                            | 9  | G | General: Air borne dispersal of spores over moderate distances. Survival in residues. <sup>72,73</sup>                                                  | U              | No major diversity factor reported. <sup>1,3</sup>     |
| Nodorum blotch <sup>a</sup>                    | <i>Parastagonospora avenae</i> f. sp. <i>tritici</i> , <i>Parastagonospora (Phaeosphaeria) nodorum</i> <sup>72,73,105</sup> | 21 | G | General: Rain splash and air borne dispersal of spores over moderate distances. Survival in residues. <sup>72,73</sup>                                  | U              | No deployed HPRs. <sup>72,73</sup>                     |
| Stem (black) rust <sup>a,106</sup>             | <i>Puccinia graminis</i> f. sp. <i>tritici</i> <sup>72,73</sup>                                                             | 21 | G | General: Air borne dispersal of spores over long distances. <sup>72,73</sup>                                                                            | H              | Deployed HPRs several genes. <sup>72,73</sup>          |
| Stripe (yellow) rust <sup>a,107</sup>          | <i>Puccinia striiformis</i> f. sp. <i>tritici</i> <sup>72,73</sup>                                                          | 44 | G | General: Air borne dispersal of spores over long distances. <sup>72,73</sup>                                                                            | H              | Deployed HPRs - many genes. <sup>72,73</sup>           |
| Tan spot <sup>a</sup>                          | <i>Pyrenophora tritici-repentis</i> <sup>72,73</sup>                                                                        | 25 | G | General: Air borne dispersal of spores over moderate distances. Survival in residues. <sup>72,73</sup>                                                  | U              | No major diversity factor reported. <sup>72,73</sup>   |
| Wheat Blast <sup>b,108</sup>                   | <i>Pyricularia graminis-tritici</i> <sup>7,99,110</sup>                                                                     | 6  | L | Local: Seed borne. Moderate-distance aerial spore dispersal. Epidemics determined by coinciding environmental conditions and crop stage. <sup>106</sup> | U              | No deployed HPRs. <sup>106</sup>                       |
| Wheat Soil-borne mosaic <sup>b</sup>           | <i>Soilborne wheat mosaic virus (SBWMV)</i> <sup>111</sup>                                                                  | 2  | F | Focal: Soil borne. <sup>111</sup>                                                                                                                       | U              | No major diversity factor reported. <sup>111</sup>     |
| (Wheat) spindle streak mosaic <sup>b</sup>     | <i>Wheat spindle streak mosaic virus (WSSMV)</i> <sup>112</sup>                                                             | 1  | F | Focal: Soil borne. Transmitted by <i>Polymyxa graminis</i> <sup>112</sup>                                                                               | U              | No major diversity factor reported. <sup>112</sup>     |
| Wheat streak mosaic <sup>b</sup>               | <i>Wheat streak mosaic virus</i> <sup>113</sup>                                                                             | 1  | L | Local: Transmitted by wind borne mites (wheat curl mite <i>Aceria tosichella</i> ) over limited distances. <sup>113</sup>                               | U              | No major diversity factor reported. <sup>113</sup>     |

---

#### Rice

|                                           |                                                                                                 |    |   |                                                                                      |   |                                                                                         |
|-------------------------------------------|-------------------------------------------------------------------------------------------------|----|---|--------------------------------------------------------------------------------------|---|-----------------------------------------------------------------------------------------|
| Aggregate sheath spot <sup>b</sup>        | <i>Rhizoctonia oryzae-sativae</i> <sup>114</sup>                                                | 1  | L | Local: Soil borne and limited dispersal - survival through sclerotia. <sup>114</sup> | U | No major diversity factor reported. <sup>114</sup>                                      |
| Bacterial blight <sup>a</sup>             | <i>Xanthomonas oryzae</i> pv. <i>oryzae</i> <sup>74,115</sup>                                   | 36 | G | General: Dispersal through irrigation water and canals. <sup>112</sup>               | H | Diversity of varieties with HPR - Many (efficient) resistances deployed. <sup>112</sup> |
| Bacterial panicle blight <sup>b,116</sup> | <i>Burkholderia glumae</i> <sup>116</sup>                                                       | 7  | L | Local: Seed borne. Local dispersal. <sup>116</sup>                                   | U | No major diversity factor reported. <sup>116</sup>                                      |
| Bacterial sheath rot <sup>b</sup>         | <i>Acidovorax avenae</i> , <i>Pantoea ananatis</i> , <i>Burkholderia cepacia</i> <sup>117</sup> | 1  | L | Local: Seed borne. Local dispersal. <sup>117</sup>                                   | U | No major diversity factor reported. <sup>117</sup>                                      |

|                                                   |                                                                                               |    |   |                                                                                                                                                        |   |                                                                                             |
|---------------------------------------------------|-----------------------------------------------------------------------------------------------|----|---|--------------------------------------------------------------------------------------------------------------------------------------------------------|---|---------------------------------------------------------------------------------------------|
| Bakanae <sup>b</sup>                              | <i>Fusarium fujikuroi</i> <sup>74</sup>                                                       | 2  | L | Local: Seed borne and soil borne - Is also dispersed by ascospores (short distance). <sup>74</sup>                                                     | U | No major diversity factor reported. <sup>74</sup>                                           |
| Black bug <sup>b</sup>                            | <i>Scotinophara coardata</i> <sup>118</sup>                                                   | 1  | L | Local: Poor flyer and local propagation. Population densities usually low. <sup>118</sup>                                                              | U | No major diversity factor reported. <sup>118</sup>                                          |
| Blast (Leaf, neck, or panicle blast) <sup>a</sup> | <i>Pyricularia oryzae</i> <sup>74,119</sup>                                                   | 52 | G | General: air borne dispersal of conidia over moderate distances. <sup>74</sup>                                                                         | H | Many resistances deployed; heavy chemical control in some countries. <sup>74</sup>          |
| Brown plant hopper <sup>a</sup>                   | <i>Nilaparvata lugens</i> <sup>1,75</sup>                                                     | 17 | G | General: Insect flights over long distances. <sup>1,75</sup>                                                                                           | H | Partial resistances; differential effect of (inducing) pesticide campaigns. <sup>1,75</sup> |
| Brown spot <sup>a</sup>                           | <i>Cochliobolus miyabeanus</i> <sup>74,120</sup>                                              | 22 | G | General: air borne dispersal of conidia over moderate distances. Survival in residues. <sup>112</sup>                                                  | U | No major diversity factor reported. <sup>112</sup>                                          |
| False smut <sup>b,121</sup>                       | <i>Ustilaginoidea virens</i> <sup>122</sup>                                                   | 5  | G | General: Air borne dispersal of conidia over moderate distances. Survival in many different forms (incl. chlamydospores and sclerotia). <sup>122</sup> | H | Effects of hybrids in landscapes; partial resistances. <sup>122</sup>                       |
| Grassy stunt <sup>b</sup>                         | <i>Rice grassy stunt virus</i> <sup>123</sup>                                                 | 4  | L | Local: Transmission by flying vectors. Severe, however local outbreaks often associated with crop management. <sup>123</sup>                           | U | No major diversity factor reported. <sup>123</sup>                                          |
| Hoja blanca <sup>b</sup>                          | <i>Rice hoja blanca virus</i> <sup>74</sup>                                                   | 6  | L | Local: Transmission by flying vectors. Sporadic-cyclic epidemics due to genetically variable vector capacity in the insect. <sup>74,124</sup>          | U | No major diversity factor reported. <sup>74,124</sup>                                       |
| Kernel smut <sup>b</sup>                          | <i>Tilletia barclayana</i> <sup>74</sup>                                                      | 1  | L | Local: Soil borne and limited dispersal. <sup>74</sup>                                                                                                 | U | No major diversity factor reported. <sup>74</sup>                                           |
| Leaf folder <sup>b</sup>                          | <i>Cnaphalocrocis medinalis</i> <sup>75</sup>                                                 | 1  | G | General: Moderate distance spread (flights). <sup>75</sup>                                                                                             | U | No major diversity factor reported. <sup>75</sup>                                           |
| Narrow brown leaf spot <sup>b</sup>               | <i>Cercospora janseana</i> <sup>1,74</sup>                                                    | 1  | G | General: Air borne dispersal of conidia over moderate distances. Survival in residues. <sup>1,74</sup>                                                 | U | No major diversity factor reported. <sup>1,74</sup>                                         |
| Ragged stunt <sup>a</sup>                         | <i>Rice ragged stunt virus</i> <sup>74,125</sup>                                              | 7  | L | Local: Transmission by flying vectors. Severe, however local outbreaks often associated with crop management. <sup>74,125</sup>                        | U | No major diversity factor reported. <sup>74,125</sup>                                       |
| Rice sheath mite <sup>b</sup>                     | <i>Stenotarsonemus spinki</i> <sup>126</sup>                                                  | 1  | L | Local: Short-distance dispersal. Only local outbreaks reported. <sup>126</sup>                                                                         | U | No major diversity factor reported. <sup>126</sup>                                          |
| Rice tungro disease <sup>a</sup>                  | <i>Rice tungro bacilliform virus</i> and <i>Rice tungro spherical virus</i> <sup>74,127</sup> | 23 | L | Local: Transmission by flying vectors. Severe, however local outbreaks often associated with crop management. <sup>74,127</sup>                        | U | Partial resistances deployed; crop establishment synchrony in landscapes. <sup>74,127</sup> |
| Rice weevil <sup>b</sup>                          | <i>Sitophilus oryzae</i> <sup>128</sup>                                                       | 1  | L | Local: Poor flyer and local propagation. Population densities usually low. <sup>128</sup>                                                              | U | No major diversity factor reported. <sup>128</sup>                                          |

|                            |                                                                                                           |    |   |                                                                                                                                                      |   |                                                     |
|----------------------------|-----------------------------------------------------------------------------------------------------------|----|---|------------------------------------------------------------------------------------------------------------------------------------------------------|---|-----------------------------------------------------|
| Sheath blight <sup>a</sup> | <i>Rhizoctonia solani</i> <sup>74,129</sup>                                                               | 18 | G | General: Dispersal through irrigation water and canals (sclerotia). Survival in soil and residues. <sup>112</sup>                                    | U | No major diversity factor reported. <sup>112</sup>  |
| Sheath rot <sup>a</sup>    | <i>Sarocladium oryzae</i> <sup>1,74</sup>                                                                 | 12 | L | Local: Seed borne and soil (straw residue) borne. Local dispersal. <sup>1,74</sup>                                                                   | U | No major diversity factor reported. <sup>1,74</sup> |
| Stem borers <sup>a</sup>   | <i>Scirpophaga incertulas</i> ,<br><i>Chilo suppressalis</i> ,<br><i>Sesamia inferens</i> <sup>1,75</sup> | 20 | G | General: Moderate to long distance flights. <sup>1,75</sup>                                                                                          | U | No major diversity factor reported. <sup>1,75</sup> |
| Stem rot <sup>b</sup>      | <i>Sclerotium oryzae</i> <sup>74</sup>                                                                    | 1  | L | Local: Soil borne and limited dispersal - survival through sclerotia. <sup>74</sup>                                                                  | U | No major diversity factor reported. <sup>74</sup>   |
| Stripe <sup>b</sup>        | <i>Rice stripe virus</i> <sup>130</sup>                                                                   | 1  | L | Local: Transmission by flying small brown planthopper vectors. Severe, however local outbreaks often associated with crop management. <sup>130</sup> | U | No major diversity factor reported. <sup>130</sup>  |
| White grubs <sup>b</sup>   | <i>Coleoptera</i> :<br><i>Scarabaeidae</i> <sup>131</sup>                                                 | 1  | L | Local: Population densities usually low. Long life cycle. <sup>131</sup>                                                                             | U | No major diversity factor reported. <sup>131</sup>  |
| Yellow mottle <sup>b</sup> | <i>Rice yellow mottle virus</i> <sup>132</sup>                                                            | 4  | G | General: Transmission by flying insects. <sup>132</sup>                                                                                              | U | No major diversity factor reported. <sup>132</sup>  |

---

#### Maize

|                                            |                                                                     |   |   |                                                                                                              |   |                                                                |
|--------------------------------------------|---------------------------------------------------------------------|---|---|--------------------------------------------------------------------------------------------------------------|---|----------------------------------------------------------------|
| African black beetle <sup>b</sup>          | <i>Heteronychus arator</i> <sup>1,133</sup>                         | 1 | L | Local: Poor flyer and local propagation. Population densities usually low. <sup>1,133</sup>                  | U | No indication of major crop/host variability. <sup>1,133</sup> |
| African boll worm <sup>b</sup>             | <i>Helicoverpa armigera</i> <sup>134</sup>                          | 1 | L | Local: Strong flying dispersal ability, but infestations often spatially patchy and cyclical. <sup>134</sup> | U | No indication of major crop/host variability. <sup>134</sup>   |
| African stem borer <sup>a</sup>            | <i>Busseola fusca</i> , <i>Sesamia calamistris</i> <sup>1,135</sup> | 5 | L | Local: Strong flying dispersal ability, but infestations often spatially patchy and cyclical. <sup>1</sup>   | U | No indication of major crop/host variability. <sup>1</sup>     |
| Anthraxnose leaf blight <sup>b</sup>       | <i>Colletotrichum graminicola</i> <sup>76,136</sup>                 | 1 | L | Local: Soil borne and survival in crop residues. Short-distance aerial spore dispersal. <sup>76</sup>        | U | No indication of major crop/host variability. <sup>76</sup>    |
| Anthraxnose stalk rot <sup>b</sup>         | <i>Colletotrichum graminicola</i> <sup>76,136</sup>                 | 2 | L | Local: Soil borne and survival in crop residues. <sup>76</sup>                                               | U | No indication of major crop/host variability. <sup>76</sup>    |
| Asian corn borer <sup>b</sup>              | <i>Ostrinia furnacalis</i> <sup>137</sup>                           | 1 | G | General: Long-range flying insect. <sup>137</sup>                                                            | U | No indication of major crop/host variability. <sup>137</sup>   |
| Bacterial stalk rot <sup>b</sup>           | <i>Dickeya zeae</i> <sup>1,76</sup>                                 | 1 | G | General: Soil borne, but transmitted by soil and contaminated tools. <sup>76</sup>                           | U | Variability of hybrid susceptibility. <sup>76</sup>            |
| Banded leaf and sheath blight <sup>b</sup> | <i>Rhizoctonia solani</i> <sup>1,138</sup>                          | 2 | L | Local: Soil borne and limited dispersal - survival through sclerotia. <sup>138</sup>                         | U | No deployed HPR. <sup>138</sup>                                |
| Brown stripe downy mildew <sup>b</sup>     | <i>Sclerophthora rayssiae</i> var. <i>zeae</i> <sup>1,76</sup>      | 1 | F | Focal: Soil borne. Epidemics associated with heavy rains in Terai (India-Nepal). <sup>76</sup>               | H | Deployed HPRs and chemical control. <sup>76</sup>              |
| Common rust <sup>b</sup>                   | <i>Puccinia sorghi</i> <sup>139</sup>                               | 4 | G | General: Air borne dispersal of spores over long distances. <sup>139</sup>                                   | H | Deployed HPRs. <sup>139</sup>                                  |

|                                                       |                                                                                                                                                                         |    |   |                                                                                                                                                            |                |                                                                 |
|-------------------------------------------------------|-------------------------------------------------------------------------------------------------------------------------------------------------------------------------|----|---|------------------------------------------------------------------------------------------------------------------------------------------------------------|----------------|-----------------------------------------------------------------|
| Common smut <sup>b</sup>                              | <i>Ustilago maydis</i> <sup>1,76</sup>                                                                                                                                  | 3  | L | Local: Soil borne and limited dispersal. <sup>76</sup>                                                                                                     | H              | Deployed HPRs. <sup>76</sup>                                    |
| Com stunt <sup>b</sup>                                | <i>Spiroplasma kunkelii</i> <sup>1,140</sup>                                                                                                                            | 1  | L | Local: Spiroplasma transmitted by leafhopper. Only limited epidemics reported. <sup>140</sup>                                                              | U              | No major diversity factor reported. <sup>140</sup>              |
| Crazy top <sup>b</sup>                                | <i>Sclerophthora macrospora</i> <sup>76</sup>                                                                                                                           | 1  | L | Local: Soil borne and limited dispersal. <sup>76</sup>                                                                                                     | U              | No major diversity factor reported. <sup>76</sup>               |
| Cutworm <sup>b</sup>                                  | <i>Agrotis ipsilon</i> <sup>141</sup>                                                                                                                                   | 1  | L | Local: Strong flying dispersal ability, but infestations often spatially patchy and cyclical. <sup>141</sup>                                               | U              | No major diversity factor reported. <sup>141</sup>              |
| Diabrotica (beetle and rootworms) <sup>a</sup>        | <i>Diabrotica balteata</i> , <i>D. virgifera</i> , <i>D. longicornis</i> , <i>D. speciosa</i> <sup>1,142</sup>                                                          | 4  | G | General: Long-range flying insect. <sup>1</sup>                                                                                                            | U              | No major diversity factor reported. <sup>1</sup>                |
| Diplodia ear and stem rot <sup>a</sup>                | <i>Stenocarpella maydis</i> <sup>1,76</sup>                                                                                                                             | 6  | G | General: Air borne dispersal over moderate distances. Spread by infected seeds. Survival in residues. <sup>1,76</sup>                                      | U              | No major diversity factor reported. <sup>1,76</sup>             |
| European stem borer <sup>a</sup>                      | <i>Ostrinia nubilalis</i> <sup>1,143</sup>                                                                                                                              | 4  | G | General: Long-range flying insect. <sup>1</sup>                                                                                                            | U              | No major diversity factor reported. <sup>1</sup>                |
| Eyespot <sup>b</sup>                                  | <i>Kabatiella zeae</i> <sup>144</sup>                                                                                                                                   | 2  | F | Focal: Rain splash and air borne dispersal of spores over moderate distances. Survival in residues. Low occurrence of epidemics reported. <sup>1,144</sup> | U              | No major diversity factor reported. <sup>1,144</sup>            |
| Fall armyworm <sup>b,145</sup>                        | <i>Spodoptera frugiperda</i> <sup>146</sup>                                                                                                                             | 3  | G | General: Long-range flying insect. <sup>146</sup>                                                                                                          | U <sup>#</sup> | No deployed HPR, no wide scale chemical control. <sup>146</sup> |
| Fusarium and Gibberella (F&G) ear rots <sup>a</sup>   | <i>Fusarium moniliforme</i> ( <i>Gibberella fujikuroi</i> ), <i>F. graminearum</i> ( <i>Gibberella zeae</i> ) <sup>1,76,147</sup>                                       | 18 | G | General: Air borne dispersal of spores over moderate distances. Survival in residues. <sup>1,76,147</sup>                                                  | U              | No major diversity factor reported. <sup>1,76,147</sup>         |
| Fusarium and Gibberella (F&G) stalk rots <sup>a</sup> | <i>Fusarium moniliforme</i> ( <i>Gibberella fujikuroi</i> ), <i>F. graminearum</i> ( <i>Gibberella zeae</i> ) <sup>1,76</sup>                                           | 15 | G | General: Air borne dispersal of spores over moderate distances. Survival in residues. <sup>1,76</sup>                                                      | U              | No major diversity factor reported. <sup>1,76</sup>             |
| Gray leaf spot <sup>b</sup>                           | <i>Cercospora zeae-maydis</i> , <i>C. zeina</i> <sup>1,76</sup>                                                                                                         | 3  | G | General: Air borne dispersal of spores over moderate distances. Survival in residues. <sup>76</sup>                                                        | U              | No major diversity factor reported. <sup>76</sup>               |
| Head smut <sup>b</sup>                                | <i>Sphacelotheca reiliana</i> (syn. <i>Sporisorium reilianum</i> ) <sup>1,76</sup>                                                                                      | 2  | F | Focal: Soil borne. <sup>76</sup>                                                                                                                           | H              | No major diversity factor reported. <sup>76</sup>               |
| Maize lethal necrosis <sup>b,148</sup>                | Maize chlorotic mottle virus and a virus of the Potyviridae family (e.g., Wheat streak mosaic virus ; Maize dwarf mosaic virus ; Sugarcane mosaic virus) <sup>149</sup> | 2  | L | Local: Dual virus infections transmitted by multiple vectors. Contaminated soil is infective. Local epidemics reported. <sup>148,149</sup>                 | U              | No major diversity factor reported. <sup>148,149</sup>          |
| Maize streak <sup>a</sup>                             | Maize streak virus <sup>1,76</sup>                                                                                                                                      | 9  | G | General: Transmission by flying insects. <sup>1,76</sup>                                                                                                   | U              | No major diversity factor reported. <sup>1,76</sup>             |
| Mal de Río Cuarto <sup>b</sup>                        | Mal de Río Cuarto virus <sup>150</sup>                                                                                                                                  | 1  | G | General: Transmission by flying insects. <sup>150</sup>                                                                                                    | U              | No major diversity factor reported. <sup>150</sup>              |
| Mediterranean corn borer <sup>b</sup>                 | <i>Sesamia nonagrioides</i> <sup>1,151</sup>                                                                                                                            | 1  | G | General: Long-range flying insect. <sup>151</sup>                                                                                                          | U              | No major diversity factor reported. <sup>151</sup>              |
| Northern leaf blight <sup>a</sup>                     | <i>Exserohilum turcicum</i> <sup>1,76</sup>                                                                                                                             | 16 | G | General: Air borne dispersal of spores over long distances. Survival in residues. <sup>1,76</sup>                                                          | H              | Deployed HPRs. <sup>1,76</sup>                                  |

|                                         |                                                                                                                                  |    |   |                                                                                                                                             |   |                                                    |
|-----------------------------------------|----------------------------------------------------------------------------------------------------------------------------------|----|---|---------------------------------------------------------------------------------------------------------------------------------------------|---|----------------------------------------------------|
| Rajasthan downy mildew <sup>b, 5</sup>  | <i>Peronosclerospora heteropogoni</i> <sup>1,76,152</sup>                                                                        | 1  | L | Local: Soil borne and limited dispersal. <sup>76</sup>                                                                                      | H | Deployed HPRs. <sup>76</sup>                       |
| Root knot nematodes <sup>b</sup>        | <i>Meloidogyne incognita</i> , <i>M. arenaria</i> , <i>M. javanica</i> , <i>M. hapla</i> , and <i>M. chitwoodi</i> <sup>76</sup> | 1  | F | Focal: Soil borne. <sup>76</sup>                                                                                                            | U | No major diversity factor reported. <sup>76</sup>  |
| Silk fly <sup>b</sup>                   | <i>Euxesta stigmatias</i> <sup>1,153</sup>                                                                                       | 1  | F | Focal: Localised outbreaks on sweet corn. <sup>153</sup>                                                                                    | H | No deployed HPR - on sweetcorn. <sup>153</sup>     |
| Sorghum downy mildew <sup>b, 5</sup>    | <i>Peronosclerospora sorghi</i> <sup>1,76</sup>                                                                                  | 1  | L | Local: Soil borne and limited dispersal. <sup>76</sup>                                                                                      | H | Deployed HPRs. <sup>76</sup>                       |
| Southern leaf blight <sup>b</sup>       | <i>Bipolaris maydis</i> <sup>154</sup>                                                                                           | 3  | G | General: Air borne dispersal of spores over long distances. Survival in residues. <sup>154</sup>                                            | H | Deployed HPRs. <sup>154</sup>                      |
| Southern rust <sup>a</sup>              | <i>Puccinia polysora</i> <sup>1,76</sup>                                                                                         | 13 | G | General: Air borne dispersal of spores over long distances. <sup>1,76</sup>                                                                 | H | Deployed HPRs. <sup>1,76</sup>                     |
| (Maize) Spotted stem borer <sup>b</sup> | <i>Chilo partellus</i> <sup>155</sup>                                                                                            | 1  | G | General: Long-range flying insect. <sup>155</sup>                                                                                           | U | No major diversity factor reported. <sup>155</sup> |
| Striga <sup>b,156</sup>                 | <i>Striga</i> spp. ( <i>S. hermontica</i> , <i>asiatica</i> ) <sup>1,156</sup>                                                   | 2  | L | Local: Soil borne and limited dispersal. <sup>156</sup>                                                                                     | U | No major diversity factor reported. <sup>156</sup> |
| Tar spot <sup>b</sup>                   | <i>Phyllachora maydis</i> , <i>Coniothyrium phyllachorae</i> , and <i>Monographella maydis</i> <sup>1,76</sup>                   | 1  | L | Local: Survival on volunteers and in crop residues. Short-distance aerial spore dispersal. <sup>76</sup>                                    | U | No major diversity factor reported. <sup>76</sup>  |
| White spot <sup>b</sup>                 | <i>Pantoea stewartii</i> <sup>1,157</sup>                                                                                        | 2  | L | Local: Transmission by flying vectors and seed borne. Severe, however local outbreaks often associated with crop management. <sup>157</sup> | H | Deployed HPRs. <sup>157</sup>                      |

---

#### Potato

|                                            |                                                                                                     |    |   |                                                                                                            |   |                                                                    |
|--------------------------------------------|-----------------------------------------------------------------------------------------------------|----|---|------------------------------------------------------------------------------------------------------------|---|--------------------------------------------------------------------|
| Aphids <sup>b</sup>                        | <i>Myzus persicae</i> <sup>158</sup>                                                                | 1  | L | Local: Long-range dispersal ability but local outbreaks associated with crop management. <sup>158</sup>    | U | No major diversity factor reported. <sup>158</sup>                 |
| Apical leaf curl <sup>b</sup>              | <i>Potato apical leafcurl virus</i> <sup>159,160</sup>                                              | 1  | F | Focal. Seems limited to Northern India. <sup>159</sup>                                                     | H | Strongly dependent of whitefly seasonal variations. <sup>159</sup> |
| Brown rot <sup>b,161</sup>                 | <i>Ralstonia solanacearum</i> <sup>1,77</sup>                                                       | 8  | F | Focal: Soil borne and transmitted by planting material. <sup>77</sup>                                      | U | No major diversity factor reported. <sup>77</sup>                  |
| Canker and black scurf <sup>b</sup>        | <i>Rhizoctonia solani</i> <sup>1,77</sup>                                                           | 1  | G | General: Soil-borne but very large host range. Spread via contaminated tools or plant parts. <sup>77</sup> | U | No major diversity factor reported. <sup>77</sup>                  |
| Colorado potato beetle <sup>a</sup>        | <i>Leptinotarsa decemlineata</i> <sup>1,162</sup>                                                   | 2  | G | General: Long-range flying insect. <sup>1</sup>                                                            | U | No major diversity factor reported. <sup>1</sup>                   |
| Common scab <sup>a</sup>                   | <i>Streptomyces scabiei</i> , <i>Streptomyces</i> spp. <sup>77,163</sup>                            | 15 | F | Focal: Soil borne. <sup>77</sup>                                                                           | U | No major diversity factor reported. <sup>77</sup>                  |
| Cyst nematode <sup>a</sup>                 | <i>Globodera rostochiensis</i> , <i>G. pallida</i> <sup>77</sup>                                    | 11 | G | General: Soil borne, but transmitted by soil and contaminated tools. <sup>77</sup>                         | U | No major diversity factor reported. <sup>77</sup>                  |
| Early blight <sup>a</sup>                  | <i>Alternaria solani</i> <sup>77</sup>                                                              | 27 | G | General: Air borne dispersal of spores over moderate distances. Survival in residues. <sup>77</sup>        | H | Fungicide protection widespread. <sup>77</sup>                     |
| Early dying/Verticillium wilt <sup>a</sup> | <i>Verticillium albo-atrum</i> , <i>V. dahlia</i> , <i>Pratylenchus penetrans</i> <sup>77,164</sup> | 11 | L | Local: Soil borne and limited dispersal - survival through sclerotia. <sup>77</sup>                        | U | No major diversity factor reported. <sup>77</sup>                  |



|                                 |                                                                         |    |     |                                                                                                                              |   |                                                                                 |
|---------------------------------|-------------------------------------------------------------------------|----|-----|------------------------------------------------------------------------------------------------------------------------------|---|---------------------------------------------------------------------------------|
| Groundnut ringspot <sup>b</sup> | <i>Groundnut ringspot virus</i> <sup>165</sup>                          | 1  | L   | Local: Transmitted by thrips: moderate to short distance dispersal. <sup>165</sup>                                           | U | No major diversity factor reported. <sup>165</sup>                              |
| Late blight <sup>a</sup>        | <i>Phytophthora infestans</i> <sup>77</sup>                             | 63 | G** | General: Air borne dispersal of spores over moderate distances. Survival in residues. <sup>77</sup>                          | H | Large variation in chemical protection (and pathogen diversity) . <sup>77</sup> |
| Leaf miner <sup>b</sup>         | <i>Liriomyza huidobrensis</i> <sup>1,166</sup>                          | 1  | L   | Local: Only local infestations reported. <sup>166</sup>                                                                      | U | No major diversity factor reported. <sup>166</sup>                              |
| Leaf worm <sup>b</sup>          | <i>Spodoptera</i> spp. <sup>167</sup>                                   | 1  | L   | Local: Strong flying dispersal ability, but infestations often spatially patchy and cyclical. <sup>167</sup>                 | U | No major diversity factor reported. <sup>167</sup>                              |
| Potato leafhopper <sup>a</sup>  | <i>Empoasca fabae</i> <sup>1</sup>                                      | 3  | L   | Local: Long-range dispersal ability but local outbreaks associated with crop management. <sup>1</sup>                        | U | No major diversity factor reported. <sup>1</sup>                                |
| Powdery scab <sup>a</sup>       | <i>Spongospora subterranea</i> <sup>1,77</sup>                          | 6  | F   | Focal: Soil borne and transmitted by planting material. <sup>77</sup>                                                        | U | No major diversity factor reported. <sup>77</sup>                               |
| Slugs <sup>b</sup>              | <i>Deroceras reticulatum</i> ,<br><i>Arion hortensis</i> <sup>168</sup> | 1  | L   | Local: Highly polyphagous but short range dispersal ability. <sup>168</sup>                                                  | U | No major diversity factor reported. <sup>168</sup>                              |
| Zebra chip <sup>b</sup>         | <i>Candidatus Liberibacter solanacearum</i> <sup>169</sup>              | 1  | L   | Local: Transmission by flying vectors. Severe, however local outbreaks often associated with crop management. <sup>169</sup> | U | No major diversity factor reported. <sup>169</sup>                              |

---

#### Soybean

|                                     |                                                                                                                                                                 |   |   |                                                                                                             |   |                                                                          |
|-------------------------------------|-----------------------------------------------------------------------------------------------------------------------------------------------------------------|---|---|-------------------------------------------------------------------------------------------------------------|---|--------------------------------------------------------------------------|
| Alternaria leaf spot <sup>b</sup>   | <i>Alternaria</i> spp. <sup>78</sup>                                                                                                                            | 1 | L | Local: Seed borne and survival in crop residues. Short-distance aerial spore dispersal. <sup>78</sup>       | U | No documented heterogeneity (susceptibility, management) . <sup>78</sup> |
| Anthracoise <sup>b</sup>            | <i>Colletotrichum truncatum</i> <sup>1,78</sup>                                                                                                                 | 2 | L | Local: Seed borne and survival in crop residues. Short-distance aerial spore dispersal. <sup>78</sup>       | U | No HPR and limited chemical control (ever) used. <sup>78</sup>           |
| Armyworm <sup>a</sup>               | <i>Spodospora exigua</i> , <i>S. praefica</i> <sup>78</sup>                                                                                                     | 2 | L | Local: Strong flying dispersal ability, but infestations often spatially patchy and cyclical. <sup>78</sup> | U | No HPR no systematic insecticide use. <sup>78</sup>                      |
| Brown spot <sup>b</sup>             | <i>Septoria glycines</i> <sup>170</sup>                                                                                                                         | 2 | L | Local: Seed borne and survival in crop residues. Short-distance aerial spore dispersal. <sup>170</sup>      | U | No HPR and limited chemical control (ever) used. <sup>170</sup>          |
| Cercospora leaf blight <sup>b</sup> | <i>Cercospora kikuchii</i> <sup>1,171</sup>                                                                                                                     | 3 | L | Local: Seed borne and survival in crop residues. Short-distance aerial spore dispersal. <sup>171</sup>      | U | No HPR and limited chemical control (ever) used. <sup>171</sup>          |
| Charcoal rot <sup>b</sup>           | <i>Macrophomina phaseolina</i> <sup>1,172</sup>                                                                                                                 | 2 | L | Local: Soil borne and limited dispersal - survival through sclerotia. <sup>172</sup>                        | U | No HPR. <sup>172</sup>                                                   |
| Cylindrocladium rot <sup>b</sup>    | <i>Calonectria ilicicola</i> (syn. <i>Cylindrocladium parasiticum</i> ); <i>Calonectria morganii</i> (syn. <i>Cylindrocladium scoparium</i> ) <sup>78,173</sup> | 3 | F | Focal: Soil borne. Limited dispersal as microsclerotia in crop debris. <sup>78</sup>                        | U | No HPR - no Fungicide. <sup>78</sup>                                     |

|                                               |                                                                                                                                                 |    |   |                                                                                                           |   |                                                                          |
|-----------------------------------------------|-------------------------------------------------------------------------------------------------------------------------------------------------|----|---|-----------------------------------------------------------------------------------------------------------|---|--------------------------------------------------------------------------|
| Cyst nematode <sup>a</sup>                    | <i>Heterodera glycines</i> <sup>1,78</sup>                                                                                                      | 10 | G | General: Soil borne, but transmitted by soil and contaminated tools. <sup>78</sup>                        | U | Limited use of HPRs. <sup>78</sup>                                       |
| Downy mildew <sup>b</sup>                     | <i>Peronospora manshurica</i> <sup>78</sup>                                                                                                     | 1  | L | Local: Seed borne and limited dispersal. <sup>78</sup>                                                    | H | Wide diversity of races. <sup>78</sup>                                   |
| Frogeye leaf spot <sup>b</sup>                | <i>Cercospora sojina</i> <sup>78</sup>                                                                                                          | 4  | L | Local: Seed borne and survival in crop residues. Short-distance aerial spore dispersal. <sup>78</sup>     | H | Resistances deployed. <sup>78</sup>                                      |
| Fusarium wilt and rot <sup>b</sup>            | <i>Fusarium oxysporum</i> , <i>F. glycines</i> , <i>F. proliferatum</i> <sup>1,78</sup>                                                         | 1  | L | Local: Soil borne and seed borne with limited dispersal. <sup>78</sup>                                    | U | Limited use of HPRs. <sup>78</sup>                                       |
| Phomopsis seed decay <sup>b</sup>             | <i>Diaporthe phaseolorum</i> var. <i>sojae</i> ; <i>Diaporthe longicolla</i> <sup>1,174</sup>                                                   | 1  | F | Focal: Soil borne and transmitted by infected seed. <sup>174</sup>                                        | U | No documented heterogeneity (susceptibility, management). <sup>174</sup> |
| Phyllosticta leaf spot <sup>b</sup>           | <i>Pleospaerulina sojicola</i> (Syn. <i>Phyllosticta sojaecola</i> ) <sup>78,175</sup>                                                          | 1  | G | General: Air borne dispersal of spores over moderate distances. Survival in residues. <sup>78</sup>       | U | No documented heterogeneity (susceptibility, management). <sup>78</sup>  |
| Phytophthora root and stem rot <sup>a</sup>   | <i>Phytophthora sojae</i> <sup>78,176</sup>                                                                                                     | 14 | G | General: Soil borne, but transmitted by soil and contaminated tools. <sup>78</sup>                        | U | Limited use/efficiency of HPRs and chemicals. <sup>78</sup>              |
| Pythium damping-off <sup>a</sup>              | <i>Pythium</i> spp. and <i>Globisporangium</i> spp. <sup>1,78,177</sup>                                                                         | 6  | F | Focal: Soil borne. <sup>78</sup>                                                                          | U | No documented heterogeneity (susceptibility, management). <sup>78</sup>  |
| Reniform nematode <sup>b</sup>                | <i>Rotylenchulus reniformis</i> <sup>1,78</sup>                                                                                                 | 1  | F | Focal: Soil borne. <sup>78</sup>                                                                          | U | No documented heterogeneity (susceptibility, management). <sup>78</sup>  |
| Rhizoctonia root rot, web blight <sup>a</sup> | <i>Rhizoctonia solani</i> <sup>78</sup>                                                                                                         | 9  | L | Local: Soil borne and limited dispersal - survival through sclerotia. <sup>78</sup>                       | U | No documented heterogeneity (susceptibility, management). <sup>78</sup>  |
| Root knot nematode <sup>b</sup>               | <i>Meloidogyne</i> spp. <sup>1,78</sup>                                                                                                         | 2  | L | Local: Soil borne and limited dispersal. <sup>78</sup>                                                    | U | No documented heterogeneity (susceptibility, management). <sup>78</sup>  |
| Soybean mosaic <sup>a</sup>                   | <i>Soybean mosaic virus</i> <sup>78,178</sup>                                                                                                   | 3  | G | General: Transmission by flying insects. <sup>78</sup>                                                    | U | No documented heterogeneity (susceptibility, management). <sup>78</sup>  |
| Soybean rust <sup>a,179</sup>                 | <i>Phakopsora pachyrhizi</i> <sup>78,179</sup>                                                                                                  | 30 | G | General: Air borne dispersal of spores over long distances. <sup>78,179</sup>                             | H | Heterogeneity of HPR and fungicides. <sup>78,179</sup>                   |
| Spider mites <sup>b</sup>                     | <i>Tetranychus</i> spp. <sup>180</sup>                                                                                                          | 1  | L | Local: Short-distance dispersal. Only local outbreaks reported. <sup>180</sup>                            | U | No documented heterogeneity (susceptibility, management). <sup>180</sup> |
| Stem canker <sup>b</sup>                      | <i>Diaporthe phaseolorum</i> var. <i>caulivora</i> ; <i>D. phaseolorum</i> var. <i>meridionalis</i> ( <i>Phomopsis</i> spp.) <sup>181,182</sup> | 1  | L | Local: Soil borne and limited dispersal. <sup>181</sup>                                                   | U | No documented heterogeneity (susceptibility, management). <sup>181</sup> |
| Sudden death <sup>a</sup>                     | <i>Fusarium virguliforme</i> , <i>F. tucumaniae</i> <sup>78,183</sup>                                                                           | 8  | G | General: Air borne dispersal of spores over long distances. Survival in residues. <sup>78</sup>           | U | limited use/efficiency of HPRs and chemicals. <sup>78</sup>              |
| Target spot <sup>b</sup>                      | <i>Corynespora cassiicola</i> <sup>184</sup>                                                                                                    | 2  | L | Local: Seed borne. Short-distance aerial spore dispersal. <sup>184</sup>                                  | H | HPRs deployed. <sup>184</sup>                                            |
| White mould <sup>a</sup>                      | <i>Sclerotinia sclerotiorum</i> <sup>78</sup>                                                                                                   | 15 | G | General: Air borne dispersal over moderate distances. Wide host range. Soil borne survival. <sup>78</sup> | U | Limited use/efficiency of HPRs and chemicals. <sup>78</sup>              |

\* Corresponds to two lists: a: pathogen or pest listed in the survey questionnaire; or b: pathogen or pest named by a respondent to the survey.

† Reference provided if this has been considered an emerging P&P or “key pest”.

‡ Extent: F=Focal, L=Local, G=General.

§ Diversity: H=Heterogeneous, U=Uniform.

|| The extent code for barley yellow dwarf viruses in wheat was set as "global", except in SB&A (South Brazil, Paraguay, Uruguay and Argentina) , where it was set as "focal". This is because the disease loss reported occurs in limited areas in this region.

¶ The diversity code for tritici blotch in wheat was set as "uniform", except in NWE (Northwest Europe), where it was set as "heterogeneous". This reflects the fact that in this region, the disease is managed through regular use of fungicides.

# The diversity code for fall armyworm in maize was set as heterogeneous for all American countries, where pesticides and host plant resistance are used, and set as uniform in all African countries.

☆ Rajasthan and sorghum downy mildews were combined into a single disease.

\*\* The extent code for late blight in potato was set as "global" except in IGP (Indo-Gangetic Plain) and CHINA (mainland China), where it was set as "local", as disease loss reported corresponds to local losses in these regions.

**Supplementary Table 3. Crop loss estimates.** Losses by individual pests and pathogens globally and in food security hotspots.

| Pathogen and pest per crop    | Global             |                | USM&C <sup>1</sup> |           | SB&A         |           | NWE          |           | WANA         |           | SSA          |           | CHINA        |           | IGP          |           | SEA          |           |
|-------------------------------|--------------------|----------------|--------------------|-----------|--------------|-----------|--------------|-----------|--------------|-----------|--------------|-----------|--------------|-----------|--------------|-----------|--------------|-----------|
|                               | estYL <sup>†</sup> | N <sup>‡</sup> | estYL              | N         | estYL        | N         | estYL        | N         | estYL        | N         | estYL        | N         | estYL        | N         | estYL        | N         | estYL        | N         |
| <b>Wheat</b>                  | <b>21.47</b>       | <b>326</b>     | <b>17.91</b>       | <b>25</b> | <b>21.54</b> | <b>20</b> | <b>24.91</b> | <b>62</b> | <b>10.14</b> | <b>22</b> | <b>25.68</b> | <b>13</b> | <b>28.1</b>  | <b>23</b> | <b>16.57</b> | <b>32</b> |              |           |
| Leaf rust                     | 3.25               | 33             | 0.54               | 3         | 1.37         | 2         | 2.50         | 6         | 3.14         | 2         | 2.19         |           | 4.38         | 1         | 4.25         | 5         |              |           |
| FHB-scab                      | 2.85               | 41             | 3.20               | 4         | 4.16         | 6         | 1.80         | 10        |              |           |              |           | 8.75         | 9         | 0            | 1         |              |           |
| Tritici blotch                | 2.44               | 60             | 2.10               | 3         | 2.14         | 2         | 5.51         | 15        | 0.97         | 16        | 5.36         | 1         | 2.10         | 2         |              |           |              |           |
| Stripe rust                   | 2.08               | 44             | 0.82               | 4         | 0.03         | 1         | 5.82         | 8         | 2.80         | 2         | 4.96         | 2         | 2.16         | 3         | 1.44         | 8         |              |           |
| Spot blotch                   | 1.67               | 9              | 1.04               | 1         |              |           | 0            | 1         |              |           |              |           |              |           | 7.29         | 4         |              |           |
| Tan spot                      | 1.64               | 25             | 4.30               | 4         | 6.79         | 4         | 1.91         | 5         |              |           |              |           |              |           |              |           |              |           |
| Aphids                        | 1.30               | 16             | 0.93               |           |              |           | 0.54         | 4         |              |           | 0.85         | 1         | 3.75         | 2         | 1.78         | 4         |              |           |
| Powdery mildew                | 1.07               | 7              |                    |           |              |           | 2.19         | 2         |              |           |              |           | 3.27         | 3         | 0            | 1         |              |           |
| BYD                           | 0.96               | 14             | 0.64               | 1         | 1.17         | 1         | 3.26         | 4         | 2.90         | 1         | 1.72         | 2         | 0.35         | 1         |              |           |              |           |
| Stem rust                     | 0.90               | 21             | 0.10               | 2         | 0.53         | 1         | 0            | 1         | 0.33         | 1         | 8.89         | 4         |              |           | 0.03         | 2         |              |           |
| Nodorum blotch                | 0.90               | 21             | 2.10               | 2         | 0.31         | 1         | 0.11         | 5         |              |           |              |           |              |           |              |           |              |           |
| Crown and Root Rot            | 0.86               | 5              | 1.06               |           |              |           |              |           |              |           |              |           | 2.10         | 1         |              |           |              |           |
| Northern armyworm             | 0.37               | 1              |                    |           |              |           |              |           |              |           |              |           |              |           | 1.73         | 1         |              |           |
| Sharp eye spot                | 0.26               | 1              |                    |           |              |           |              |           |              |           |              |           | 1.25         | 1         |              |           |              |           |
| Rhizoctonia bare patch        | 0.24               | 4              |                    |           |              |           |              |           |              |           |              |           |              |           |              |           |              |           |
| <i>Pratylenchus thornei</i>   | 0.21               | 3              | 0.15               |           |              |           |              |           |              |           |              |           |              |           |              |           |              |           |
| Wheat Soil-borne mosaic       | 0.18               | 2              |                    |           |              |           | 1.28         | 1         |              |           |              |           |              |           |              |           |              |           |
| Aster Yellows                 | 0.09               | 1              | 0.93               | 1         |              |           |              |           |              |           |              |           |              |           |              |           |              |           |
| Wheat Blast                   | 0.07               | 6              |                    |           | 3.52         | 1         |              |           |              |           |              |           |              |           | 0.02         | 2         |              |           |
| Wheat streak mosaic           | 0.05               | 1              |                    |           | 1.51         | 1         |              |           |              |           |              |           |              |           |              |           |              |           |
| <i>Pratylenchus neglectus</i> | 0.03               | 1              |                    |           |              |           |              |           |              |           |              |           |              |           |              |           |              |           |
| Cereal cyst nematode          | 0.01               | 1              |                    |           |              |           |              |           |              |           |              |           |              |           |              |           |              |           |
| <i>Heterodera filipjevi</i>   | 0.01               | 1              |                    |           |              |           |              |           |              |           |              |           |              |           |              |           |              |           |
| Russian wheat aphid           | 0.01               | 1              |                    |           |              |           |              |           |              |           | 0.66         | 1         |              |           |              |           |              |           |
| False armyworm                | 0.01               | 1              |                    |           |              |           |              |           |              |           | 0.76         | 1         |              |           |              |           |              |           |
| Grass leaf miner              | 0.003              | 1              |                    |           |              |           |              |           |              |           | 0.28         | 1         |              |           |              |           |              |           |
| Black Point                   | 0.002              | 1              |                    |           |              |           |              |           |              |           |              |           |              |           | 0.011        | 1         |              |           |
| Fusarium seedling blight      | 0.002              | 1              |                    |           |              |           |              |           |              |           |              |           |              |           | 0.011        | 1         |              |           |
| Wheat spindle streak mosaic   | 0.002              | 1              |                    |           |              |           |              |           |              |           |              |           |              |           |              |           |              |           |
| Sclerotium foot and root rot  | 0.001              | 1              |                    |           |              |           |              |           |              |           |              |           |              |           | 0.004        | 1         |              |           |
| Loose smut                    | 0.0001             | 1              |                    |           |              |           |              |           |              |           |              |           |              |           | 0.0004       | 1         |              |           |
| <b>Rice</b>                   | <b>30.03</b>       | <b>246</b>     |                    |           |              |           |              |           |              |           | <b>31.25</b> | <b>13</b> | <b>32.18</b> | <b>13</b> | <b>40.86</b> | <b>37</b> | <b>24.57</b> | <b>93</b> |
| Sheath blight                 | 6.78               | 18             |                    |           |              |           |              |           |              |           | 6.78         |           | 8.75         | 1         | 5.76         | 5         | 7.06         | 4         |
| Stem borers                   | 5.57               | 20             |                    |           |              |           |              |           |              |           | 5.82         | 1         | 8.75         | 1         | 7.38         | 4         | 2.39         | 8         |
| Blast                         | 4.33               | 52             |                    |           |              |           |              |           |              |           | 4.21         | 3         | 4.38         | 2         | 3.27         | 6         | 5.89         | 11        |
| Brown spot                    | 3.77               | 22             |                    |           |              |           |              |           |              |           | 3.33         | 1         | 3.25         |           | 5.86         | 2         | 2.93         | 13        |
| Bacterial blight              | 2.72               | 36             |                    |           |              |           |              |           |              |           | 4.73         | 3         | 1.05         | 1         | 8.51         | 9         | 1.45         | 14        |
| Leaf folder                   | 1.92               | 1              |                    |           |              |           |              |           |              |           |              |           | 2.10         |           | 2.10         |           | 2.10         | 1         |
| Brown plant hopper            | 1.31               | 17             |                    |           |              |           |              |           |              |           |              |           | 1.05         | 3         | 1.43         | 3         | 1.00         | 6         |
| Bacterial panicle blight      | 0.87               | 7              |                    |           |              |           |              |           |              |           |              |           |              |           | 1.87         | 1         |              |           |
| False smut                    | 0.68               | 5              |                    |           |              |           |              |           |              |           |              |           | 0.88         | 1         | 2.19         | 1         |              |           |
| Sheath rot                    | 0.40               | 12             |                    |           |              |           |              |           |              |           | 0.38         |           | 0.15         | 1         | 1.16         | 2         | 0.15         | 4         |





|                     |        |   |       |   |  |  |
|---------------------|--------|---|-------|---|--|--|
| Cylindrocladium rot | 0.001  | 3 |       |   |  |  |
| Armyworm            | 0.0002 | 2 | 0.001 | 1 |  |  |

\* Food security hotspot: USM&C=US Midwest and Canada; SB&A=South Brazil, Paraguay, Uruguay and Argentina; NWE=Northwest Europe; WANA=West Asia and North Africa; SSA=Sub-Saharan Africa; CHINA=Mainland China; IGP=Indo-Gangetic Plain; SEA=Southeast Asia.

† Crop loss estimate. Shaded columns indicate no reported P&Ps or insufficient responses to estimate a loss.

‡ Number of responses for the pest or pathogen globally or within a given hotspot.

**Supplementary Table 4. Summary of analyses on contingency tables.** Chi-square analyses and interpretations to examine different factors related to global crop losses.

| Variables                                           | Chi-square value | d.f. | P value | Comments on chi-square calculation                             | Interpretations of frequency distributions in contingency table                                                                                                                                                                                                                                                                                 |
|-----------------------------------------------------|------------------|------|---------|----------------------------------------------------------------|-------------------------------------------------------------------------------------------------------------------------------------------------------------------------------------------------------------------------------------------------------------------------------------------------------------------------------------------------|
| <b>Analyses involving all crops globally</b>        |                  |      |         |                                                                |                                                                                                                                                                                                                                                                                                                                                 |
| loss magnitude × crop                               | 57.683           | 12   | < 0.001 | Balanced expected values                                       | Loss magnitudes in<br>- Wheat: evenly distributed across categories, from very low to high<br>- Rice: tended to be low or moderate, seldom high<br>- Maize: generally very low or low<br>- Potato: tended to be high, seldom low or very low<br>- Soybean: tended to be low or very low                                                         |
| loss magnitude × food security hotspot <sup>†</sup> | 165.203          | 24   | <0.001  | Balanced expected values                                       | - NWE, SEA, USM&C: predominantly low yield losses, with infrequent high yield losses<br>- CHINA: Predominantly moderate yield losses with infrequent high or very low yield losses<br>- SB&A, WANA: wide range of yield losses including high yield losses<br>- IGP: low yield losses were infrequent but high yield losses frequently reported |
| food security hotspot <sup>†</sup> × crop           | 596.619          | 32   | <0.001  | Balanced expected values                                       | - SSA: predominantly moderate and high yield losses<br>- Rice-dominated hotspot: SEA<br>- Rice- and wheat- dominated hotspots: CHINA, IGP<br>- Wheat-dominated hotspots: NWE, WANA<br>- Wheat- and soybean- dominated hotspots: SB&A<br>- Maize- and soybean- dominated hotspots: USM&C<br>- Diverse, maize- dominated hotspots: SSA            |
| loss magnitude × loss frequency                     | 66.7             | 9    | <0.001  | Balanced expected values                                       | Losses of very low magnitude are more frequently chronic, or rare; losses of low magnitudes are more frequently chronic or frequent; and losses of moderate or high magnitudes are more frequently rare or infrequent.                                                                                                                          |
| crop × loss frequency                               | 35.4             | 12   | <0.001  | Balanced expected values                                       | More chronic losses in maize and potato; less chronic losses in wheat                                                                                                                                                                                                                                                                           |
| food security hotspot <sup>†</sup> × loss frequency | 67.9             | 24   | <0.001  | Over one-fifth of cells with expected values smaller than five | Valid association re-analysed with a significant ( $P < 0.001$ ) test with combined (Infrequent and Rare) frequency losses: More chronic losses in CHINA and IGP; less chronic losses in SB&A and SEA                                                                                                                                           |
| <b>Analyses involving wheat</b>                     |                  |      |         |                                                                |                                                                                                                                                                                                                                                                                                                                                 |
| climate <sup>†</sup> × loss magnitude               | 50.620           | 18   | <0.001  | Balanced expected values                                       | Loss magnitude associated with climate: moderate and high yield losses more frequent under SUBTR and TROPH                                                                                                                                                                                                                                      |
| yield quartile × loss magnitude                     | 57.897           | 9    | <0.001  | Balanced expected values                                       | Loss magnitude associated with yield levels: Moderate-high yield losses more frequent at very low to low yield levels (YieldQ1-2), and very low to low yield losses more frequent at moderate - high yield levels (YieldQ3-4)                                                                                                                   |
| yield quartile × climate <sup>†</sup>               | 217.946          | 18   | <0.001  | Balanced expected values                                       | Yield levels associated with climates: Highest yield levels associated with OCEAN, lowest yield levels associated with MEDIT, TROPH                                                                                                                                                                                                             |
| food security hotspot <sup>†</sup> × loss magnitude | 98.602           | 21   | <0.001  | Over one-fifth of cells with expected values smaller than five | Valid association re-analysed with a significant ( $P < 0.01$ ) test with combined (Very low – Low) and (Moderate – High) yield losses:<br>- Moderate-High yield losses more frequent: CHINA, SB&A, SSA<br>- Very low-Low yield losses more frequent: USM&C, WANA                                                                               |
| food security hotspot <sup>†</sup> × yield quartile | 412.666          | 21   | <0.001  | Over one-fifth of cells with expected values smaller than five | Valid association re-analysed with a significant ( $P < 0.01$ ) test with combined lowest quartiles (YieldQ1-2) and highest quartiles (YieldQ3-4) yield levels:<br>- Higher yield levels predominant: CHINA, NWE, USM&C<br>- Lower yield levels predominant: SB&A, WANA                                                                         |
| <b>Analyses involving rice</b>                      |                  |      |         |                                                                |                                                                                                                                                                                                                                                                                                                                                 |
| climate <sup>†</sup> × loss magnitude               | 174.709          | 15   | <0.001  | Over one-fifth of cells with expected values smaller than five | Valid association re-analysed with a significant ( $P < 0.01$ ) test with combined (Very low – Low) and (Moderate – High) yield losses:<br>- Moderate-High yield losses more frequent: TROPH<br>- Very low-Low yield losses more frequent: EQUAT, SUBTR                                                                                         |
| yield quartile × loss magnitude                     | 30.266           | 9    | <0.001  | Over one-fifth of cells with expected values smaller than five | Valid association re-analysed with a significant ( $P < 0.01$ ) test with combined (Very low – Low) and (Moderate – High) yield losses:<br>Loss magnitude associated with yield:<br>- High-Moderate yield losses associated with low yields (YieldQ1)<br>- Low-Very low yield losses associated with highest yield (YieldQ4)                    |
| yield quartile × climate <sup>†</sup>               | 29.874           | 15   | 0.012   | Over one-fifth of cells with expected values smaller than five | Valid association re-analysed with a significant ( $P < 0.01$ ) test with combined lowest quartiles (YieldQ1-2) and highest quartiles (YieldQ3-4) yield levels:<br>- Higher yield levels predominant: EQUAT, MEDIT, SUBTR                                                                                                                       |
| food security hotspot <sup>†</sup> × loss magnitude | 32.642           | 15   | 0.005   | Over one-fifth of cells with expected values smaller than five | Valid association re-analysed with a significant ( $P < 0.01$ ) test with combined (Very low – Low) and (Moderate – High) yield losses. Loss magnitude is associated with hotspots:<br>- Moderate-High yield losses dominant in the IGP, SSA<br>- Very low - Low yield losses dominant in SEA<br>- Large range of yield losses in CHINA         |



|                                                     |         |    |        |                                                                |                                                                                                                                                                                                                                                                                                                                                                     |
|-----------------------------------------------------|---------|----|--------|----------------------------------------------------------------|---------------------------------------------------------------------------------------------------------------------------------------------------------------------------------------------------------------------------------------------------------------------------------------------------------------------------------------------------------------------|
| food security hotspot <sup>†</sup> × yield quartile | 203.457 | 15 | <0.001 | Over one-fifth of cells with expected values smaller than five | Valid association re-analysed with a significant ( $P < 0.01$ ) test with combined lowest quartiles (YieldQ1-2) and highest quartiles (YieldQ3-4) yield levels:<br>- Moderate to high yields (YieldQ3-Q4) dominant: CHINA, SB&A, SEA<br>- Very low to low yields (YieldQ1-Q2) dominant: IGP, SSA                                                                    |
| <b>Analyses involving maize</b>                     |         |    |        |                                                                |                                                                                                                                                                                                                                                                                                                                                                     |
| climate <sup>†</sup> × loss magnitude               | 58.708  | 21 | <0.001 | Over one-fifth of cells with expected values smaller than five | Valid association re-analysed with a significant ( $P < 0.01$ ) test with combined (Very low – Low) and (Moderate – High) yield losses:<br>- Moderate-High yield losses more frequent: MONSO                                                                                                                                                                        |
| yield quartile × loss magnitude                     | 45.454  | 9  | <0.001 | Over one-fifth of cells with expected values smaller than five | - Very low-Low yield losses more frequent: CONT, SUBTR<br>Valid association re-analysed with a significant ( $P < 0.01$ ) test with combined (Very low – Low) and (Moderate – High) yield losses:<br>- Moderate-High yield losses more frequent at lowest yield levels (YieldQ1-2)<br>- Very low-Low yield losses more frequent at highest yield levels (YieldQ3-4) |
| yield quartile × climate <sup>†</sup>               | 163.112 | 21 | <0.001 | Over one-fifth of cells with expected values smaller than five | Valid association re-analysed with a significant ( $P < 0.01$ ) test with combined lowest quartiles (YieldQ1-2) and highest quartiles (YieldQ3-4) yield levels:<br>- Higher yield levels predominant: EQUAT, MEDIT, SUBTR<br>- Wide range of yield levels (YieldQ1-2 to YieldQ3-4): MONSO, TROPH                                                                    |
| food security hotspot <sup>†</sup> × loss magnitude | 47.409  | 21 | 0.001  | Over one-fifth of cells with expected values smaller than five | Valid association re-analysed with a significant ( $P < 0.01$ ) test with combined (Very low – Low) and (Moderate – High) yield losses:<br>- Moderate-High yield losses more frequent: IGP, SSA<br>- Very low-Low yield losses more frequent: USM&C                                                                                                                 |
| food security hotspot <sup>†</sup> × yield quartile | 211.964 | 21 | <0.001 | Over one-fifth of cells with expected values smaller than five | Valid association re-analysed with a significant ( $P < 0.01$ ) test with combined lowest quartiles (YieldQ1-2) and highest quartiles (YieldQ3-4) yield levels:<br>- Lower yield levels predominant: IGP, SSA<br>- Higher yield levels predominant: USM&C                                                                                                           |
| <b>Analyses involving potato</b>                    |         |    |        |                                                                |                                                                                                                                                                                                                                                                                                                                                                     |
| climate <sup>†</sup> × loss magnitude               | 48.536  | 18 | <0.001 | Over one-fifth of cells with expected values smaller than five | Valid association re-analysed with a significant ( $P < 0.01$ ) test with combined (Very low – Low) and (Moderate – High) yield losses:<br>- Moderate-High yield losses more frequent: CONT, MONSO, TROPH                                                                                                                                                           |
| yield quartile × loss magnitude                     | 35.795  | 9  | <0.001 | Over one-fifth of cells with expected values smaller than five | Valid association re-analysed with a significant ( $P < 0.01$ ) test with combined (Very low – Low) and (Moderate – High) yield losses:<br>- Moderate-High yield losses more frequent at lowest yield levels (YieldQ1-2)<br>- Very low-Low yield losses more frequent at highest yield levels (YieldQ3-4)                                                           |
| yield quartile × climate <sup>†</sup>               | 159.071 | 18 | <0.001 | Over one-fifth of cells with expected values smaller than five | Valid association re-analysed with a significant ( $P < 0.01$ ) test with combined lowest quartiles (YieldQ1-2) and highest quartiles (YieldQ3-4) yield levels:<br>- Higher yield levels predominant: ARID, MEDIT, OCEAN, TROPH<br>- Lower yield levels predominant: CONT, MONSO                                                                                    |
| food security hotspot <sup>†</sup> × loss magnitude | 37.843  | 21 | 0.013  | Over one-fifth of cells with expected values smaller than five | Valid association re-analysed with a significant ( $P < 0.01$ ) test with combined (Very low – Low) and (Moderate – High) yield losses:<br>- Moderate-High yield losses more frequent: IGP, SSA                                                                                                                                                                     |
| food security hotspot <sup>†</sup> × yield quartile | 144.125 | 21 | <0.001 | Over one-fifth of cells with expected values smaller than five | Valid association re-analysed with a significant ( $P < 0.01$ ) test with combined lowest quartiles (YieldQ1-2) and highest quartiles (YieldQ3-4) yield levels:<br>- Higher yield levels predominant: NWE<br>- Lower yield levels predominant: IGP                                                                                                                  |
| <b>Analyses involving soybean</b>                   |         |    |        |                                                                |                                                                                                                                                                                                                                                                                                                                                                     |
| climate <sup>†</sup> × loss magnitude               | 27.672  | 6  | <0.001 | Balanced expected values                                       | Loss magnitude associated with climate: moderate and high yield losses more frequent under TROPH compared to SUBTR and CONT                                                                                                                                                                                                                                         |
| yield quartile × loss magnitude                     | 44.642  | 9  | <0.001 | Over one-fifth of cells with expected values smaller than five | Valid association re-analysed with a significant ( $P < 0.01$ ) test with combined (Very low – Low) and (Moderate – High) yield losses:<br>- Moderate-High yield losses more frequent at lowest yield level (YieldQ1)<br>- Very low-Low yield losses more frequent at highest yield levels (YieldQ3-4)                                                              |
| yield quartile × climate <sup>†</sup>               | 67.258  | 6  | <0.001 | Balanced expected values                                       | Yield levels associated with climates: Highest yield levels associated with CONT, SUBTR, lowest yield levels associated with TROPH                                                                                                                                                                                                                                  |
| food security hotspot <sup>†</sup> × loss magnitude | 35.559  | 12 | <0.001 | Over one-fifth of cells with expected values smaller than five | Valid association re-analysed with a significant ( $P < 0.01$ ) test with combined (Very low – Low) and (Moderate – High) yield losses:<br>- Moderate-High yield losses more frequent: SSA<br>- Very low-Low yield losses more frequent: USM&C                                                                                                                      |
| food security hotspot <sup>†</sup> × yield quartile | 134.995 | 12 | <0.001 | Over one-fifth of cells with expected values smaller than five | Valid association re-analysed with a significant ( $P < 0.01$ ) test with combined lowest quartiles (YieldQ1-2) and highest quartiles (YieldQ3-4) yield levels:<br>- Higher yield levels predominant: USM&C                                                                                                                                                         |

\* Food security hotspots: USM&C=US Midwest and Canada; SB&A=South Brazil, Paraguay, Uruguay and Argentina; NWE=Northwest Europe; WANA=West Asia and North Africa; SSA=Sub-Saharan Africa; CHINA=Mainland China; IGP=Indo-Gangetic Plain; SEA=Southeast Asia.

† Climate: ARID=Arid; CONT=Humid continental; EQUAT=Equatorial; MEDIT= Mediterranean; MONSO= Monsoon; OCEAN=Oceanic; SUBTR=Subtropics; TROPH=Humid tropics.

**Supplementary Table 5. Interpretations of correspondence analyses. Main statistical results and their interpretation.**

| Axes and variables                                                                                                          | Statistical results                                                                                                                                                                                                                                                                                                                                                                                                          | Interpretation <sup>*</sup> ; [57,59,62]                                                                                                                                       |
|-----------------------------------------------------------------------------------------------------------------------------|------------------------------------------------------------------------------------------------------------------------------------------------------------------------------------------------------------------------------------------------------------------------------------------------------------------------------------------------------------------------------------------------------------------------------|--------------------------------------------------------------------------------------------------------------------------------------------------------------------------------|
| <b>Overall analysis<sup>†</sup>: crop and loss magnitude (supplemental: food security hotspot, and “key pests”)</b>         |                                                                                                                                                                                                                                                                                                                                                                                                                              |                                                                                                                                                                                |
| Inertia accounted for by axes                                                                                               | Dimension 1: 17.09%<br>Dimension 2: 16.15%<br>Accumulated dimensions 1 and 2: 33.24%                                                                                                                                                                                                                                                                                                                                         | An acceptable fraction of the information contained in the [crop x loss magnitude] contingency table is accounted for by the two first dimensions                              |
| Active variable 1: crop                                                                                                     | Contribution to axes:<br>Fairly large accumulated contributions from Maize (18%), Potato (35%), Rice (32%), and Soybean (13%), to the two first dimensions, but very small contribution of Wheat (0.1%).<br>Contribution of axes to class description:<br>Acceptable representations (accumulated squared cosines) of Maize (0.2), Potato (0.5), Rice (0.5), Soybean (0.2), but not of Wheat (less than 0.01) on these axes. | The two first dimensions provide an acceptable representation of crop classes, except Wheat.                                                                                   |
| Active variable 2: loss magnitude                                                                                           | Contribution to axes:<br>Fairly large accumulated contributions of classes to the two first dimensions: 1-Very low (36.18%), 2- Low (9.18%), 3-Moderate (14.27%), and 4-High (40.37%).<br>Contribution of axes to class description:<br>Fairly large representation of classes on these axes: 1-Very low (0.48), 2- Low (0.17), 3-Moderate (0.24), and 4-High (0.56).                                                        | The two first dimensions provide an good representation of loss magnitude classes                                                                                              |
| Supplemental variable 1: food security hotspot <sup>‡</sup>                                                                 | Contribution of axes to class description:<br>Small squared cosines on dimensions 1 and 2, but larger than other dimensions. Squared cosines for SEA (axes 1 and 2) and for USM&C (axis 2) are larger.                                                                                                                                                                                                                       | Some associations may be interpreted as trends only.                                                                                                                           |
| Supplemental variable 2: “key pests”                                                                                        | Contribution of axes to class description:<br>Very small squared cosines (smaller than 0.05). Squared cosines associated with Brown rot (dimension 1) and with Soybean rust (on dimension 2) are higher than for other key pest categories.                                                                                                                                                                                  | Some associations may be interpreted as trends only.                                                                                                                           |
| <b>Wheat<sup>‡</sup>: loss magnitude, climate, and yield quartile (supplemental: food security hotspot and “key pests”)</b> |                                                                                                                                                                                                                                                                                                                                                                                                                              |                                                                                                                                                                                |
| Inertia accounted for by axes                                                                                               | Dimension 1: 14.32%<br>Dimension 2: 13.18%<br>Accumulated dimensions 1 and 2: 27.50%                                                                                                                                                                                                                                                                                                                                         | An acceptable fraction of the information contained in the [loss magnitude x yield x climate] contingency table for Wheat records is accounted for by the two first dimensions |
| Active variable 1: climate <sup>§</sup>                                                                                     | Contribution to axes: Large accumulated contributions from OCEAN (35%) and TROPH (18%), and fairly large contribution of CONT (10%), to the two first dimensions.<br>Contribution of axes to class description: Acceptable representations (accumulated squared cosines) of CONT (0.2), MEDIT (0.1), MONSO (0.1), OCEAN (0.7), and TROPH (0.3) on these axes.                                                                | The two first dimensions account for, and provide an acceptable representation of, most climates for Wheat (except SUBTR).                                                     |
| Active variable 2: loss magnitude                                                                                           | Contribution to axes: Large accumulated contributions from 2-Low (13%) and 4-High (21%), fair contribution of 3-Moderate (6%), to the two first dimensions.<br>Contribution of axes to class description: Acceptable representations (accumulated squared cosines) of 2-Low (0.3), 3-Moderate (0.1), and 4-High (0.4) on these axes.                                                                                         | The two first dimensions account for, and properly represent, Loss magnitude classes, except for 1-Very low losses.                                                            |
| Active variable 3: yield quartiles                                                                                          | Contribution to axes: Large accumulated contributions YieldQ1 (12%), YieldQ3 (24%), and YieldQ4 (35%), and fair contribution of YieldQ2 (11%), to the two first dimensions.<br>Contribution of axes to class description: Good representations (accumulated squared cosines) of YieldQ1 (0.2), YieldQ2 (0.2), YieldQ3 (0.6), and YieldQ4 (0.8) on these axes.                                                                | The two first dimensions account for, and properly represent yield quartiles.                                                                                                  |
| Supplemental variable 1: food security hotspot <sup>‡</sup>                                                                 | Contribution of axes to class description:                                                                                                                                                                                                                                                                                                                                                                                   | NWE and USM&C are well represented by the two first dimensions.                                                                                                                |

NWE (first dimension), and USM&C (dimension 2) are well accounted for. CHINA, IGP (dimension 1) and SB&A, SSA (dimension 2) are represented to some degree.

|                                      |                                                                                                                                                                                                                        |                                                                           |
|--------------------------------------|------------------------------------------------------------------------------------------------------------------------------------------------------------------------------------------------------------------------|---------------------------------------------------------------------------|
| Supplemental variable 2: "key pests" | Contribution of axes to class description:<br><br>Squared cosine values for stem rust, stripe rust, wheat blast are small on all first five dimensions. Squared cosine value for wheat blast is higher on dimension 2. | Only wheat blast is reasonably accounted for by the two first directions. |
|--------------------------------------|------------------------------------------------------------------------------------------------------------------------------------------------------------------------------------------------------------------------|---------------------------------------------------------------------------|

---

**Rice<sup>2</sup>: loss magnitude, climate, and yield quartile (supplemental: food security hotspot and "key pests")**

|                                                             |                                                                                                                                                                                                                                                                                                                                         |                                                                                                                                                                               |
|-------------------------------------------------------------|-----------------------------------------------------------------------------------------------------------------------------------------------------------------------------------------------------------------------------------------------------------------------------------------------------------------------------------------|-------------------------------------------------------------------------------------------------------------------------------------------------------------------------------|
| Inertia accounted for by axes                               | Dimension 1: 16.64%<br><br>Dimension 2: 13.59%<br><br>Accumulated dimensions 1 and 2: 30.23%                                                                                                                                                                                                                                            | An acceptable fraction of the information contained in the [loss magnitude x yield x climate] contingency table for Rice records is accounted for by the two first dimensions |
| Active variable 1: climate <sup>§</sup>                     | Contribution to axes: Large contributions from MEDIT and SUBTR to dimension 1, and from TROPH to dimension 2.<br><br>Contribution of axes to class description: Acceptable (accumulated) representations (squared cosines) of CONT, MEDIT, MONSO, OCEAN and TROPH on these axes.                                                        | The two first dimensions account for, and provide an acceptable representation of, most climates for Rice (except ARID).                                                      |
| Active variable 2: loss magnitude                           | Contribution to axes: All levels of loss magnitude have some contribution to the two first dimensions. However, only 4-High has a large contribution.<br><br>Contribution of axes to class description: Acceptable (accumulated) representations (squared cosines) 2-Low, 3-Moderate, and 4-High, but not of 1-Very low, on these axes. | The two first dimensions account for, and properly represent, loss magnitude classes, except for 1-Very low losses.                                                           |
| Active variable 3: yield quartile                           | Contribution to axes: Large contributions of YieldQ1, YieldQ3, and YieldQ4 to the two first dimensions.<br><br>Contribution of axes to class description: Good representations (squared cosines) of all four yield quartiles on these axes.                                                                                             | The two first dimensions account for, and properly represent yield quartiles.                                                                                                 |
| Supplemental variable 1: food security hotspot <sup>§</sup> | Contribution of axes to class description:<br><br>CHINA, IGP are represented on dimension 1, and SEA on dimension 2. SSA is represented on both dimensions.                                                                                                                                                                             | CHINA, IGP, SEA, and (especially) SSA, are well represented by the two first dimensions.                                                                                      |
| Supplemental variable 2: "key pests"                        | Contribution of axes to class description:<br><br>Squared cosine values for Bacterial panicle blight and False smut are small on all first five dimensions.                                                                                                                                                                             | Key diseases and pests are not well accounted for by the two first directions. Direction 1 provides some description of Bacterial panicle blight.                             |

---

**Maize<sup>2,§</sup>: loss magnitude, climate, and yield quartile (supplemental: food security hotspot and "key pests")**

|                                                             |                                                                                                                                                                                                                                                                                                          |                                                                                                                                                                                |
|-------------------------------------------------------------|----------------------------------------------------------------------------------------------------------------------------------------------------------------------------------------------------------------------------------------------------------------------------------------------------------|--------------------------------------------------------------------------------------------------------------------------------------------------------------------------------|
| Inertia accounted for by axes                               | Dimension 1: 17.30%<br><br>Dimension 2: 13.29%<br><br>Accumulated dimensions 1 and 2: 30.59%                                                                                                                                                                                                             | An acceptable fraction of the information contained in the [loss magnitude x yield x climate] contingency table for Maize records is accounted for by the two first dimensions |
| Active variable 1: climate <sup>§</sup>                     | Contribution to axes: Fairly large contributions from CONT, MONSO, TROPH (dimension 1), CONT, MONSO, SUBTR, TROPH (dimension 2) to the two first dimensions.<br><br>Contribution of axes to class description: Acceptable representations (squared cosines) of climates on these axes, except for EQUAT. | The two first dimensions account for, and provide an acceptable representation of, most climates for Maize (except EQUAT).                                                     |
| Active variable 2: loss magnitude                           | Contribution to axes: Large contributions from 1-Very low and 4-Very high to dimension 1; large contributions of 2-Low and 3-Moderate to dimension 2.<br><br>Contribution of axes to class description: Good representations (squared cosines) of all 4 classes on these axes.                           | The two first dimensions account for, and properly represent, loss magnitude classes.                                                                                          |
| Active variable 3: yield quartiles                          | Contribution to axes: Fairly large accumulated contributions of each quartile to the two first dimensions.<br><br>Contribution of axes to class description: Good representations (squared cosines) of all quartiles on these axes.                                                                      | The two first dimensions account for, and properly represent yield quartiles.                                                                                                  |
| Supplemental variable 1: food security hotspot <sup>§</sup> | Contribution of axes to class description:<br><br>Fair representation of CHINA (dim. 1), IGP (dim. 1 and 2), NWE (dim. 1 and 2), SSA (dim. 1 and 2) and USM&C (dim. 1 and 2). Poor representation of SB&A, SEA.                                                                                          | Hotspots are well represented except SB&A and SEA.                                                                                                                             |

|                                      |                                                                                                                                                                                                                                            |                                                                                           |
|--------------------------------------|--------------------------------------------------------------------------------------------------------------------------------------------------------------------------------------------------------------------------------------------|-------------------------------------------------------------------------------------------|
| Supplemental variable 2: "key pests" | Contribution of axes to class description:<br><br>Squared cosine values for Maize key pests and diseases are small on all first five dimensions. Squared cosine values on dimension 1 are however higher compared to all other dimensions. | Dimension 1 provides some accounting of Striga, Maize lethal necrosis, and fall armyworm. |
|--------------------------------------|--------------------------------------------------------------------------------------------------------------------------------------------------------------------------------------------------------------------------------------------|-------------------------------------------------------------------------------------------|

---

**Potato<sup>†§</sup>: loss magnitude, climate, and yield quartile (supplemental: food security hotspot and "key pests")**

|                                                             |                                                                                                                                                                                                                                                                                                      |                                                                                                                                                                                 |
|-------------------------------------------------------------|------------------------------------------------------------------------------------------------------------------------------------------------------------------------------------------------------------------------------------------------------------------------------------------------------|---------------------------------------------------------------------------------------------------------------------------------------------------------------------------------|
| Inertia accounted for by axes                               | Dimension 1: 16.60%<br><br>Dimension 2: 14.81%<br><br>Accumulated dimensions 1 and 2: 31.41%                                                                                                                                                                                                         | An acceptable fraction of the information contained in the [loss magnitude x yield x climate] contingency table for Potato records is accounted for by the two first dimensions |
| Active variable 1: climate <sup>‡</sup>                     | Contribution to axes: Fairly large contributions from MONSO, OCEAN (dimension 1), CONT, OCEAN, TROPH (dimension 2) to the two first dimensions.<br><br>Contribution of axes to class description: Acceptable representations (squared cosines) of Climates on these axes, except for ARID and SUBTR. | The two first dimensions account for, and provide an acceptable representation of, most climates for Potato (except ARID and SUBTR).                                            |
| Active variable 2: loss magnitude                           | Contribution to axes: fairly large contributions from 1-Very low and 4-Very high to dimension 1.<br><br>Contribution of axes to class description: Good representations (squared cosines) of 1-Very low, 2-Low, and 4-High on direction 1 only.                                                      | Only direction 1 accounts for, and properly represent, loss magnitude classes, except 3-Moderate.                                                                               |
| Active variable 3: yield quartiles                          | Contribution to axes: Fairly large accumulated contributions of each quartile to the two first dimensions.<br><br>Contribution of axes to class description: Good representations (squared cosines) of all quartiles on these axes.                                                                  | The two first dimensions account for, and properly represent yield quartiles.                                                                                                   |
| Supplemental variable 1: food security hotspot <sup>‡</sup> | Contribution of axes to class description:<br><br>Fair representation of IGP (dim. 1), NWE (dim. 1 and 2), and SSA (dim. 2). Poor representation of CHINA, SB&A, USM&C, WANA.                                                                                                                        | Only some hotspots well represented: IGP, NWE, SSA.                                                                                                                             |
| Supplemental variable 2: "key pests"                        | Contribution of axes to class description:<br><br>Fair representation (squared cosine) of brown rot on dimension 2.                                                                                                                                                                                  | Dimension 2 provides some accounting of Brown rot.                                                                                                                              |

---

**Soybean<sup>†§</sup>: loss magnitude, climate, and yield quartile (supplemental: food security hotspot and "key pests")**

|                                                             |                                                                                                                                                                                                                                                                                                              |                                                                                                                                                                                  |
|-------------------------------------------------------------|--------------------------------------------------------------------------------------------------------------------------------------------------------------------------------------------------------------------------------------------------------------------------------------------------------------|----------------------------------------------------------------------------------------------------------------------------------------------------------------------------------|
| Inertia accounted for by axes                               | Dimension 1: 27.11%<br><br>Dimension 2: 15.72%<br><br>Accumulated dimensions 1 and 2: 42.83%                                                                                                                                                                                                                 | An acceptable fraction of the information contained in the [loss magnitude x yield x climate] contingency table for Soybean records is accounted for by the two first dimensions |
| Active variable 1: climate <sup>‡</sup>                     | Contribution to axes: Fairly large contributions from CONT and TROPH to dimension 1.<br><br>Contribution of axes to class description: Good representations (squared cosines) of Climates, especially on dimension 1.                                                                                        | The two first dimensions account for, and provide an acceptable representation of, most climates for Potato. (Note: only 3 climates reported).                                   |
| Active variable 2: loss magnitude                           | Contribution to axes: fairly large contributions from 1-Very low, 3-Moderate, and 4-Very high to dimension 1; and from 1-Very low and 4-Very high to dimension 2.<br><br>Contribution of axes to class description: fair accumulated representations (squared cosines) of all classes along both directions. | Directions 1 and 2 account for, and properly represent classes of loss magnitude.                                                                                                |
| Active variable 3: yield quartiles                          | Contribution to axes: Fairly large accumulated contributions of each quartile to the two first dimensions.<br><br>Contribution of axes to class description: Good representations (squared cosines) of all quartiles on these axes.                                                                          | The two first dimensions account for, and properly represent yield quartiles.                                                                                                    |
| Supplemental variable 1: food security hotspot <sup>‡</sup> | Contribution of axes to class description:<br><br>Fair representation of SSA (dim. 1 and 2) and USM&C (dim. 1). CHINA and SB&A poorly represented on these axes.                                                                                                                                             | Only some hotspots well represented: SSA and USM&C. CHINA and SB&A poorly represented.                                                                                           |
| Supplemental variable 2: "key pests"                        | Contribution of axes to class description:<br><br>Fair representation (squared cosine) of soybean rust on both dimensions.                                                                                                                                                                                   | Dimensions 1 and 2 properly represent soybean rust.                                                                                                                              |

---

\* Interpretation of correspondence analyses is based on a number of criteria, which are summarised here. First is the amount of inertia accounted by axes. A large accumulated inertia accounted for by the considered axes implies a proportionally large representation of the information contained in the original contingency table(s). In

the following analyses, the two first axes were deemed to represent a satisfactory fraction of this information. Second is the inertia accounted by each of the classes (categories) representing the modalities of a given variable. The larger the inertia of an individual class, the larger its importance, which increases with the squared distance of this class from the origin of factorial axes. A quantitative measure is provided by the (relative, on a 0-100% scale) contribution of each classes of a given variable in accounting for the inertia of each axis, and, reciprocally, by the (relative, on a 0-1 scale) representation of each class by a given axis (labelled Squared-Cosine in outputs). Third is the proximity between two classes of the variables considered. Proximity of two classes on the graph suggests association. However, the significance of such association is proportional to the (squared) distance to the origin of axes. Two graphically proximate different classes, which are at a large distance from the origin of axes may indicate very strong, significant associations; however, proximity of two classes on, or in close proximity to the origin of the factorial axes has little or no significance. These interpretations pertaining to associations can be specifically tested with chi-square tests.

† Overall correspondence analysis: Active variables are crop (five classes: Wheat, Rice, Maize, Potato, Soybean) and loss magnitude (four classes: 1-Very low, 2-Low, 3-Moderate, and 4-High); supplementary variables are food security hotspot and emerging pathogens and pests, P&P or “key pests”.

‡ Crop specific analysis: For each crop, active variables are loss magnitude, climate, and yield quartiles; supplementary variables are food security hotspot and emerging pathogens and pests, P&P or “key pests”.

§ Some climate categories were represented only by a few individuals (less than 4% of the population) in wheat, maize, potato, and soybean. Individuals from these climate categories were removed prior to analyses in order to provide robust results: 4 individuals from EQUAT were removed for wheat; 1 individual removed from EQUAT for maize; 4 individuals from EQUAT were removed for potato; 8 individuals from ARID (1), EQUAT (2), MEDIT (1), and MONSO (4) for soybean.

|| Food security hotspots: USM&C=US Midwest and Canada; SB&A=South Brazil, Paraguay, Uruguay and Argentina; NWE=Northwest Europe; WANA=West Asia and North Africa; SSA=Sub-Saharan Africa; CHINA=Mainland China; IGP=Indo-Gangetic Plain; SEA=Southeast Asia.

¶ Climate: ARID=Arid; CONT=Humid continental; EQUAT=Equatorial; MEDIT= Mediterranean; MONSO= Monsoon; OCEAN=Oceanic; SUBTR=Subtropics; TROPH=Humid tropics.

**Supplementary Table 6. Outputs of correspondence analyses.**

| Overall correspondence analysis               |            |          |          |         |         |         |
|-----------------------------------------------|------------|----------|----------|---------|---------|---------|
| Active variables: Crop and loss magnitude     |            |          |          |         |         |         |
| Coordinates                                   |            | Dim 1    | Dim 2    | Dim 3   | Dim 4   | Dim 5   |
|                                               | Maize      | -0.5328  | 1.0967   | -0.1603 | 1.8748  | -0.1518 |
|                                               | Potato     | 1.6612   | -0.2005  | 0.483   | 0.5419  | 0.4574  |
|                                               | Rice       | -0.6885  | -0.9965  | 0.4646  | 0.2463  | 0.44    |
|                                               | Soybean    | -0.2724  | 1.0665   | 1.0881  | -1.5904 | 1.0304  |
|                                               | Wheat      | 0.0648   | -0.0265  | -0.9281 | -0.6257 | -0.8789 |
|                                               | 1-Very low | -0.7211  | 1.4728   | -0.6487 | 0       | 0.6143  |
|                                               | 2-Low      | -0.4869  | -0.2344  | 0.7934  | 0       | -0.7513 |
|                                               | 3-Moderate | 0.154    | -0.6746  | -0.7671 | 0       | 0.7264  |
|                                               | 4-High     | 1.758    | 0.6495   | 0.4656  | 0       | -0.4409 |
| Contributions to axes                         |            | Dim 1    | Dim 2    | Dim 3   | Dim 4   | Dim 5   |
|                                               | Maize      | 3.312    | 14.8492  | 0.3399  | 49.0444 | 0.3399  |
|                                               | Potato     | 35.9285  | 0.5539   | 3.4453  | 4.5734  | 3.4453  |
|                                               | Rice       | 9.8598   | 21.8568  | 5.092   | 1.5091  | 5.092   |
|                                               | Soybean    | 0.7839   | 12.7198  | 14.1925 | 31.9686 | 14.1925 |
|                                               | Wheat      | 0.1158   | 0.0204   | 26.9303 | 12.9045 | 26.9303 |
|                                               | 1-Very low | 6.682    | 29.4996  | 6.1339  | 0       | 6.1339  |
|                                               | 2-Low      | 7.3742   | 1.8084   | 22.2128 | 0       | 22.2128 |
|                                               | 3-Moderate | 0.6697   | 13.5974  | 18.8472 | 0       | 18.8472 |
|                                               | 4-High     | 35.2741  | 5.0947   | 2.8061  | 0       | 2.8061  |
| Squared cosines                               |            | Dim 1    | Dim 2    | Dim 3   | Dim 4   | Dim 5   |
|                                               | Maize      | 0.046    | 0.195    | 0.0042  | 0.57    | 0.0037  |
|                                               | Potato     | 0.509    | 0.0074   | 0.043   | 0.0542  | 0.0386  |
|                                               | Rice       | 0.157    | 0.3288   | 0.0715  | 0.0201  | 0.0641  |
|                                               | Soybean    | 0.0107   | 0.1646   | 0.1713  | 0.3659  | 0.1536  |
|                                               | Wheat      | 0.0021   | 3.00E-04 | 0.4236  | 0.1925  | 0.3799  |
|                                               | 1-Very low | 0.0944   | 0.3939   | 0.0764  | 0       | 0.0685  |
|                                               | 2-Low      | 0.1405   | 0.0325   | 0.373   | 0       | 0.3345  |
|                                               | 3-Moderate | 0.0121   | 0.232    | 0.3001  | 0       | 0.2691  |
|                                               | 4-High     | 0.4886   | 0.0667   | 0.0343  | 0       | 0.0307  |
| Supplementary variable: Food security hotspot |            |          |          |         |         |         |
| Coordinates                                   |            | Dim 1    | Dim 2    | Dim 3   | Dim 4   | Dim 5   |
|                                               | CHINA      | -0.2459  | -0.4126  | -0.4017 | -0.0099 | -0.2086 |
|                                               | IGP        | 0.1579   | -0.3463  | -0.0046 | 0.2395  | -0.1486 |
|                                               | NWE        | 0.0981   | -0.0037  | -0.7672 | -0.2271 | -0.4695 |
|                                               | SB&A       | 0.1503   | 0.5544   | 0.2301  | -0.6357 | 0.1142  |
|                                               | SEA        | -0.7576  | -0.8814  | 0.5401  | 0.2441  | 0.3602  |
|                                               | SSA        | 0.4719   | 0.3206   | 0.1831  | 0.4284  | 0.0808  |
|                                               | USM&C      | -0.4687  | 0.8195   | 0.2231  | -0.0424 | -0.0699 |
|                                               | WANA       | 0.356    | 0.4222   | -0.7607 | -0.3143 | -0.302  |
| Squared cosines                               |            | Dim 1    | Dim 2    | Dim 3   | Dim 4   | Dim 5   |
|                                               | CHINA      | 0.0029   | 0.0081   | 0.0077  | 0       | 0.0021  |
|                                               | IGP        | 0.0027   | 0.0132   | 0       | 0.0063  | 0.0024  |
|                                               | NWE        | 9.00E-04 | 0        | 0.0532  | 0.0047  | 0.0199  |

|       |        |        |        |          |          |
|-------|--------|--------|--------|----------|----------|
| SB&A  | 0.0014 | 0.0192 | 0.0033 | 0.0252   | 8.00E-04 |
| SEA   | 0.061  | 0.0826 | 0.031  | 0.0063   | 0.0138   |
| SSA   | 0.0204 | 0.0094 | 0.0031 | 0.0168   | 6.00E-04 |
| USM&C | 0.0223 | 0.0681 | 0.005  | 2.00E-04 | 5.00E-04 |
| WANA  | 0.004  | 0.0056 | 0.0181 | 0.0031   | 0.0029   |

---

**Supplementary variable: Emerging pathogens and pests, P&P or "key pests"**

| Coordinates              | Dim 1   | Dim 2   | Dim 3   | Dim 4   | Dim 5   |
|--------------------------|---------|---------|---------|---------|---------|
| Bacterial panicle blight | -0.485  | -1.1443 | 0.5144  | 0.2463  | 0.3874  |
| Brown rot                | 2.4566  | 0.1531  | 0.7924  | 0.5419  | 0.1307  |
| fall armyworm            | 0.5774  | 1.1545  | -0.1001 | 1.8748  | -0.2153 |
| False smut               | -0.6613 | -1.3228 | 0.3051  | 0.2463  | 0.6084  |
| maize lethal necrosis    | 0.3539  | 0.9593  | -0.295  | 1.8748  | -0.0095 |
| soybean rust             | 0.3019  | 1.1223  | 1.1183  | -1.5904 | 0.9986  |
| stem rust                | 0.1273  | 0.2199  | -1.0711 | -0.6257 | -0.728  |
| striga                   | 0.3539  | 0.9593  | -0.295  | 1.8748  | -0.0095 |
| stripe rust              | 0.0386  | -0.2404 | -0.6987 | -0.6257 | -1.1212 |
| wheat blast              | 1.0771  | 0.1607  | -0.8284 | -0.6257 | -0.9843 |

  

| Squared cosines          | Dim 1    | Dim 2    | Dim 3    | Dim 4    | Dim 5    |
|--------------------------|----------|----------|----------|----------|----------|
| Bacterial panicle blight | 0.0017   | 0.0093   | 0.0019   | 4.00E-04 | 0.0011   |
| Brown rot                | 0.0492   | 2.00E-04 | 0.0051   | 0.0024   | 1.00E-04 |
| fall armyworm            | 0.001    | 0.0041   | 0        | 0.0107   | 1.00E-04 |
| False smut               | 0.0022   | 0.0089   | 5.00E-04 | 3.00E-04 | 0.0019   |
| maize lethal necrosis    | 3.00E-04 | 0.0019   | 2.00E-04 | 0.0071   | 0        |
| soybean rust             | 0.0029   | 0.0394   | 0.0391   | 0.0791   | 0.0312   |
| stem rust                | 4.00E-04 | 0.001    | 0.0249   | 0.0085   | 0.0115   |
| striga                   | 3.00E-04 | 0.0019   | 2.00E-04 | 0.0071   | 0        |
| stripe rust              | 1.00E-04 | 0.0027   | 0.0227   | 0.0182   | 0.0585   |
| wheat blast              | 0.0071   | 2.00E-04 | 0.0042   | 0.0024   | 0.0059   |

---

**Wheat correspondence analysis**

**Active variables: Climate<sup>†</sup>, loss magnitude and yield quartile**

| Coordinates | Dim 1   | Dim 2   | Dim 3   | Dim 4   | Dim 5   |
|-------------|---------|---------|---------|---------|---------|
| ARID        | 0.3566  | 0.1679  | 0.9815  | 1.9853  | 0.7586  |
| CONT        | 0.5873  | -0.7106 | -0.4641 | -0.0539 | -1.1318 |
| MEDIT       | 0.5121  | 0.3836  | 1.3365  | -1.2024 | 0.0864  |
| MONSO       | 0.8479  | -0.5659 | -0.9761 | -0.7462 | 2.0027  |
| OCEAN       | -1.7152 | -0.5252 | 0.1181  | 0.1408  | 0.1941  |
| SUBTR       | 0.1995  | 0.3072  | -0.6345 | 0.2913  | -0.3907 |
| TROPH       | -0.2282 | 1.9595  | -0.6486 | -0.0907 | 0.2871  |
| 1-Very low  | 0.4238  | -0.2764 | 0.7128  | 1.2443  | -0.9023 |
| 2-Low       | 0.2778  | -0.7311 | -0.1677 | -0.0752 | 0.5253  |
| 3-Moderate  | -0.4997 | 0.2194  | 0.0463  | -0.7192 | -0.3988 |
| 4-High      | 0.1726  | 1.5634  | -0.569  | 0.6743  | 0.8753  |
| YieldQ1     | 0.3459  | 1.0948  | 1.6057  | -0.1687 | -0.0011 |
| YieldQ2     | 0.4926  | 0.625   | -1.0343 | -0.0471 | -0.3946 |
| YieldQ3     | 0.6567  | -0.8953 | 0.1823  | -0.045  | 0.2613  |
| YieldQ4     | -1.5131 | -0.1751 | -0.0698 | 0.2004  | 0.0889  |

  

| Contributions to axes | Dim 1 | Dim 2 | Dim 3 | Dim 4 | Dim 5 |
|-----------------------|-------|-------|-------|-------|-------|
|-----------------------|-------|-------|-------|-------|-------|



|                 |            |         |         |         |          |         |
|-----------------|------------|---------|---------|---------|----------|---------|
|                 | ARID       | 0.7125  | 0.1717  | 6.4271  | 31.4382  | 4.9752  |
|                 | CONT       | 3.9279  | 6.2492  | 2.9205  | 0.0471   | 22.5049 |
|                 | MEDIT      | 2.5593  | 1.5607  | 20.7563 | 20.0894  | 0.1124  |
|                 | MONSO      | 3.2488  | 1.5726  | 5.1257  | 3.5816   | 27.9646 |
|                 | OCEAN      | 32.4335 | 3.3048  | 0.1831  | 0.3113   | 0.6409  |
|                 | SUBTR      | 0.4676  | 1.2046  | 5.6308  | 1.4191   | 2.7666  |
|                 | TROPH      | 0.2166  | 17.3464 | 2.0822  | 0.0487   | 0.5288  |
|                 | 1-Very low | 1.6877  | 0.7805  | 5.6852  | 20.7175  | 11.8059 |
|                 | 2-Low      | 1.5066  | 11.3401 | 0.6534  | 0.1571   | 8.3126  |
|                 | 3-Moderate | 5.3697  | 1.1252  | 0.0549  | 15.8362  | 5.2778  |
|                 | 4-High     | 0.2314  | 20.6453 | 2.9963  | 5.031    | 9.1869  |
|                 | YieldQ1    | 1.0381  | 11.3004 | 26.6309 | 0.3516   | 0       |
|                 | YieldQ2    | 3.8155  | 6.6753  | 20.0289 | 0.0496   | 3.7772  |
|                 | YieldQ3    | 8.0278  | 16.2175 | 0.7366  | 0.0537   | 1.9608  |
|                 | YieldQ4    | 34.7573 | 0.5058  | 0.0881  | 0.8679   | 0.1853  |
| Squared cosines |            | Dim 1   | Dim 2   | Dim 3   | Dim 4    | Dim 5   |
|                 | ARID       | 0.0135  | 0.003   | 0.1026  | 0.4199   | 0.0613  |
|                 | CONT       | 0.0839  | 0.1228  | 0.0524  | 7.00E-04 | 0.3116  |
|                 | MEDIT      | 0.0528  | 0.0296  | 0.3599  | 0.2913   | 0.0015  |
|                 | MONSO      | 0.0605  | 0.027   | 0.0802  | 0.0469   | 0.3376  |
|                 | OCEAN      | 0.6876  | 0.0645  | 0.0033  | 0.0046   | 0.0088  |
|                 | SUBTR      | 0.0101  | 0.0239  | 0.1018  | 0.0215   | 0.0386  |
|                 | TROPH      | 0.004   | 0.2954  | 0.0324  | 6.00E-04 | 0.0063  |
|                 | 1-Very low | 0.0346  | 0.0147  | 0.0978  | 0.2982   | 0.1568  |
|                 | 2-Low      | 0.039   | 0.2698  | 0.0142  | 0.0029   | 0.1393  |
|                 | 3-Moderate | 0.1464  | 0.0282  | 0.0013  | 0.3032   | 0.0932  |
|                 | 4-High     | 0.0046  | 0.3767  | 0.0499  | 0.0701   | 0.1181  |
|                 | YieldQ1    | 0.021   | 0.21    | 0.4516  | 0.005    | 0       |
|                 | YieldQ2    | 0.0898  | 0.1446  | 0.3961  | 8.00E-04 | 0.0576  |
|                 | YieldQ3    | 0.2028  | 0.377   | 0.0156  | 0.001    | 0.0321  |
|                 | YieldQ4    | 0.808   | 0.0108  | 0.0017  | 0.0142   | 0.0028  |

---

**Supplementary variable: Food security hotspot\***

|                 |       |          |         |         |          |         |
|-----------------|-------|----------|---------|---------|----------|---------|
| Coordinates     |       | Dim 1    | Dim 2   | Dim 3   | Dim 4    | Dim 5   |
|                 | CHINA | -0.8391  | -0.1314 | -0.249  | 0.1909   | -0.4264 |
|                 | IGP   | 0.7734   | -0.403  | -0.667  | -0.1575  | 1.6387  |
|                 | NWE   | -1.4547  | -0.5451 | 0.1341  | 0.0537   | 0.0908  |
|                 | SB&A  | 0.4095   | 1.1423  | -1.3584 | 0.387    | -0.3017 |
|                 | SSA   | 0.0404   | 1.115   | -0.647  | 0.3888   | 0.6097  |
|                 | USM&C | 0.8125   | -1.288  | -0.1548 | 0.0243   | -0.5533 |
| Squared cosines |       | Dim 1    | Dim 2   | Dim 3   | Dim 4    | Dim 5   |
|                 | CHINA | 0.0542   | 0.0013  | 0.0048  | 0.0028   | 0.014   |
|                 | IGP   | 0.057    | 0.0155  | 0.0424  | 0.0024   | 0.2557  |
|                 | NWE   | 0.5046   | 0.0709  | 0.0043  | 7.00E-04 | 0.002   |
|                 | SB&A  | 0.0111   | 0.0864  | 0.1222  | 0.0099   | 0.006   |
|                 | SSA   | 1.00E-04 | 0.0523  | 0.0176  | 0.0064   | 0.0156  |
|                 | USM&C | 0.0556   | 0.1396  | 0.002   | 0        | 0.0258  |

---

**Supplementary variable: Emerging pathogens and pests, P&P or "key pests"**

|             |  |       |       |       |       |       |
|-------------|--|-------|-------|-------|-------|-------|
| Coordinates |  | Dim 1 | Dim 2 | Dim 3 | Dim 4 | Dim 5 |
|-------------|--|-------|-------|-------|-------|-------|

|                 |             |          |         |         |          |         |
|-----------------|-------------|----------|---------|---------|----------|---------|
|                 | stem rust   | 0.423    | 0.3644  | -0.4425 | -0.0404  | -0.2431 |
|                 | stripe rust | -0.0264  | -0.2645 | -0.0958 | -0.2254  | 0.4842  |
|                 | wheat blast | 0.2728   | 1.755   | -1.4333 | -0.0626  | 0.4183  |
| Squared cosines |             | Dim 1    | Dim 2   | Dim 3   | Dim 4    | Dim 5   |
|                 | stem rust   | 0.0125   | 0.0093  | 0.0137  | 1.00E-04 | 0.0041  |
|                 | stripe rust | 1.00E-04 | 0.0111  | 0.0015  | 0.008    | 0.0371  |
|                 | wheat blast | 0.0012   | 0.0486  | 0.0324  | 1.00E-04 | 0.0028  |

---

### Rice correspondence analysis

---

#### Active variables: Climate<sup>†</sup>, loss magnitude and yield quartile

|                       |            |          |         |         |          |         |
|-----------------------|------------|----------|---------|---------|----------|---------|
| Coordinates           |            | Dim 1    | Dim 2   | Dim 3   | Dim 4    | Dim 5   |
|                       | ARID       | -1.2063  | 1.4038  | -1.7456 | 1.77     | 2.5375  |
|                       | EQUAT      | -0.5564  | -0.8836 | 1.7844  | 0.6829   | 0.6087  |
|                       | MEDIT      | 1.9792   | 0.6461  | 0.1846  | 2.1167   | -0.0408 |
|                       | MONSO      | -0.2145  | -0.3997 | -0.4168 | -0.1441  | -0.3763 |
|                       | SUBTR      | 1.646    | 0.6345  | 0.1985  | -0.6291  | 0.421   |
|                       | TROPH      | -0.9667  | 1.8233  | 0.9577  | -0.9603  | -0.0668 |
|                       | 1-Very low | 1.1384   | 0.0988  | -0.2277 | -0.1725  | -1.3904 |
|                       | 2-Low      | 0.0017   | -0.4025 | 0.3421  | 0.6177   | 0.0798  |
|                       | 3-Moderate | -0.1353  | 0.1686  | -0.4105 | -0.7795  | 0.6783  |
|                       | 4-High     | -1.3848  | 1.6334  | 0.3843  | 0.4616   | -1.7569 |
|                       | YieldQ1    | -1.1259  | 1.6467  | 0.1849  | 0.4823   | -0.1942 |
|                       | YieldQ2    | -0.4393  | -0.5446 | -1.2093 | 0.2836   | -0.1449 |
|                       | YieldQ3    | -0.3449  | -0.6065 | 0.7536  | -0.4732  | 0.0716  |
|                       | YieldQ4    | 1.3921   | 0.4542  | 0.0538  | 0.1046   | 0.1368  |
| Contributions to axes |            | Dim 1    | Dim 2   | Dim 3   | Dim 4    | Dim 5   |
|                       | ARID       | 3.2317   | 5.3588  | 9.1504  | 11.7603  | 25.3199 |
|                       | EQUAT      | 1.8565   | 5.7322  | 25.8154 | 4.7266   | 3.9337  |
|                       | MEDIT      | 10.4392  | 1.3622  | 0.1228  | 20.1831  | 0.0078  |
|                       | MONSO      | 1.4617   | 6.2128  | 7.459   | 1.115    | 7.9623  |
|                       | SUBTR      | 19.855   | 3.612   | 0.3904  | 4.9034   | 2.2999  |
|                       | TROPH      | 4.3585   | 18.9827 | 5.7837  | 7.2703   | 0.0369  |
|                       | 1-Very low | 8.6333   | 0.0796  | 0.4671  | 0.335    | 22.8058 |
|                       | 2-Low      | 1.00E-04 | 4.8456  | 3.8655  | 15.7548  | 0.2755  |
|                       | 3-Moderate | 0.366    | 0.6958  | 4.5548  | 20.5301  | 16.2806 |
|                       | 4-High     | 6.8141   | 11.6083 | 0.7096  | 1.2799   | 19.4204 |
|                       | YieldQ1    | 9.2905   | 24.331  | 0.3389  | 2.8812   | 0.4896  |
|                       | YieldQ2    | 2.6149   | 4.9187  | 26.7875 | 1.8416   | 0.5035  |
|                       | YieldQ3    | 2.2449   | 8.502   | 14.4969 | 7.1439   | 0.1713  |
|                       | YieldQ4    | 28.8336  | 3.7582  | 0.0583  | 0.275    | 0.4927  |
| Squared cosines       |            | Dim 1    | Dim 2   | Dim 3   | Dim 4    | Dim 5   |
|                       | ARID       | 0.0135   | 0.003   | 0.1026  | 0.4199   | 0.0613  |
|                       | CONT       | 0.0839   | 0.1228  | 0.0524  | 7.00E-04 | 0.3116  |
|                       | MEDIT      | 0.0528   | 0.0296  | 0.3599  | 0.2913   | 0.0015  |
|                       | MONSO      | 0.0605   | 0.027   | 0.0802  | 0.0469   | 0.3376  |
|                       | OCEAN      | 0.6876   | 0.0645  | 0.0033  | 0.0046   | 0.0088  |
|                       | SUBTR      | 0.0101   | 0.0239  | 0.1018  | 0.0215   | 0.0386  |
|                       | TROPH      | 0.004    | 0.2954  | 0.0324  | 6.00E-04 | 0.0063  |
|                       | 1-Very low | 0.0346   | 0.0147  | 0.0978  | 0.2982   | 0.1568  |

|            |        |        |        |          |        |
|------------|--------|--------|--------|----------|--------|
| 2-Low      | 0.039  | 0.2698 | 0.0142 | 0.0029   | 0.1393 |
| 3-Moderate | 0.1464 | 0.0282 | 0.0013 | 0.3032   | 0.0932 |
| 4-High     | 0.0046 | 0.3767 | 0.0499 | 0.0701   | 0.1181 |
| YieldQ1    | 0.021  | 0.21   | 0.4516 | 0.005    | 0      |
| YieldQ2    | 0.0898 | 0.1446 | 0.3961 | 8.00E-04 | 0.0576 |
| YieldQ3    | 0.2028 | 0.377  | 0.0156 | 0.001    | 0.0321 |
| YieldQ4    | 0.808  | 0.0108 | 0.0017 | 0.0142   | 0.0028 |

---

**Supplementary variable: Food security hotspot\***

|                 |       |         |         |         |         |         |
|-----------------|-------|---------|---------|---------|---------|---------|
| Coordinates     |       | Dim 1   | Dim 2   | Dim 3   | Dim 4   | Dim 5   |
|                 | CHINA | 1.6739  | 0.6611  | 0.1501  | -0.5657 | 0.7745  |
|                 | IGP   | -0.5768 | -0.1237 | -1.0116 | 0.315   | 0.3579  |
|                 | SB&A  | 0.9916  | 0.7665  | 0.3779  | -1.1441 | 0.0258  |
|                 | SEA   | -0.1772 | -0.3642 | 0.3135  | -0.1625 | -0.2534 |
|                 | SSA   | -1.2942 | 2.1601  | 0.9937  | -0.5978 | -0.3452 |
| Squared cosines |       | Dim 1   | Dim 2   | Dim 3   | Dim 4   | Dim 5   |
|                 | CHINA | 0.1563  | 0.0244  | 0.0013  | 0.0179  | 0.0335  |
|                 | IGP   | 0.0589  | 0.0027  | 0.1812  | 0.0176  | 0.0227  |
|                 | SB&A  | 0.0246  | 0.0147  | 0.0036  | 0.0327  | 0       |
|                 | SEA   | 0.0191  | 0.0806  | 0.0598  | 0.016   | 0.039   |
|                 | SSA   | 0.0935  | 0.2603  | 0.0551  | 0.0199  | 0.0066  |

---

**Supplementary variable: Emerging pathogens and pests, P&P or "key pests"**

|                 |                          |         |         |         |          |          |
|-----------------|--------------------------|---------|---------|---------|----------|----------|
| Coordinates     |                          | Dim 1   | Dim 2   | Dim 3   | Dim 4    | Dim 5    |
|                 | Bacterial panicle blight | -0.7796 | 0.6307  | 0.6513  | 0.2116   | 0.5918   |
|                 | False smut               | 0.0022  | -0.3997 | -1.0046 | -0.1976  | 0.1291   |
| Squared cosines |                          | Dim 1   | Dim 2   | Dim 3   | Dim 4    | Dim 5    |
|                 | Bacterial panicle blight | 0.0178  | 0.0117  | 0.0124  | 0.0013   | 0.0103   |
|                 | False smut               | 0       | 0.0033  | 0.0209  | 8.00E-04 | 3.00E-04 |

---

**Maize correspondence analysis**

**Active variables: Climate<sup>†</sup>, loss magnitude and yield quartile**

|                       |            |         |         |         |         |         |
|-----------------------|------------|---------|---------|---------|---------|---------|
| Coordinates           |            | Dim 1   | Dim 2   | Dim 3   | Dim 4   | Dim 5   |
|                       | ARID       | 0.7118  | -0.3952 | 0.0852  | 1.6524  | -0.2998 |
|                       | CONT       | -1.0777 | 0.7275  | -0.5937 | 0.1736  | 0.6119  |
|                       | EQUAT      | 1.2086  | 0.2296  | 3.2876  | 3.2532  | 6.6471  |
|                       | MEDIT      | -1.0432 | 0.7672  | -0.5699 | 0.2809  | -0.2165 |
|                       | MONSO      | 1.1267  | -1.1121 | -1.7845 | -0.7137 | 0.8018  |
|                       | OCEAN      | -1.1031 | -1.1922 | 1.2699  | -0.7694 | 1.4748  |
|                       | SUBTR      | -0.6008 | -0.8852 | 0.4114  | -0.325  | -1.0062 |
|                       | TROPH      | 0.9249  | 0.8871  | 0.5951  | -0.5062 | -0.2437 |
|                       | 1-Very low | -1.0331 | -0.4273 | 0.119   | -0.502  | 0.4516  |
|                       | 2-Low      | -0.1585 | 0.7065  | -0.1548 | 0.1979  | -0.5953 |
|                       | 3-Moderate | 0.4782  | -0.6773 | 0.2081  | 0.8444  | 0.2819  |
|                       | 4-High     | 1.4458  | 0.167   | -0.229  | -1.6446 | 0.3623  |
|                       | YieldQ1    | 1.0316  | 0.8443  | 1.2311  | -0.0696 | 0.2606  |
|                       | YieldQ2    | 0.8451  | -0.5677 | -0.7945 | 0.1131  | -0.2067 |
|                       | YieldQ3    | -0.9518 | 1.5253  | -1.0722 | 0.276   | 0.4617  |
|                       | YieldQ4    | -0.9016 | -0.5304 | 0.4505  | -0.1659 | -0.1332 |
| Contributions to axes |            | Dim 1   | Dim 2   | Dim 3   | Dim 4   | Dim 5   |
|                       | ARID       | 3.1011  | 1.2446  | 0.0695  | 30.3614 | 1.1445  |

|                 |            |         |          |         |         |         |
|-----------------|------------|---------|----------|---------|---------|---------|
|                 | CONT       | 9.7283  | 5.7718   | 4.6189  | 0.4584  | 6.5227  |
|                 | EQUAT      | 0.4706  | 0.0221   | 5.4476  | 6.1938  | 29.6013 |
|                 | MEDIT      | 3.1559  | 2.2223   | 1.473   | 0.4157  | 0.2827  |
|                 | MONSO      | 5.7262  | 7.2632   | 22.4709 | 4.1737  | 6.0302  |
|                 | OCEAN      | 2.7442  | 4.1738   | 5.6895  | 2.4251  | 10.2008 |
|                 | SUBTR      | 3.2565  | 9.204    | 2.3891  | 1.7309  | 18.9926 |
|                 | TROPH      | 9.3708  | 11.2233  | 6.068   | 5.0993  | 1.3532  |
|                 | 1-Very low | 11.0032 | 2.4511   | 0.2285  | 4.7187  | 4.3723  |
|                 | 2-Low      | 0.4211  | 10.8893  | 0.6284  | 1.1918  | 12.3481 |
|                 | 3-Moderate | 2.7991  | 7.313    | 0.8291  | 15.8558 | 2.0225  |
|                 | 4-High     | 10.7751 | 0.1872   | 0.4227  | 25.3273 | 1.4069  |
|                 | YieldQ1    | 8.9148  | 7.775    | 19.8602 | 0.0737  | 1.183   |
|                 | YieldQ2    | 9.8943  | 5.8135   | 13.6807 | 0.3218  | 1.2313  |
|                 | YieldQ3    | 5.5453  | 18.5442  | 11.0084 | 0.8468  | 2.7139  |
|                 | YieldQ4    | 13.0934 | 5.9016   | 5.1155  | 0.8056  | 0.5942  |
| Squared cosines |            | Dim 1   | Dim 2    | Dim 3   | Dim 4   | Dim 5   |
|                 | ARID       | 0.0809  | 0.0249   | 0.0012  | 0.4359  | 0.0144  |
|                 | CONT       | 0.2696  | 0.1228   | 0.0818  | 0.007   | 0.0869  |
|                 | EQUAT      | 0.0107  | 4.00E-04 | 0.0789  | 0.0772  | 0.3225  |
|                 | MEDIT      | 0.0759  | 0.0411   | 0.0227  | 0.0055  | 0.0033  |
|                 | MONSO      | 0.1433  | 0.1396   | 0.3595  | 0.0575  | 0.0726  |
|                 | OCEAN      | 0.065   | 0.076    | 0.0862  | 0.0316  | 0.1162  |
|                 | SUBTR      | 0.0919  | 0.1995   | 0.0431  | 0.0269  | 0.2577  |
|                 | TROPH      | 0.2797  | 0.2573   | 0.1158  | 0.0838  | 0.0194  |
|                 | 1-Very low | 0.3222  | 0.0551   | 0.0043  | 0.0761  | 0.0616  |
|                 | 2-Low      | 0.0152  | 0.3018   | 0.0145  | 0.0237  | 0.2143  |
|                 | 3-Moderate | 0.0869  | 0.1743   | 0.0164  | 0.2709  | 0.0302  |
|                 | 4-High     | 0.2741  | 0.0037   | 0.0069  | 0.3547  | 0.0172  |
|                 | YieldQ1    | 0.2471  | 0.1655   | 0.3518  | 0.0011  | 0.0158  |
|                 | YieldQ2    | 0.3233  | 0.1459   | 0.2857  | 0.0058  | 0.0193  |
|                 | YieldQ3    | 0.1446  | 0.3715   | 0.1835  | 0.0122  | 0.034   |
|                 | YieldQ4    | 0.4618  | 0.1599   | 0.1153  | 0.0156  | 0.0101  |

---

**Supplementary variable: Food security hotspot'**

|                 |       |          |         |         |          |         |
|-----------------|-------|----------|---------|---------|----------|---------|
| Coordinates     |       | Dim 1    | Dim 2   | Dim 3   | Dim 4    | Dim 5   |
|                 | CHINA | 0.0191   | -0.6933 | -0.4105 | -0.1084  | -1.0854 |
|                 | IGP   | 1.0962   | -0.8129 | -1.3653 | 0.0122   | 0.2418  |
|                 | NWE   | -1.1031  | -1.1922 | 1.2699  | -0.7694  | 1.4748  |
|                 | SB&A  | 0.0791   | 0.3918  | -0.3416 | -0.2739  | -0.5663 |
|                 | SEA   | 0.4174   | -1.2198 | -1.711  | -0.8905  | 0.9677  |
|                 | SSA   | 1.0447   | 0.7866  | 1.1327  | -0.1104  | 0.2335  |
|                 | USM&C | -1.0619  | 0.4834  | -0.4215 | 0.0797   | 0.4403  |
| Squared cosines |       | Dim 1    | Dim 2   | Dim 3   | Dim 4    | Dim 5   |
|                 | CHINA | 0        | 0.0218  | 0.0077  | 5.00E-04 | 0.0536  |
|                 | IGP   | 0.1357   | 0.0746  | 0.2105  | 0        | 0.0066  |
|                 | NWE   | 0.065    | 0.076   | 0.0862  | 0.0316   | 0.1162  |
|                 | SB&A  | 3.00E-04 | 0.007   | 0.0053  | 0.0034   | 0.0146  |
|                 | SEA   | 0.0013   | 0.0109  | 0.0214  | 0.0058   | 0.0068  |
|                 | SSA   | 0.2778   | 0.1575  | 0.3266  | 0.0031   | 0.0139  |

|                                                                                     | USM&C                 | 0.3132  | 0.0649   | 0.0493  | 0.0018   | 0.0539   |
|-------------------------------------------------------------------------------------|-----------------------|---------|----------|---------|----------|----------|
| <b>Supplementary variable: Emerging pathogens and pests, P&amp;P or "key pests"</b> |                       |         |          |         |          |          |
| Coordinates                                                                         |                       | Dim 1   | Dim 2    | Dim 3   | Dim 4    | Dim 5    |
|                                                                                     | fall armyworm         | 0.8567  | 0.3288   | 0.9887  | -1.1004  | -0.0306  |
|                                                                                     | maize lethal necrosis | 1.2561  | 0.4459   | 0.5584  | -0.7145  | 0.0973   |
|                                                                                     | striga                | 1.2976  | 0.8546   | 1.2629  | -0.7882  | 0.3134   |
| Squared cosines                                                                     |                       | Dim 1   | Dim 2    | Dim 3   | Dim 4    | Dim 5    |
|                                                                                     | fall armyworm         | 0.0163  | 0.0024   | 0.0217  | 0.0269   | 0        |
|                                                                                     | maize lethal necrosis | 0.0232  | 0.0029   | 0.0046  | 0.0075   | 1.00E-04 |
|                                                                                     | striga                | 0.0248  | 0.0107   | 0.0235  | 0.0091   | 0.0014   |
| <b>Potato correspondence analysis</b>                                               |                       |         |          |         |          |          |
| <b>Active variables: Climate†, loss magnitude and yield quartile</b>                |                       |         |          |         |          |          |
| Coordinates                                                                         |                       | Dim 1   | Dim 2    | Dim 3   | Dim 4    | Dim 5    |
|                                                                                     | ARID                  | 0.4362  | -0.0085  | -0.3212 | 0.2665   | 1.1148   |
|                                                                                     | CONT                  | -0.4467 | -0.6529  | -0.505  | -0.023   | -1.1028  |
|                                                                                     | MEDIT                 | 0.6949  | 0.4959   | -1.3869 | 0.8234   | 0.6054   |
|                                                                                     | MONSO                 | -1.7143 | -0.6657  | 0.6282  | 0.1818   | 1.3411   |
|                                                                                     | OCEAN                 | 1.4238  | -0.9256  | 1.2338  | 0.0715   | -0.2193  |
|                                                                                     | SUBTR                 | -0.1052 | 0.0785   | -0.1223 | -2.0207  | 0.2289   |
|                                                                                     | TROPH                 | -0.1336 | 1.8441   | 0.784   | 0.1837   | -0.3681  |
|                                                                                     | 1-Very low            | 1.1821  | -0.7002  | 0.3527  | 1.2988   | 1.1057   |
|                                                                                     | 2-Low                 | 0.5146  | 0.1448   | 0.0905  | -1.0868  | -0.159   |
|                                                                                     | 3-Moderate            | 0.1399  | 0.069    | -0.6562 | 0.5865   | -0.4369  |
|                                                                                     | 4-High                | -1.1512 | -0.0472  | 0.6956  | 0.0423   | 0.4481   |
|                                                                                     | YieldQ1               | -0.7748 | 2.3714   | 2.6275  | 1.8591   | -1.9002  |
|                                                                                     | YieldQ2               | -0.8144 | -0.4968  | -0.2643 | 0.0036   | -0.1062  |
|                                                                                     | YieldQ3               | 0.3091  | 1.3515   | -0.4667 | -0.3117  | 0.4752   |
|                                                                                     | YieldQ4               | 1.1955  | -0.7021  | 0.5527  | 0.0498   | -0.0216  |
| Contributions to axes                                                               |                       | Dim 1   | Dim 2    | Dim 3   | Dim 4    | Dim 5    |
|                                                                                     | ARID                  | 1.1461  | 5.00E-04 | 0.9124  | 0.6882   | 13.0343  |
|                                                                                     | CONT                  | 2.6047  | 6.2368   | 4.8854  | 0.0112   | 27.6361  |
|                                                                                     | MEDIT                 | 3.071   | 1.7527   | 17.9494 | 6.9334   | 4.0577   |
|                                                                                     | MONSO                 | 15.7393 | 2.6593   | 3.1011  | 0.2846   | 16.7662  |
|                                                                                     | OCEAN                 | 13.5706 | 6.4267   | 14.9527 | 0.055    | 0.5606   |
|                                                                                     | SUBTR                 | 0.0519  | 0.0324   | 0.1029  | 30.768   | 0.4272   |
|                                                                                     | TROPH                 | 0.1434  | 30.6139  | 7.2447  | 0.4358   | 1.8948   |
|                                                                                     | 1-Very low            | 5.6124  | 2.2069   | 0.7334  | 10.8945  | 8.548    |
|                                                                                     | 2-Low                 | 3.9891  | 0.354    | 0.1811  | 28.6052  | 0.6627   |
|                                                                                     | 3-Moderate            | 0.3536  | 0.0964   | 11.4205 | 9.997    | 6.0045   |
|                                                                                     | 4-High                | 17.2989 | 0.0326   | 9.2683  | 0.0375   | 4.5627   |
|                                                                                     | YieldQ1               | 1.0046  | 10.547   | 16.9544 | 9.3009   | 10.5191  |
|                                                                                     | YieldQ2               | 15.097  | 6.2947   | 2.3339  | 5.00E-04 | 0.4466   |
|                                                                                     | YieldQ3               | 1.1831  | 25.3508  | 3.9587  | 1.9349   | 4.8686   |
|                                                                                     | YieldQ4               | 19.1344 | 7.3953   | 6.001   | 0.0533   | 0.0108   |
| Squared cosines                                                                     |                       | Dim 1   | Dim 2    | Dim 3   | Dim 4    | Dim 5    |
|                                                                                     | ARID                  | 0.0259  | 0        | 0.0141  | 0.0097   | 0.1695   |
|                                                                                     | CONT                  | 0.0701  | 0.1498   | 0.0896  | 2.00E-04 | 0.4273   |
|                                                                                     | MEDIT                 | 0.07    | 0.0357   | 0.279   | 0.0983   | 0.0532   |

|            |        |          |        |          |          |
|------------|--------|----------|--------|----------|----------|
| MONSO      | 0.3509 | 0.0529   | 0.0471 | 0.0039   | 0.2147   |
| OCEAN      | 0.3119 | 0.1318   | 0.2342 | 8.00E-04 | 0.0074   |
| SUBTR      | 0.0011 | 6.00E-04 | 0.0015 | 0.4203   | 0.0054   |
| TROPH      | 0.0034 | 0.6478   | 0.1171 | 0.0064   | 0.0258   |
| 1-Very low | 0.1215 | 0.0426   | 0.0108 | 0.1467   | 0.1063   |
| 2-Low      | 0.1135 | 0.009    | 0.0035 | 0.5062   | 0.0108   |
| 3-Moderate | 0.011  | 0.0027   | 0.2422 | 0.1935   | 0.1073   |
| 4-High     | 0.4656 | 8.00E-04 | 0.17   | 6.00E-04 | 0.0705   |
| YieldQ1    | 0.0207 | 0.1939   | 0.2381 | 0.1192   | 0.1245   |
| YieldQ2    | 0.55   | 0.2047   | 0.0579 | 0        | 0.0093   |
| YieldQ3    | 0.0313 | 0.5981   | 0.0713 | 0.0318   | 0.0739   |
| YieldQ4    | 0.5197 | 0.1792   | 0.1111 | 9.00E-04 | 2.00E-04 |

---

**Supplementary variable: Food security hotspot'**

|                 |       |          |         |         |          |         |
|-----------------|-------|----------|---------|---------|----------|---------|
| Coordinates     |       | Dim 1    | Dim 2   | Dim 3   | Dim 4    | Dim 5   |
|                 | CHINA | -1.0255  | -0.4172 | 0.2812  | -1.161   | 0.7196  |
|                 | IGP   | -1.181   | -0.5572 | 0.2352  | 0.3307   | 1.2017  |
|                 | NWE   | 1.5526   | -0.9239 | 1.201   | 0.0364   | -0.2728 |
|                 | SB&A  | 0.2667   | 0.8648  | -0.6424 | -2.085   | 0.355   |
|                 | SSA   | 0.047    | 0.7235  | 1.0516  | 0.9414   | -0.1731 |
|                 | USM&C | 0.746    | -0.8394 | 0.1662  | -0.2138  | -0.7532 |
|                 | WANA  | 0.3241   | 0.3107  | -0.9341 | 0.5402   | 1.0256  |
| Squared cosines |       | Dim 1    | Dim 2   | Dim 3   | Dim 4    | Dim 5   |
|                 | CHINA | 0.0142   | 0.0024  | 0.0011  | 0.0182   | 0.007   |
|                 | IGP   | 0.155    | 0.0345  | 0.0061  | 0.0121   | 0.1605  |
|                 | NWE   | 0.2288   | 0.081   | 0.1369  | 1.00E-04 | 0.0071  |
|                 | SB&A  | 0.001    | 0.0101  | 0.0056  | 0.0587   | 0.0017  |
|                 | SSA   | 2.00E-04 | 0.0539  | 0.1138  | 0.0912   | 0.0031  |
|                 | USM&C | 0.0232   | 0.0294  | 0.0012  | 0.0019   | 0.0236  |
|                 | WANA  | 0.0059   | 0.0054  | 0.0492  | 0.0164   | 0.0593  |

---

**Supplementary variable: Emerging pathogens and pests, P&P or "key pests"**

|                 |           |         |        |        |        |         |
|-----------------|-----------|---------|--------|--------|--------|---------|
| Coordinates     |           | Dim 1   | Dim 2  | Dim 3  | Dim 4  | Dim 5   |
|                 | Brown rot | -0.6554 | 1.1729 | 1.3524 | 0.4148 | -0.2236 |
| Squared cosines |           | Dim 1   | Dim 2  | Dim 3  | Dim 4  | Dim 5   |
|                 | Brown rot | 0.0242  | 0.0775 | 0.103  | 0.0097 | 0.0028  |

---

**Soybean correspondence analysis**

**Active variables: Climate<sup>†</sup>, loss magnitude and yield quartile**

|             |            |         |         |         |         |         |
|-------------|------------|---------|---------|---------|---------|---------|
| Coordinates |            | Dim 1   | Dim 2   | Dim 3   | Dim 4   | Dim 5   |
|             | CONT       | -0.7605 | -0.5173 | 1.1755  | -1.0211 | 0.8108  |
|             | SUBTR      | -0.4432 | 0.2624  | -0.3932 | 0.5111  | -0.2811 |
|             | TROPH      | 1.4053  | -0.1365 | -0.0831 | -0.2562 | -0.0382 |
|             | 1-Very low | -0.9126 | 0.4431  | -1.1817 | -0.0549 | 0.6361  |
|             | 2-Low      | -0.3544 | -0.1754 | 0.6626  | 0.031   | -0.8967 |
|             | 3-Moderate | 0.8065  | -1.0017 | -0.3601 | 0.1325  | 0.6906  |
|             | 4-High     | 1.1853  | 1.4966  | 0.5401  | -0.2275 | 0.4911  |
|             | YieldQ1    | 1.0491  | 1.3287  | 0.7278  | 0.6422  | 0.299   |
|             | YieldQ2    | -0.65   | -0.8626 | 0.6226  | 1.4323  | 0.6039  |
|             | YieldQ3    | 1.0866  | -0.6775 | -0.5911 | -0.346  | -0.5093 |
|             | YieldQ4    | -0.8272 | 0.2807  | -0.1951 | -0.6787 | -0.0656 |

|                                                                                     |              |          |         |          |          |          |
|-------------------------------------------------------------------------------------|--------------|----------|---------|----------|----------|----------|
| Contributions to axes                                                               |              | Dim 1    | Dim 2   | Dim 3    | Dim 4    | Dim 5    |
|                                                                                     | CONT         | 5.2419   | 4.1825  | 23.0931  | 20.0084  | 14.6417  |
|                                                                                     | SUBTR        | 4.7992   | 2.9002  | 6.9639   | 13.5095  | 4.7429   |
|                                                                                     | TROPH        | 24.9036  | 0.4053  | 0.1607   | 1.7527   | 0.0452   |
|                                                                                     | 1-Very low   | 8.5337   | 3.468   | 26.384   | 0.0653   | 10.1879  |
|                                                                                     | 2-Low        | 2.3758   | 1.0035  | 15.3147  | 0.0385   | 37.379   |
|                                                                                     | 3-Moderate   | 6.9207   | 18.408  | 2.5445   | 0.3957   | 12.472   |
|                                                                                     | 4-High       | 8.8576   | 24.351  | 3.3921   | 0.6909   | 3.7365   |
|                                                                                     | YieldQ1      | 8.2406   | 22.791  | 7.3141   | 6.5365   | 1.6447   |
|                                                                                     | YieldQ2      | 3.4968   | 10.6169 | 5.9151   | 35.9428  | 7.4174   |
|                                                                                     | YieldQ3      | 13.9568  | 9.3566  | 7.6177   | 2.9959   | 7.5368   |
|                                                                                     | YieldQ4      | 12.6733  | 2.5169  | 1.3      | 18.0638  | 0.1958   |
| Squared cosines                                                                     |              | Dim 1    | Dim 2   | Dim 3    | Dim 4    | Dim 5    |
|                                                                                     | CONT         | 0.1415   | 0.0655  | 0.3381   | 0.2551   | 0.1608   |
|                                                                                     | SUBTR        | 0.2214   | 0.0776  | 0.1742   | 0.2944   | 0.089    |
|                                                                                     | TROPH        | 0.7435   | 0.007   | 0.0026   | 0.0247   | 5.00E-04 |
|                                                                                     | 1-Very low   | 0.238    | 0.0561  | 0.399    | 9.00E-04 | 0.1156   |
|                                                                                     | 2-Low        | 0.0874   | 0.0214  | 0.3054   | 7.00E-04 | 0.5594   |
|                                                                                     | 3-Moderate   | 0.1951   | 0.301   | 0.0389   | 0.0053   | 0.1431   |
|                                                                                     | 4-High       | 0.2226   | 0.3548  | 0.0462   | 0.0082   | 0.0382   |
|                                                                                     | YieldQ1      | 0.2134   | 0.3423  | 0.1027   | 0.0799   | 0.0173   |
|                                                                                     | YieldQ2      | 0.0924   | 0.1628  | 0.0848   | 0.4488   | 0.0798   |
|                                                                                     | YieldQ3      | 0.4071   | 0.1583  | 0.1205   | 0.0413   | 0.0895   |
|                                                                                     | YieldQ4      | 0.4594   | 0.0529  | 0.0256   | 0.3093   | 0.0029   |
| <b>Supplementary variable: Food security hotspot'</b>                               |              |          |         |          |          |          |
| Coordinates                                                                         |              | Dim 1    | Dim 2   | Dim 3    | Dim 4    | Dim 5    |
|                                                                                     | CHINA        | 0.116    | 1.1254  | 0.8479   | 1.1559   | -0.9958  |
|                                                                                     | SB&A         | -0.1288  | -0.2463 | -0.1543  | 1.1948   | -0.0735  |
|                                                                                     | SSA          | 1.5173   | 1.5348  | 0.8871   | 0.2644   | 0.6071   |
|                                                                                     | USM&C        | -0.7922  | -0.2628 | 0.7069   | -0.8252  | 0.5244   |
| Squared cosines                                                                     |              | Dim 1    | Dim 2   | Dim 3    | Dim 4    | Dim 5    |
|                                                                                     | CHINA        | 1.00E-04 | 0.0109  | 0.0062   | 0.0115   | 0.0085   |
|                                                                                     | SB&A         | 0.0043   | 0.0157  | 0.0061   | 0.3684   | 0.0014   |
|                                                                                     | SSA          | 0.2389   | 0.2444  | 0.0817   | 0.0073   | 0.0382   |
|                                                                                     | USM&C        | 0.2164   | 0.0238  | 0.1723   | 0.2348   | 0.0948   |
| <b>Supplementary variable: Emerging pathogens and pests, P&amp;P or "key pests"</b> |              |          |         |          |          |          |
| Coordinates                                                                         |              | Dim 1    | Dim 2   | Dim 3    | Dim 4    | Dim 5    |
|                                                                                     | soybean rust | 0.7663   | 0.6298  | -0.0219  | 0.1395   | 0.1086   |
| Squared cosines                                                                     |              | Dim 1    | Dim 2   | Dim 3    | Dim 4    | Dim 5    |
|                                                                                     | soybean rust | 0.1678   | 0.1133  | 1.00E-04 | 0.0056   | 0.0034   |

\* USM&C=US Midwest and Canada; SB&A=South Brazil, Paraguay, Uruguay and Argentina; NWE=Northwest Europe; WANA=West Asia and North Africa; SSA=Sub-Saharan Africa; CHINA=Mainland China; IGP=Indo-Gangetic Plain; SEA=Southeast Asia.

† ARID=Arid; CONT=Humid continental; EQUAT=Equatorial; MEDIT= Mediterranean; MONSO= Monsoon; OCEAN=Oceanic; SUBTR=Subtropics; TROPH=Humid tropics.

**Supplementary Note 1.** Email sent by Serge Savary, Vice-President of the ISPP and Chair of the ISPP Subject Matter Committee on Crop Losses to the members of the ISPP.

Dear Colleague,

This e-mail is sent to you as a member of the ISPP, to invite you to contribute to a global survey on the losses caused by crop diseases and pests. If you would like to participate in this global effort, please use the following link

<https://globalcrophealth.org/>

which will provide you with information about this project, and which take you directly to the survey questionnaire. The questionnaire has been devised to be simple and flexible, so that you would need as little of your time to provide inputs. This is a global effort, which is undertaken under the aegis of the ISPP. We cannot possibly have reached all potential contributors to this survey. Please feel free to circulate this message to colleagues.

The questionnaire will be open for 3 months. We would be very glad if you could respond to this questionnaire as soon as you possibly can within the coming 3 months (i.e., before end of January, 2017). Any results that can yield analyses will be reported with due recognition of contributors to the survey.

For further queries please e-mail to: ([survey@globalcrophealth.org](mailto:survey@globalcrophealth.org))

Sincerely,

S. Savary, Chair, ISPP Crop Loss Subject Matter Committee, Centre INRA de Toulouse, France

A. Nelson, ITC, University of Twente, The Netherlands

L. Willocquet, Centre INRA de Toulouse, France

Sarah Pethybridge, Cornell University

Asimina Mila, North Carolina State University

Paul Esker, University of Costa Rica



**Supplementary Note 2.** Note published in the ISPP Newsletter of November 2016<sup>49</sup>, republished with permission of the ISPP, announcing the conduct of the survey to the total membership of the ISPP.

### **ISPP Launches a Global Crop Loss Survey**

Quantification of the importance of crop diseases and pests is a necessary first step towards better understanding of crop health and its management. However, the information pertaining to the losses caused by plant diseases and pests in agriculture is fragmented, heterogeneous, and is very incomplete. ISPP has been considering undertaking a survey on crop losses for a long time. Documenting the importance of crop diseases and pests is also one goal of several international research networks, such as AgMiP and MacSur. This project has first been discussed by the Crop Loss Subject Matter Committee of the International Society for Plant Pathology during its first meeting in August 2013 in Beijing.

With this article (and a message which should also be sent to you by ISPP), you are invited to contribute to this survey. If you would like to participate in this global effort, **please use the link below**:

<http://globalcrophealth.org/>

This link will direct you to a survey questionnaire. The questionnaire has been devised to be simple and flexible, so that you would need as little of your time to provide inputs. If you have any queries about this survey, please **email us**.

### **About the survey**

This survey is intended to help document crop losses in major world crops. The information sought on each crop disease or pest (location, frequency and loss) is very simplified, in order to both reduce the time required to answering the questionnaire, and to generate homogeneous information across multiple diseases and pests of several crops.

At this stage, the survey focuses on five major crops worldwide: wheat, rice, potato, soybean, and maize. It might be expanded to other crops in the future. For each of these five crops, up to 10 pests and diseases have been listed. These are only suggestions, and the survey forms provide opportunity to submit information on other pests and diseases as well. Common names and scientific names of suggested pathogens and pests are tabulated below.

**The survey asks contributors to provide their name, institute and e-mail address. Providing this information is optional. However, this will enable the recognition of contributions in future reports.**

Hopefully, this survey will collect as many inputs from numerous contributors worldwide, on as many diseases and pests as possible. **The survey will end on 31 Jan 2017. If the survey is successful in eliciting a sufficient number of responses, a report will be made public by 31 Apr 2017, where the detail of individual contributions will not be presented, but where contributions will be explicitly acknowledged.**

### **Thanking everyone for your support in this effort,**

S. Savary, INRA, Centre INRA de Toulouse, France ; Chair, Crop Loss Subject Matter Committee of the ISPP;

A. Nelson, ITC, University of Twente, The Netherlands;

L. Willocquet, INRA, Centre INRA de Toulouse, France ;

Sarah Pethybridge, Cornell University, USA;

Asimina Mila, North Carolina State University, USA;

Paul Esker, University of Costa Rica.

## Lists of pests and diseases for the web-based survey of global crop health assessment

### Potato

| Disease or pest: common name  | Scientific (Latin) name                                    |
|-------------------------------|------------------------------------------------------------|
| Late blight                   | Phytophthora infestans                                     |
| Cyst nematode                 | Globodera rostochiensis, G. pallida                        |
| Early blight                  | Alternaria solani                                          |
| Early dying/Verticillium wilt | Verticillium albo-atrum, V. dahlia, Pratylenchus penetrans |
| Colorado potato beetle        | Leptinotarsa decemlineata                                  |
| Potato leafhopper             | Empoasca fabae                                             |
| Potato spindle tuber viroid   |                                                            |
| Common scab                   | Streptomyces scabies                                       |
| Powdery scab                  | Spongospora subterranea                                    |
| Other                         |                                                            |

### Maize

| Disease or pest: common name       | Scientific (Latin) name                                        |
|------------------------------------|----------------------------------------------------------------|
| Northern corn leaf blight          | Exserohilum turcicum, Setosphaeria turcica                     |
| Southern rust                      | Puccinia polysora                                              |
| Maize streak                       | Maize streak virus                                             |
| African stem borer                 | Busseola fusca, Sesamia calamistris                            |
| European stem borer                | Ostrinia nubilalis                                             |
| Diabrotica beetle and rootworm     | Diabrotica balteata, D. virgifera, D. longicornis, D. speciosa |
| Diplodia ear and stem rot          | Diplodia frumenti                                              |
| Fusarium and Gibberella stalk rots | Fusarium moniliforme, F. graminearum                           |
| Fusarium and Gibberella ear rots   | Fusarium moniliforme, F. graminearum                           |
| Other                              |                                                                |

### Soybean

| Disease or pest: common name     | Scientific (Latin) name                                   |
|----------------------------------|-----------------------------------------------------------|
| White mold                       | Sclerotinia sclerotiorum                                  |
| Soybean rust                     | Phakopsora pachyrhizi                                     |
| Cyst nematode                    | Heterodera glycines                                       |
| Sudden death                     | Fusarium virguliforme, F. tucumaniae, Heterodera glycines |
| Armyworm                         | Spodopora exigua, S. praefica                             |
| Phytophthora root and stem rot   | Phytophthora sojae                                        |
| Rhizoctonia root rot, web blight | Rhizoctonia solani                                        |
| Pythium damping-off              | Pythium spp.                                              |
| Soybean mosaic                   | Soybean mosaic virus                                      |
| Other                            |                                                           |

### Wheat

| Disease or pest: common name           | Scientific (Latin) name                                                      |
|----------------------------------------|------------------------------------------------------------------------------|
| Septoria (Zymoseptoria) tritici blotch | Zymoseptoria tritici                                                         |
| Stagonospora nodorum blotch            | Stagonospora avenae f. sp. tritici, Parastagonospora (Phaeosphaeria) nodorum |
| Leaf (brown) rust                      | Puccinia triticina                                                           |
| Stem (black) rust                      | Puccinia graminis f. sp. tritici                                             |
| Stripe (yellow) rust                   | Puccinia striiformis f. sp. tritici                                          |
| Fusarium head blight – Scab            | Fusarium spp., Microdochium spp.                                             |
| Tan spot                               | Pyrenophora tritici-repentis                                                 |
| Spot blotch                            | Cochliobolus sativus                                                         |
| Barley yellow dwarf (BYD)              | BYD viruses                                                                  |
| Aphids                                 | Sitobion avenae, Rhopalosiphum padi, Diuraphis noxia                         |
| Other                                  |                                                                              |

### Rice

| Disease or pest: common name | Scientific (Latin) name                                      |
|------------------------------|--------------------------------------------------------------|
| Bacterial blight             | Xanthomonas oryzae pv. oryzae                                |
| Leaf, neck, or panicle blast | Pyricularia oryzae                                           |
| Sheath blight                | Rhizoctonia solani                                           |
| Rice tungro                  | RTB virus and RTS virus                                      |
| Ragged stunt                 | RRS virus                                                    |
| Brown spot                   | Cochliobolus miyabeanus                                      |
| Sheath rot                   | Sarocladium oryzae                                           |
| Stem borers                  | Scirpophaga incertulas, Chilo suppressalis, Sesamia inferens |
| Brown plant hopper           | Nilaparvata lugens                                           |
| Other                        |                                                              |

## Supplementary References

85. Murrall, D. J., Nault, L. R., Hoy, C. W., Madden, L. V. & Miller, S. A. Effects of temperature and vector age on transmission of two Ohio strains of aster yellows phytoplasma by the aster leafhopper (Homoptera: Cicadellidae). *Journal of Economic Entomology* **89**, 1223–1232 (1996).
86. Miller, W. A. & Rasochová, L. Barley yellow dwarf viruses. *Annual Review of Phytopathology* **35**, 167–190 (1997).
87. Fernandez, M. R., Clarke, J. M., De Pauw, R. M., Knox, R. E. & Irvine, R. B. Black point and red smudge in irrigated durum wheat in Southern Saskatchewan in 1990-1992. *Canadian Journal of Plant Pathology* **16**, 221–227 (1994).
88. Meagher, J. W. World dissemination of the cereal-cyst nematode (*Heterodera avenae*) and its potential as a pathogen of wheat. *Journal of Nematology* **9**, 9–15 (1977).
89. Chakraborty, S. *et al.* Pathogen population structure and epidemiology are keys to wheat crown rot and Fusarium head blight management. *Australasian Plant Pathology* **35**, 643–655 (2006).
90. Nash, M. A. & Hoffmann, A. A. Effective invertebrate pest management in dryland cropping in southern Australia: The challenge of marginality. *Crop Protection* **42**, 289–304 (2012).
91. Johansson, P. M., Johnsson, L. & Gerhardson, B. Suppression of wheat-seedling diseases caused by *Fusarium culmorum* and *Microdochium nivale* using bacterial seed treatment. *Plant Pathology* **52**, 219–227 (2003).
92. El-Hag, E. T. A. & El-Meleigi, M. A. Bionomics of the wheat leafminer, *Agromyza* sp. (Diptera: Agromyzidae) in Central Saudi Arabia. *Crop Protection* **10**, 70–73 (1991).
93. Smiley, R. W., Yan, G. P. & Handoo, Z. A. First record of the cyst nematode *Heterodera filipjevi* on wheat in Oregon. *Plant Disease* **92**, 1136–1136 (2008).
94. Bolton, M. D., Kolmer, J. A. & Garvin, D. F. Wheat leaf rust caused by *Puccinia triticina*. *Molecular Plant Pathology* **9**, 563–575 (2008).

95. Smiley, R. W., Whittaker, R. G., Gourlie, J. A. & Easley, S. A. Suppression of wheat growth and yield by *Pratylenchus neglectus* in the Pacific Northwest. *Plant Disease* **89**, 958–968 (2005).
96. Nicol, J. M., Davies, K. A., Hancock, T. W. & Fisher, J. M. Yield loss caused by *Pratylenchus thornei* on wheat in South Australia. *Journal of nematology* **31**, 367–376 (1999).
97. Batts, C. C. V. & Jeater, A. The development of loose smut (*Ustilago tritici*) in susceptible varieties of wheat, and some observations on field infection. *Transactions of the British Mycological Society* **41**, 115–125 (1958).
98. Sharma, H. C., Sullivan, D. J. & Bhatnagar, V. S. Population dynamics and natural mortality factors of the Oriental armyworm, *Mythimna separata* (Lepidoptera: Noctuidae), in South-Central India. *Crop Protection* **21**, 721–732 (2002).
99. Cowger, C. *et al.* in *Disease resistance in wheat*. 84–119 (CABI, 2012).
100. Schillinger, W. F. & Paulitz, T. C. Reduction of *Rhizoctonia* bare patch in wheat with barley rotations. *Plant Disease* **90**, 302–306 (2006).
101. Burd, J. D., Burton, R. L. & Webster, J. A. Evaluation of Russian wheat aphid (Homoptera, Aphididae) damage on resistant and susceptible hosts with comparisons of damage ratings to quantitative plant measurements. *Journal of Economic Entomology* **86**, 974–980 (1993).
102. Torriani, S. F. F. *et al.* *Zymoseptoria tritici*: a major threat to wheat production, integrated approaches to control. *Fungal Genetics and Biology* **79**, 8–12 (2015).
103. Lipps, P. E. & Herr, L. J. Etiology of *Rhizoctonia cerealis* in sharp eyespot of wheat. *Phytopathology* **72**, 1574–1577 (1982).
104. Duveiller, E., Kandel, Y. R., Sharma, R. C. & Shrestha, S. M. Epidemiology of foliar blights (spot blotch and tan spot) of wheat in the plains bordering the Himalayas. *Phytopathology* **95**, 248–256 (2005).
105. Quaedy, W. *et al.* Sizing up *Septoria*. *Studies in Mycology* **75**, 307–390 (2013).

106. Singh, R. P. *et al.* Will stem rust destroy the world's wheat crop? *Advances in Agronomy* **98**, 271–309 (2008).
107. Milus, E. A., Kristensen, K. & Hovmøller, M. S. Evidence for increased aggressiveness in a recent widespread strain of *Puccinia striiformis* f. sp. *tritici* causing stripe rust of wheat. *Phytopathology* **99**, 89–94 (2009).
108. Ceresini, P. C. *et al.* Wheat blast: Past, present, and future. *Annual Review of Phytopathology* **in press**, (2018).
109. Urashima, A. S., Igarashi, S. & Kato, H. Host range, mating type, and fertility of *Pyricularia grisea* from wheat in Brazil. *Plant Disease* **77**, 1211–1216 (1993).
110. Castroagudín, V. L. *et al.* *Pyricularia graminis-tritici*, a new *Pyricularia* species causing wheat blast. *Persoonia - Molecular Phylogeny and Evolution of Fungi* **37**, 199–216 (2016).
111. Myers, L. D., Sherwood, J. L., Siegerist, W. C. & Hunger, R. M. Temperature-influenced virus movement in expression of resistance to soilborne wheat mosaic virus in hard red winter wheat (*Triticum aestivum*). *Phytopathology* **83**, 548–551 (1993).
112. Miller, N. R., Bergstrom, G. C. & Sorrells, M. E. Effect of wheat spindle streak mosaic virus on yield of winter-wheat in New York. *Phytopathology* **82**, 852–857 (1992).
113. Martin, T. J., Harvey, T. L. & Livers, R. . Resistance to wheat streak mosaic virus and its vector, *Aceria tulipae*. *Phytopathology* **66**, 346–349 (1976).
114. Lanoiselet, V. M., Cother, E. J. & Ash, G. J. Aggregate sheath spot and sheath spot of rice. *Crop Protection* **26**, 799–808 (2007).
115. Mew, T. W., Alvarez, A. M., Leach, J. E. & Swings, J. Focus on bacterial blight of rice. *Plant Disease* **77**, 5–12 (1993).
116. Ham, J. H., Melanson, R. A. & Rush, M. C. *Burkholderia glumae*: Next major pathogen of rice? *Molecular Plant Pathology* **12**, 329–339 (2011).

117. Cottyn, B. *et al.* Bacterial diseases of rice. I. Pathogenic bacteria associated with sheath rot complex and grain discoloration of rice in the Philippines. *Plant Disease* **80**, 438–445 (1996).
118. Morrill, W. L., Shepard, B. M., Rida, G. S. & Parducho, M. Damage by the Malayan black bug (Heteroptera: Pentatomidae) in rice. *Journal of Economic Entomology* **88**, 1466–1468 (1995).
119. Valent, B. & Chumley, F. G. Molecular genetic analysis of the rice blast fungus, *Magnaporthe grisea*. *Annual Review of Phytopathology* **29**, 443–467 (1991).
120. Barnwal, M. K. *et al.* A review on crop losses, epidemiology and disease management of rice brown spot to identify research priorities and knowledge gaps. *European Journal of Plant Pathology* **136**, 443–457 (2013).
121. Reddy, C. S. *et al.* Characterizing multiple linkages between individual diseases, crop health syndromes, germplasm deployment, and rice production situations in India. *Field Crops Research* **120**, 241–253 (2011).
122. Tanaka, E., Ashizawa, T., Sonoda, R. & Tanaka, C. *Villosiclava virens* gen. nov., comb. nov., teleomorph of *Ustilaginoidea virens*, the causal agent of rice false smut. *Mycotaxon* **106**, 491–501 (2008).
123. Hibino, H. *et al.* Rice grassy stunt virus: a planthopper-borne circular filament. *Phytopathology* **75**, 894–899 (1985).
124. Zeigler, R. S. & Morales, F. J. Genetic determination of replication of rice hoja blanca virus within its planthopper vector, *Sogatodes oryzicola*. *Phytopathology* **80**, 559–566 (1990).
125. Cabauatan, P. Q., Cabunagan, R. C. & Choi, I. R. in *Rice viruses transmitted by the brown planthopper Nilaparvata lugens Stål. in Planthoppers: New Threats to the Sustainability of Intensive Rice Production Systems in Asia*. (eds. Heong, K. L. & Hardy, B.) 357–368 (IRRI, 2009).
126. Bhanu, K. V, Reddy, P. S. & Zaheruddeen, S. M. Evaluation of some acaricides against leaf mite and sheath mite in rice. *Indian Journal of Plant Protection* **34**, 132–133 (2006).

127. Azzam, O. & Chancellor, T. C. B. The biology, epidemiology, and management of rice tungro disease in Asia. *Plant Disease* **86**, 88–100 (2002).
128. Lee, B. H., Choi, W. S., Lee, S. E. & Park, B. S. Fumigant toxicity of essential oils and their constituent compounds towards the rice weevil, *Sitophilus oryzae* (L.). *Crop Protection* **20**, 317–320 (2001).
129. Srinivasachary, Willocquet, L. & Savary, S. Resistance to rice sheath blight (*Rhizoctonia solani* Kühn) [(teleomorph: *Thanatephorus cucumeris* (A.B. Frank) Donk.)] disease: Current status and perspectives. *Euphytica* **178**, 1–22 (2011).
130. Satoh, K. *et al.* Selective modification of rice (*Oryza sativa*) gene expression by rice stripe virus infection. *Journal of General Virology* **91**, 294–305 (2010).
131. Litsinger, J. A., Libetario, E. M. & Barrion, A. T. Population dynamics of white grubs in the upland rice and maize environment of Northern Mindanao, Philippines. *International Journal of Pest Management* **48**, 239–260 (2002).
132. Ndjiondjop, M. N., Albar, L., Fargette, D., Fauquet, C. & Ghesquière, A. The genetic basis of high resistance to rice Yellow Mottle Virus (RYMV) in cultivars of two cultivated rice species. *Plant Disease* **83**, 931–935 (1999).
133. Drinkwater, T. W. & Groenewald, L. H. Comparison of imidacloprid and furathiocarb seed dressing insecticides for the control of the black maize beetle, *Heteronychus arator* Fabricius (Coleoptera: Scarabaeidae), in maize. *Crop Protection* **13**, 421–424 (1994).
134. Ogembo, J., Kunjeku, E. C. & Sithanatham, S. A preliminary study on the pathogenicity of two isolates of nucleopolyhedroviruses infecting African bollworm, *Helicoverpa armigera*. *International Journal of Tropical Insect Science* **25**, 218–222 (2007).
135. Calatayud, P. A., Le Ru, B. P., van den Berg, J. & Schulthess, F. Ecology of the African maize stalk borer, *Busseola fusca* (Lepidoptera: Noctuidae) with special reference to insect-plant interactions. *Insects* **5**, 539–563 (2014).

136. Bergstrom, G. C. & Nicholson, R. L. The biology of corn anthracnose: knowledge to exploit for improved management. *Plant Disease* **83**, 596–608 (1999).
137. Nafus, D. M. & Schreiner, I. H. Review of the biology and control of the Asian corn borer, *Ostrinia furnacalis* (lep: Pyralidae). *Tropical Pest Management* **37**, 41–56 (1991).
138. Ahuja, S. C. & Payak, M. M. Symptoms and signs of banded leaf and sheath blight of maize. *Phytoparasitica* **10**, 41–49 (1982).
139. Groth, J. V., Zeyen, R. J., Davis, D. W. & Christ, B. J. Yield and quality losses caused by common rust (*Puccinia sorghi* Schw.) in sweet corn (*Zea mays*) hybrids. *Crop Protection* **2**, 105–111 (1983).
140. Barros, T. S. L., Davis, R. E., Resende, R. O. & Dally, E. L. Design of a polymerase chain reaction for specific detection of corn stunt spiroplasma. *Plant Disease* **85**, 475–480 (2001).
141. Stinner, B. R., McCartney, D. A. & Van Doren, D. M. Soil and foliage arthropod communities in conventional, reduced and no-tillage corn (maize, *Zea mays* L.) systems: A comparison after 20 years of continuous cropping. *Soil and Tillage Research* **11**, 147–158 (1988).
142. Clark, T. L., Meinke, L. J. & Foster, J. E. Molecular phylogeny of *Diabrotica* beetles (Coleoptera: Chrysomelidae) inferred from analysis of combined mitochondrial and nuclear DNA sequences. *Insect Molecular Biology* **10**, 303–314 (2001).
143. Bourguet, D., Bethenod, M. T., Pasteur, N. & Viard, F. Gene flow in the European corn borer *Ostrinia nubilalis*: implications for the sustainability of transgenic insecticidal maize. *Proceedings of the Royal Society B: Biological Sciences* **267**, 117–122 (2000).
144. Reifschneider, F. J. & Arny, D. C. Yield loss of maize caused by *Kabatiella zae*. *Phytopathology* **73**, 607–609 (1983).
145. Wild, S. Invasive pest hits Africa. *Nature* **495**, 13–14 (2017).
146. Hoballah, M. E. *et al.* Occurrence and direct control potential of parasitoids and predators of the fall armyworm (Lepidoptera: Noctuidae) on maize in the subtropical lowlands of Mexico.



*Agricultural and Forest Entomology* **6**, 83–88 (2004).

147. Munkvold, G. P., McGee, D. C. & Carlton, W. M. Importance of different pathways for maize kernel infection by *Fusarium moniliforme*. *Phytopathology* **87**, 209–217 (1997).
148. Mahuku, G. *et al.* Maize Lethal Necrosis (MLN), an emerging threat to maize-based food security in Sub-Saharan Africa. *Phytopathology* **105**, 956–965 (2015).
149. Scheets, K. Maize chlorotic mottle machlomovirus and wheat streak mosaic rymovirus concentrations increase in the synergistic disease corn lethal necrosis. *Virology* **242**, 28–38 (1998).
150. Lenardon, S. L., March, G. J., Nome, S. F. & Ornaghi, J. a. Recent outbreak of “Mal de Rio Cuarto” virus on corn in Argentina. *Plant Disease* **82**, 448–448 (1998).
151. Eizaguirre, M., López, C. & Albajes, R. Dispersal capacity in the Mediterranean corn borer, *Sesamia nonagrioides*. *Entomologia Experimentalis et Applicata* **113**, 25–34 (2004).
152. Yen, T. T. O., Prasanna, B. M., Setty, T. A. S. & Rathore, R. S. Genetic variability for resistance to sorghum downy mildew (*Peronosclerospora sorghi*) and Rajasthan downy mildew (*P. heteropogoni*) in the tropical/sub-tropical Asian maize germplasm. *Euphytica* **138**, 23–31 (2004).
153. Scully, B. T., Nuessly, G. S., Hentz, M. G. & Beiriger, R. L. A rating scale to assess damage caused by the corn silk fly (*Euxesta stigmatias* Loew) (Diptera: Otitidae) on the ears of sweet corn. *Subtropical Plant Science* **54**, 34–38 (2002).
154. Ullstrup, A. J. The impacts of the southern corn leaf blight epidemics of 1970-1971. *Annual Review of Phytopathology* **10**, 37–50 (1972).
155. Kfir, R. Seasonal abundance of the stem borer *Chilo partellus* (Lepidoptera, Pyralidae) and its parasites on summer grain crops. *Journal of Economic Entomology* **85**, 518–529 (1992).
156. Ransom, J. K. Long-term approaches for the control of *Striga* in cereals: field management options. *Crop Protection* **19**, 759–763 (2000).

157. Capucho, A. S. *et al.* Influence of leaf position that correspond to whole plant severity and diagrammatic scale for white spot of corn. *Crop Protection* **29**, 1015–1020 (2010).
158. Foster, S. P., Denholm, I., Harling, Z. K., Moores, G. D. & Devonshire, A. L. Intensification of insecticide resistance in UK field populations of the peach-potato aphid, *Myzus persicae* (Hemiptera : Aphididae) in 1996. *Bulletin of Entomological Research* **88**, 127–130 (1998).
159. Varma, A. & Malathi, V. G. Emerging geminivirus problems: a serious threat to crop production. *Annals of Applied Biology* **142**, 145–164 (2003).
160. Usharani, K. S., Surendranath, B., Paul-Khurana, Garg, I. D. & Malathi, V. G. Potato leaf curl - A new disease of potato in northern India caused by a strain of Tomato leaf curl New Delhi virus. *Plant Pathology* **53**, 235 (2004).
161. Ailloud, F. *et al.* Comparative genomic analysis of *Ralstonia solanacearum* reveals candidate genes for host specificity. *BMC Genomics* **16**, 270 (2015).
162. Hare, J. D. Ecology and management of the Colorado potato beetle. *Annual Review of Entomology* **35**, 81–100 (1990).
163. Fyans, J. K., Bown, L. & Bignell, D. R. D. Isolation and characterization of plant-pathogenic *Streptomyces* species associated with common scab-infected potato tubers in Newfoundland. *Phytopathology* **106**, 123–131 (2016).
164. Rowe, R. C. & Powelson, M. L. Potato early dying: management challenges in a changing production environment. *Plant Disease* **86**, 1184–1193 (2002).
165. Webster, C. G. *et al.* First report of Groundnut ringspot virus infecting tomato in south Florida. *Plant Health Progress* (2010). doi:10.1094/PHP-2010-0707-01-BR.
166. Shepard, B. M., Samsudin & Braun, A. R. Seasonal incidence of *Liriomyza huidobrensis* (Diptera: Agromyzidae) and its parasitoids on vegetables in Indonesia. *International Journal of Pest Management* **44**, 43–47 (1998).
167. Ahmad, M., Ghaffar, A. & Rafiq, M. Host plants of leaf worm, *Spodoptera litura* (Fabricius)

- (Lepidoptera: Noctuidae) in Pakistan. *Asian Journal of Agriculture and Biology* **1**, 23–28 (2013).
168. Keiser, A., Häberli, M. & Stamp, P. Quality deficiencies on potato (*Solanum tuberosum* L.) tubers caused by *Rhizoctonia solani*, wireworms (*Agriotes* ssp.) and slugs (*Deroceras reticulatum*, *Arion hortensis*) in different farming systems. *Field Crops Research* **128**, 147–155 (2012).
169. Hansen, A. K., Trumble, J. T., Stouthamer, R. & Paine, T. D. A new huanglongbing species, “*Candidatus Liberibacter psyllauros*,” found to infect tomato and potato, is vectored by the psyllid *Bactericera cockerelli* (Sulc). *Applied and Environmental Mycology* **74**, 5862–5865 (2008).
170. Lim, S. M. Brown spot severity and yield reduction in soybean. *Phytopathology* **70**, 974–977 (1980).
171. Walters, H. J. Soybean leaf blight caused by *Cercospora kikuchii*. *Plant Disease* **64**, 961–962 (1980).
172. Bowen, C. R. & Schapaugh Jr., W. T. Relationships among charcoal rot infection, yield, and stability estimates in soybean blends. *Crop Sci* **29**, 42–46 (1989).
173. Lombard, L., Crous, P. W., Wingfield, B. D. & Wingfield, M. J. Species concepts in *Calonectria* (*Cylindrocladium*). *Studies in Mycology* **66**, 1–13 (2010).
174. Zhang, A. W., Riccioni, L., Pedersen, W. L., Kollipara, K. P. & Hartman, G. L. Molecular identification and phylogenetic grouping of *Diaporthe phaseolorum* and *Phomopsis longicolla* isolates from soybean. *Phytopathology* **88**, 1306–1314 (1998).
175. Kövics, G. J., Sándor, E., Rai, M. K. & Irinyi, L. Phoma-like fungi on soybeans. *Critical Reviews in Microbiology* **40**, 49–62 (2014).
176. Tyler, B. M. *Phytophthora sojae*: root rot pathogen of soybean and model oomycete. *Molecular Plant Pathology* **8**, 1–8 (2007).

177. Broders, K. D., Lipps, P. E., Paul, P. A. & Dorrance, A. E. Characterization of *Pythium* spp. association with corn and soybean seedling disease in Ohio. *Plant Disease* **91**, 727–735 (2007).
178. Liu, J. Z., Fang, Y. & Pang, H. The current status of the Soybean-Soybean Mosaic Virus (SMV) pathosystem. *Frontiers in Microbiology* **7**, 1906 (2016).
179. Yorinori, J. T. *et al.* Epidemics of Soybean Rust (*Phakopsora pachyrhizi*) in Brazil and Paraguay from 2001 to 2003. *Plant Disease* **89**, 675–677 (2005).
180. Hildebrand, D. F., Rodriguez, J. G., Brown, G. C., Luu, K. T. & Volden, C. S. Peroxidative responses of leaves in two soybean genotypes injured by twospotted spider-mites (Acari, Tetranychidae). *Journal of Economic Entomology* **79**, 1459–1465 (1986).
181. Rothrock, C. S., Hobbs, T. W. & Philips, D. V. Effects of tillage and cropping system on incidence and severity of southern stem canker of soybean. *Phytopathology* **75**, 1156–1159 (1985).
182. Lu, X., Robertson, A. E., Byamukama, E. Z. & Nutter, F. W., J. Evaluating the importance of stem canker of soybean in Iowa. *Plant Disease* **94**, 167–173 (2010).
183. Navi, S. S. & Yang, X. B. Sudden death syndrome – A growing threat of losses in soybeans. *CAB Reviews* 039 (2016).
184. Koenning, S. R., Creswell, T. C., Dunphy, E. J., Sikora, E. J. & Mueller, J. D. Increased occurrence of target spot of soybean caused by *Corynespora cassiicola* in the Southeastern United States. *Plant Disease* **90**, 974 (2006).
